# Supplementary material
Source: publisher site journal article supplement (https://www.dovepress.com/get_supplementary_file.php?f=484582.docx)
Supplement: Supplementary file 1 [file get_supplementary_file.php]

**Supplementary Table 1.** SNPs and F value for exposure

| Sleep duration | samplesize.exposure | se.exposure | beta.exposure | pos.exposure | chr.exposure | pval.exposure | id.exposure | SNP | effect_allele.exposure | other_allele.exposure | eaf.exposure | exposure | mr_keep.exposure | pval_origin.exposure | data_source.exposure | R2 | F |
| --- | --- | --- | --- | --- | --- | --- | --- | --- | --- | --- | --- | --- | --- | --- | --- | --- | --- |
| 460099 | 0.00176031 | -0.0127275 | 34731984 | 1 | 4.80E-13 | ukb-b-4424 | rs915416 | G | C | 0.70906 | Sleep duration || id:ukb-b-4424 | TRUE | reported | igd | 0.000113608 | 52.2764408 |
| 460099 | 0.00162062 | -0.0108333 | 66470206 | 1 | 2.30E-11 | ukb-b-4424 | rs2186122 | T | A | 0.559911 | Sleep duration || id:ukb-b-4424 | TRUE | reported | igd | 9.71E-05 | 44.68453714 |
| 460099 | 0.00168475 | 0.00929853 | 201861016 | 1 | 3.40E-08 | ukb-b-4424 | rs2279681 | G | C | 0.341785 | Sleep duration || id:ukb-b-4424 | TRUE | reported | igd | 6.62E-05 | 30.46181493 |
| 460099 | 0.00163399 | -0.0099657 | 31555056 | 1 | 1.10E-09 | ukb-b-4424 | rs7517981 | C | T | 0.601498 | Sleep duration || id:ukb-b-4424 | TRUE | reported | igd | 8.08E-05 | 37.1976019 |
| 460099 | 0.00179427 | 0.0123378 | 98527951 | 1 | 6.10E-12 | ukb-b-4424 | rs12567114 | A | G | 0.276368 | Sleep duration || id:ukb-b-4424 | TRUE | reported | igd | 0.000102755 | 47.28223229 |
| 460099 | 0.00166133 | 0.0092696 | 8705037 | 1 | 2.40E-08 | ukb-b-4424 | rs1463053 | A | G | 0.639694 | Sleep duration || id:ukb-b-4424 | TRUE | reported | igd | 6.77E-05 | 31.13209055 |
| 460099 | 0.00200498 | 0.0115272 | 71703970 | 1 | 9.00E-09 | ukb-b-4424 | rs6681755 | A | G | 0.199783 | Sleep duration || id:ukb-b-4424 | TRUE | reported | igd | 7.18E-05 | 33.05412607 |
| 460099 | 0.00219716 | -0.0130999 | 40382712 | 2 | 2.50E-09 | ukb-b-4424 | rs374153 | T | C | 0.842567 | Sleep duration || id:ukb-b-4424 | TRUE | reported | igd | 7.73E-05 | 35.54763442 |
| 460099 | 0.00192922 | 0.0289035 | 114089551 | 2 | 9.60E-51 | ukb-b-4424 | rs2863957 | A | C | 0.220537 | Sleep duration || id:ukb-b-4424 | TRUE | reported | igd | 0.000487612 | 224.4581983 |
| 460099 | 0.00184758 | 0.011796 | 166945635 | 2 | 1.70E-10 | ukb-b-4424 | rs1972712 | C | T | 0.249455 | Sleep duration || id:ukb-b-4424 | TRUE | reported | igd | 8.86E-05 | 40.76253035 |
| 460099 | 0.00184372 | -0.0101806 | 103944744 | 2 | 3.40E-08 | ukb-b-4424 | rs72831782 | A | T | 0.269409 | Sleep duration || id:ukb-b-4424 | TRUE | reported | igd | 6.63E-05 | 30.48982467 |
| 460099 | 0.0016555 | 0.0149506 | 58058069 | 2 | 1.70E-19 | ukb-b-4424 | rs2683630 | G | C | 0.629076 | Sleep duration || id:ukb-b-4424 | TRUE | reported | igd | 0.000177227 | 81.55620078 |
| 460099 | 0.00287424 | 0.0236649 | 58871658 | 2 | 1.80E-16 | ukb-b-4424 | rs75539574 | C | A | 0.085774 | Sleep duration || id:ukb-b-4424 | TRUE | reported | igd | 0.000147315 | 67.78933933 |
| 460099 | 0.00169075 | 0.0101569 | 147583187 | 2 | 1.90E-09 | ukb-b-4424 | rs35662245 | A | T | 0.338713 | Sleep duration || id:ukb-b-4424 | TRUE | reported | igd | 7.84E-05 | 36.0879052 |
| 460099 | 0.00163116 | -0.00983781 | 178539272 | 3 | 1.60E-09 | ukb-b-4424 | rs6783516 | T | G | 0.583817 | Sleep duration || id:ukb-b-4424 | TRUE | reported | igd | 7.91E-05 | 36.37490331 |
| 460099 | 0.00368137 | -0.0216874 | 55823890 | 3 | 3.80E-09 | ukb-b-4424 | rs76258078 | G | A | 0.049994 | Sleep duration || id:ukb-b-4424 | TRUE | reported | igd | 7.54E-05 | 34.70516821 |
| 460099 | 0.00169722 | 0.0114805 | 135874294 | 3 | 1.30E-11 | ukb-b-4424 | rs113021516 | C | G | 0.335898 | Sleep duration || id:ukb-b-4424 | TRUE | reported | igd | 9.94E-05 | 45.75551378 |
| 460099 | 0.00161761 | -0.00883899 | 70470834 | 3 | 4.60E-08 | ukb-b-4424 | rs17732997 | G | C | 0.429679 | Sleep duration || id:ukb-b-4424 | TRUE | reported | igd | 6.49E-05 | 29.85765883 |
| 460099 | 0.00189404 | -0.0111549 | 74961196 | 3 | 3.90E-09 | ukb-b-4424 | rs9810474 | T | C | 0.232184 | Sleep duration || id:ukb-b-4424 | TRUE | reported | igd | 7.54E-05 | 34.68575736 |
| 460099 | 0.00162466 | -0.0101517 | 107564459 | 3 | 4.10E-10 | ukb-b-4424 | rs7644809 | C | T | 0.576033 | Sleep duration || id:ukb-b-4424 | TRUE | reported | igd | 8.49E-05 | 39.04367476 |
| 460099 | 0.00303933 | -0.0242704 | 103188709 | 4 | 1.40E-15 | ukb-b-4424 | rs13107325 | T | C | 0.074905 | Sleep duration || id:ukb-b-4424 | TRUE | reported | igd | 0.000138576 | 63.76704125 |
| 460099 | 0.00160143 | -0.00980706 | 18327896 | 4 | 9.10E-10 | ukb-b-4424 | rs2192528 | G | A | 0.522493 | Sleep duration || id:ukb-b-4424 | TRUE | reported | igd | 8.15E-05 | 37.50246866 |
| 460099 | 0.00181248 | -0.0106369 | 82287250 | 4 | 4.40E-09 | ukb-b-4424 | rs2839753 | C | T | 0.265347 | Sleep duration || id:ukb-b-4424 | TRUE | reported | igd | 7.49E-05 | 34.44148107 |
| 460099 | 0.00173522 | -0.00986657 | 135486536 | 5 | 1.30E-08 | ukb-b-4424 | rs7711696 | T | G | 0.304987 | Sleep duration || id:ukb-b-4424 | TRUE | reported | igd | 7.03E-05 | 32.33117033 |
| 460099 | 0.00170288 | -0.0106435 | 7249696 | 5 | 4.10E-10 | ukb-b-4424 | rs12518468 | C | T | 0.328685 | Sleep duration || id:ukb-b-4424 | TRUE | reported | igd | 8.49E-05 | 39.06600052 |
| 460099 | 0.00161004 | -0.00928337 | 1428883 | 5 | 8.10E-09 | ukb-b-4424 | rs365663 | G | A | 0.45495 | Sleep duration || id:ukb-b-4424 | TRUE | reported | igd | 7.23E-05 | 33.2457474 |
| 460099 | 0.00169707 | 0.0117662 | 102313939 | 5 | 4.10E-12 | ukb-b-4424 | rs6889592 | A | G | 0.332608 | Sleep duration || id:ukb-b-4424 | TRUE | reported | igd | 0.000104466 | 48.06966018 |
| 460099 | 0.00198822 | 0.0113794 | 176751059 | 5 | 1.00E-08 | ukb-b-4424 | rs151014368 | A | G | 0.20734 | Sleep duration || id:ukb-b-4424 | TRUE | reported | igd | 7.12E-05 | 32.75728982 |
| 460099 | 0.00164901 | -0.00948383 | 54937974 | 6 | 8.90E-09 | ukb-b-4424 | rs9382445 | C | T | 0.375168 | Sleep duration || id:ukb-b-4424 | TRUE | reported | igd | 7.19E-05 | 33.0764624 |
| 460099 | 0.00202652 | -0.0132113 | 29829636 | 6 | 7.10E-11 | ukb-b-4424 | rs1611719 | A | G | 0.209698 | Sleep duration || id:ukb-b-4424 | TRUE | reported | igd | 9.24E-05 | 42.49985349 |
| 460099 | 0.00193332 | -0.0111278 | 43160375 | 6 | 8.60E-09 | ukb-b-4424 | rs113113059 | C | T | 0.219834 | Sleep duration || id:ukb-b-4424 | TRUE | reported | igd | 7.20E-05 | 33.12907024 |
| 460099 | 0.00173455 | -0.00951481 | 130638156 | 6 | 4.10E-08 | ukb-b-4424 | rs7740402 | G | T | 0.3061 | Sleep duration || id:ukb-b-4424 | TRUE | reported | igd | 6.54E-05 | 30.0901745 |
| 460099 | 0.00162351 | 0.0091922 | 93162639 | 6 | 1.50E-08 | ukb-b-4424 | rs9345234 | C | A | 0.57786 | Sleep duration || id:ukb-b-4424 | TRUE | reported | igd | 6.97E-05 | 32.05731215 |
| 460099 | 0.00178155 | -0.0133534 | 28584775 | 6 | 6.60E-14 | ukb-b-4424 | rs34556183 | G | A | 0.279888 | Sleep duration || id:ukb-b-4424 | TRUE | reported | igd | 0.000122091 | 56.18052561 |
| 460099 | 0.00186248 | -0.0117257 | 132568255 | 7 | 3.10E-10 | ukb-b-4424 | rs11982852 | T | C | 0.243858 | Sleep duration || id:ukb-b-4424 | TRUE | reported | igd | 8.61E-05 | 39.63623857 |
| 460099 | 0.00192625 | 0.0129633 | 2107262 | 7 | 1.70E-11 | ukb-b-4424 | rs62444917 | C | A | 0.222315 | Sleep duration || id:ukb-b-4424 | TRUE | reported | igd | 9.84E-05 | 45.29017013 |
| 460099 | 0.00181083 | -0.0134358 | 114126432 | 7 | 1.20E-13 | ukb-b-4424 | rs2079070 | G | C | 0.734582 | Sleep duration || id:ukb-b-4424 | TRUE | reported | igd | 0.000119638 | 55.05158299 |
| 460099 | 0.00160135 | -0.0105656 | 10280228 | 8 | 4.20E-11 | ukb-b-4424 | rs7831557 | A | G | 0.517438 | Sleep duration || id:ukb-b-4424 | TRUE | reported | igd | 9.46E-05 | 43.53253056 |
| 460099 | 0.00168824 | 0.0100011 | 14043662 | 8 | 3.10E-09 | ukb-b-4424 | rs7016314 | C | T | 0.655927 | Sleep duration || id:ukb-b-4424 | TRUE | reported | igd | 7.63E-05 | 35.09338653 |
| 460099 | 0.00372396 | 0.0218515 | 36901494 | 9 | 4.40E-09 | ukb-b-4424 | rs17391944 | G | T | 0.04986 | Sleep duration || id:ukb-b-4424 | TRUE | reported | igd | 7.48E-05 | 34.4310769 |
| 460099 | 0.00454852 | -0.0252948 | 70541193 | 10 | 2.70E-08 | ukb-b-4424 | rs112100783 | A | G | 0.033439 | Sleep duration || id:ukb-b-4424 | TRUE | reported | igd | 6.72E-05 | 30.92576096 |
| 460099 | 0.00197431 | 0.0114031 | 125060948 | 10 | 7.70E-09 | ukb-b-4424 | rs10510128 | A | G | 0.207951 | Sleep duration || id:ukb-b-4424 | TRUE | reported | igd | 7.25E-05 | 33.35902029 |
| 460099 | 0.00163637 | -0.00907587 | 64564892 | 10 | 2.90E-08 | ukb-b-4424 | rs2236295 | T | G | 0.403043 | Sleep duration || id:ukb-b-4424 | TRUE | reported | igd | 6.69E-05 | 30.76179173 |
| 460099 | 0.00162182 | 0.0116589 | 28829882 | 11 | 6.50E-13 | ukb-b-4424 | rs1517572 | C | A | 0.581256 | Sleep duration || id:ukb-b-4424 | TRUE | reported | igd | 0.000112308 | 51.6782696 |
| 460099 | 0.00160279 | 0.010819 | 43769287 | 11 | 1.50E-11 | ukb-b-4424 | rs7115856 | C | A | 0.461273 | Sleep duration || id:ukb-b-4424 | TRUE | reported | igd | 9.90E-05 | 45.56371277 |
| 460099 | 0.00160373 | -0.0102766 | 47406592 | 11 | 1.50E-10 | ukb-b-4424 | rs11039216 | T | C | 0.532944 | Sleep duration || id:ukb-b-4424 | TRUE | reported | igd | 8.92E-05 | 41.06147167 |
| 460099 | 0.00163853 | -0.00979722 | 113293596 | 11 | 2.20E-09 | ukb-b-4424 | rs2734831 | G | T | 0.606881 | Sleep duration || id:ukb-b-4424 | TRUE | reported | igd | 7.77E-05 | 35.75156342 |
| 460099 | 0.001678 | 0.00974534 | 61588305 | 11 | 6.30E-09 | ukb-b-4424 | rs174564 | G | A | 0.348602 | Sleep duration || id:ukb-b-4424 | TRUE | reported | igd | 7.33E-05 | 33.72936696 |
| 460099 | 0.0025174 | -0.0158002 | 101520886 | 11 | 3.50E-10 | ukb-b-4424 | rs1939455 | T | G | 0.120291 | Sleep duration || id:ukb-b-4424 | TRUE | reported | igd | 8.56E-05 | 39.39297905 |
| 460099 | 0.0018253 | 0.0105257 | 88297740 | 11 | 8.10E-09 | ukb-b-4424 | rs1553132 | G | A | 0.258638 | Sleep duration || id:ukb-b-4424 | TRUE | reported | igd | 7.23E-05 | 33.25305725 |
| 460099 | 0.00176809 | -0.0100207 | 38764559 | 12 | 1.40E-08 | ukb-b-4424 | rs34354917 | A | C | 0.288625 | Sleep duration || id:ukb-b-4424 | TRUE | reported | igd | 6.98E-05 | 32.12073669 |
| 460099 | 0.00163264 | 0.0108732 | 117951150 | 12 | 2.70E-11 | ukb-b-4424 | rs4767550 | G | A | 0.413171 | Sleep duration || id:ukb-b-4424 | TRUE | reported | igd | 9.64E-05 | 44.35391909 |
| 460099 | 0.001661 | 0.00978234 | 53888526 | 13 | 3.90E-09 | ukb-b-4424 | rs6561715 | A | T | 0.630636 | Sleep duration || id:ukb-b-4424 | TRUE | reported | igd | 7.54E-05 | 34.68521205 |
| 460099 | 0.00167463 | -0.00969462 | 65554638 | 14 | 7.10E-09 | ukb-b-4424 | rs55658675 | T | C | 0.352906 | Sleep duration || id:ukb-b-4424 | TRUE | reported | igd | 7.28E-05 | 33.51366772 |
| 460099 | 0.00294327 | -0.019985 | 78495761 | 14 | 1.10E-11 | ukb-b-4424 | rs11621908 | T | C | 0.082807 | Sleep duration || id:ukb-b-4424 | TRUE | reported | igd | 0.000100197 | 46.10480715 |
| 460099 | 0.00164549 | -0.00925348 | 99735233 | 14 | 1.90E-08 | ukb-b-4424 | rs2748809 | C | T | 0.429258 | Sleep duration || id:ukb-b-4424 | TRUE | reported | igd | 6.87E-05 | 31.62407263 |
| 460099 | 0.00179311 | -0.0133838 | 47989799 | 15 | 8.40E-14 | ukb-b-4424 | rs8038326 | G | A | 0.273169 | Sleep duration || id:ukb-b-4424 | TRUE | reported | igd | 0.000121071 | 55.71127828 |
| 460099 | 0.00163585 | 0.0116218 | 6540795 | 16 | 1.20E-12 | ukb-b-4424 | rs56367859 | G | A | 0.397585 | Sleep duration || id:ukb-b-4424 | TRUE | reported | igd | 0.000109688 | 50.47286417 |
| 460099 | 0.00161069 | 0.0120438 | 56269892 | 16 | 7.60E-14 | ukb-b-4424 | rs9302680 | A | G | 0.439272 | Sleep duration || id:ukb-b-4424 | TRUE | reported | igd | 0.000121506 | 55.91151464 |
| 460099 | 0.00176035 | 0.0109493 | 23909538 | 16 | 5.00E-10 | ukb-b-4424 | rs11643715 | G | C | 0.292625 | Sleep duration || id:ukb-b-4424 | TRUE | reported | igd | 8.41E-05 | 38.68768769 |
| 460099 | 0.00161283 | -0.0110198 | 53798622 | 16 | 8.30E-12 | ukb-b-4424 | rs8047587 | T | G | 0.439514 | Sleep duration || id:ukb-b-4424 | TRUE | reported | igd | 0.000101455 | 46.68403124 |
| 460099 | 0.00193583 | 0.0109737 | 20023601 | 16 | 1.40E-08 | ukb-b-4424 | rs72771082 | G | A | 0.217832 | Sleep duration || id:ukb-b-4424 | TRUE | reported | igd | 6.98E-05 | 32.13437421 |
| 460099 | 0.00163392 | -0.00932835 | 79954544 | 17 | 1.10E-08 | ukb-b-4424 | rs8074498 | A | T | 0.580951 | Sleep duration || id:ukb-b-4424 | TRUE | reported | igd | 7.08E-05 | 32.59464081 |
| 460099 | 0.00168963 | 0.0111701 | 11231513 | 17 | 3.80E-11 | ukb-b-4424 | rs11650677 | A | G | 0.339185 | Sleep duration || id:ukb-b-4424 | TRUE | reported | igd | 9.50E-05 | 43.70478725 |
| 460099 | 0.00160094 | -0.00944768 | 45575354 | 17 | 3.60E-09 | ukb-b-4424 | rs9903898 | T | C | 0.488883 | Sleep duration || id:ukb-b-4424 | TRUE | reported | igd | 7.57E-05 | 34.8255794 |
| 460099 | 0.00199248 | 0.0109222 | 21335627 | 17 | 4.20E-08 | ukb-b-4424 | rs8072993 | G | T | 0.635677 | Sleep duration || id:ukb-b-4424 | TRUE | reported | igd | 6.53E-05 | 30.04902744 |
| 460099 | 0.00182049 | -0.012642 | 53050058 | 18 | 3.80E-12 | ukb-b-4424 | rs1348047 | T | G | 0.267253 | Sleep duration || id:ukb-b-4424 | TRUE | reported | igd | 0.000104799 | 48.22287386 |
| 460099 | 0.00164378 | -0.00919552 | 34986767 | 19 | 2.20E-08 | ukb-b-4424 | rs35126035 | C | A | 0.55833 | Sleep duration || id:ukb-b-4424 | TRUE | reported | igd | 6.80E-05 | 31.29416115 |
| 460099 | 0.00162787 | 0.0109576 | 9942123 | 19 | 1.70E-11 | ukb-b-4424 | rs34786000 | T | G | 0.553361 | Sleep duration || id:ukb-b-4424 | TRUE | reported | igd | 9.85E-05 | 45.30953012 |
| 460099 | 0.00161401 | -0.00926905 | 43538733 | 20 | 9.30E-09 | ukb-b-4424 | rs2072727 | C | T | 0.56459 | Sleep duration || id:ukb-b-4424 | TRUE | reported | igd | 7.17E-05 | 32.98041526 |
| 460099 | 0.00229721 | -0.0135938 | 39077058 | 22 | 3.30E-09 | ukb-b-4424 | rs9611007 | T | C | 0.141673 | Sleep duration || id:ukb-b-4424 | TRUE | reported | igd | 7.61E-05 | 35.01696225 |
| **Insomnia** | 462341 | 0.00149047 | -0.00862206 | 1848109 | 1 | 7.30E-09 | ukb-b-3957 | rs2803296 | C | G | 0.543586 | Sleeplessness / insomnia || id:ukb-b-3957 | TRUE | reported | igd | 7.24E-05 | 33.46368201 |
| 462341 | 0.00163048 | 0.0111868 | 107190407 | 1 | 6.80E-12 | ukb-b-3957 | rs12049261 | C | G | 0.292534 | Sleeplessness / insomnia || id:ukb-b-3957 | TRUE | reported | igd | 0.000101806 | 47.07376304 |
| 462341 | 0.00151022 | -0.0102669 | 57842729 | 1 | 1.10E-11 | ukb-b-3957 | rs6690017 | G | T | 0.408855 | Sleeplessness / insomnia || id:ukb-b-3957 | TRUE | reported | igd | 1.00E-04 | 46.21642524 |
| 462341 | 0.00149103 | 0.0106284 | 201793440 | 1 | 1.00E-12 | ukb-b-3957 | rs2644128 | G | C | 0.548279 | Sleeplessness / insomnia || id:ukb-b-3957 | TRUE | reported | igd | 0.000109889 | 50.81139746 |
| 462341 | 0.00156161 | -0.00960596 | 147423012 | 2 | 7.70E-10 | ukb-b-3957 | rs4572538 | T | C | 0.364055 | Sleeplessness / insomnia || id:ukb-b-3957 | TRUE | reported | igd | 8.18E-05 | 37.8385518 |
| 462341 | 0.00205225 | -0.0147948 | 58930167 | 2 | 5.60E-13 | ukb-b-3957 | rs56365214 | A | C | 0.155781 | Sleeplessness / insomnia || id:ukb-b-3957 | TRUE | reported | igd | 0.000112395 | 51.97036774 |
| 462341 | 0.00149214 | -0.00854833 | 191288833 | 2 | 1.00E-08 | ukb-b-3957 | rs4577309 | G | A | 0.533655 | Sleeplessness / insomnia || id:ukb-b-3957 | TRUE | reported | igd | 7.10E-05 | 32.82022353 |
| 462341 | 0.00184485 | -0.0102429 | 200955823 | 2 | 2.80E-08 | ukb-b-3957 | rs12470989 | G | A | 0.203934 | Sleeplessness / insomnia || id:ukb-b-3957 | TRUE | reported | igd | 6.67E-05 | 30.82633301 |
| 462341 | 0.00331329 | 0.0467802 | 66750564 | 2 | 2.90E-45 | ukb-b-3957 | rs113851554 | T | G | 0.057291 | Sleeplessness / insomnia || id:ukb-b-3957 | TRUE | reported | igd | 0.000430979 | 199.3440926 |
| 462341 | 0.00181352 | -0.0124111 | 114103966 | 2 | 7.70E-12 | ukb-b-3957 | rs56093896 | A | C | 0.214053 | Sleeplessness / insomnia || id:ukb-b-3957 | TRUE | reported | igd | 0.000101291 | 46.83537179 |
| 462341 | 0.0016233 | -0.0116018 | 50172397 | 3 | 8.90E-13 | ukb-b-3957 | rs2014830 | T | C | 0.303519 | Sleeplessness / insomnia || id:ukb-b-3957 | TRUE | reported | igd | 0.00011047 | 51.08004757 |
| 462341 | 0.00235299 | 0.013423 | 117702270 | 3 | 1.20E-08 | ukb-b-3957 | rs705219 | A | T | 0.887373 | Sleeplessness / insomnia || id:ukb-b-3957 | TRUE | reported | igd | 7.04E-05 | 32.54296647 |
| 462341 | 0.00377648 | -0.0218562 | 116425935 | 3 | 7.10E-09 | ukb-b-3957 | rs9845387 | A | C | 0.040279 | Sleeplessness / insomnia || id:ukb-b-3957 | TRUE | reported | igd | 7.24E-05 | 33.49446579 |
| 462341 | 0.00149645 | 0.00838726 | 91292200 | 4 | 2.10E-08 | ukb-b-3957 | rs1988337 | G | A | 0.552395 | Sleeplessness / insomnia || id:ukb-b-3957 | TRUE | reported | igd | 6.79E-05 | 31.41332535 |
| 462341 | 0.00164946 | 0.0100437 | 105330133 | 4 | 1.10E-09 | ukb-b-3957 | rs11097861 | G | A | 0.716256 | Sleeplessness / insomnia || id:ukb-b-3957 | TRUE | reported | igd | 8.02E-05 | 37.07677992 |
| 462341 | 0.00155238 | -0.00848084 | 15091201 | 4 | 4.70E-08 | ukb-b-3957 | rs2604551 | G | T | 0.640384 | Sleeplessness / insomnia || id:ukb-b-3957 | TRUE | reported | igd | 6.45E-05 | 29.84556352 |
| 462341 | 0.00154996 | 0.0102216 | 103889998 | 5 | 4.30E-11 | ukb-b-3957 | rs1592757 | C | G | 0.355788 | Sleeplessness / insomnia || id:ukb-b-3957 | TRUE | reported | igd | 9.41E-05 | 43.49055041 |
| 462341 | 0.00161138 | 0.0111716 | 135486536 | 5 | 4.10E-12 | ukb-b-3957 | rs7711696 | T | G | 0.305042 | Sleeplessness / insomnia || id:ukb-b-3957 | TRUE | reported | igd | 0.000103951 | 48.06544174 |
| 462341 | 0.00149107 | 0.00947493 | 87678585 | 5 | 2.10E-10 | ukb-b-3957 | rs1430205 | T | C | 0.461507 | Sleeplessness / insomnia || id:ukb-b-3957 | TRUE | reported | igd | 8.73E-05 | 40.37886216 |
| 462341 | 0.00149134 | 0.00971363 | 105400837 | 6 | 7.30E-11 | ukb-b-3957 | rs314280 | G | A | 0.547047 | Sleeplessness / insomnia || id:ukb-b-3957 | TRUE | reported | igd | 9.18E-05 | 42.42363739 |
| 462341 | 0.00150428 | -0.00902066 | 1070468 | 7 | 2.00E-09 | ukb-b-3957 | rs6975972 | G | A | 0.578726 | Sleeplessness / insomnia || id:ukb-b-3957 | TRUE | reported | igd | 7.78E-05 | 35.95980984 |
| 462341 | 0.00150974 | -0.0100553 | 114047542 | 7 | 2.70E-11 | ukb-b-3957 | rs8180817 | C | G | 0.431016 | Sleeplessness / insomnia || id:ukb-b-3957 | TRUE | reported | igd | 9.59E-05 | 44.35921607 |
| 462341 | 0.00207434 | 0.0129893 | 10236559 | 8 | 3.80E-10 | ukb-b-3957 | rs17151854 | T | G | 0.15241 | Sleeplessness / insomnia || id:ukb-b-3957 | TRUE | reported | igd | 8.48E-05 | 39.21116375 |
| 462341 | 0.00157854 | -0.0103391 | 96202932 | 9 | 5.80E-11 | ukb-b-3957 | rs11790060 | C | T | 0.330834 | Sleeplessness / insomnia || id:ukb-b-3957 | TRUE | reported | igd | 9.28E-05 | 42.89951777 |
| 462341 | 0.00149108 | 0.00839066 | 64521829 | 10 | 1.80E-08 | ukb-b-3957 | rs224032 | A | G | 0.550358 | Sleeplessness / insomnia || id:ukb-b-3957 | TRUE | reported | igd | 6.85E-05 | 31.66565515 |
| 462341 | 0.00162078 | -0.0099161 | 104250278 | 10 | 9.50E-10 | ukb-b-3957 | rs17709610 | G | A | 0.297979 | Sleeplessness / insomnia || id:ukb-b-3957 | TRUE | reported | igd | 8.10E-05 | 37.4310301 |
| 462341 | 0.00274996 | -0.0178001 | 104680137 | 10 | 9.60E-11 | ukb-b-3957 | rs2297787 | A | T | 0.080193 | Sleeplessness / insomnia || id:ukb-b-3957 | TRUE | reported | igd | 9.06E-05 | 41.89770669 |
| 462341 | 0.00288103 | 0.016478 | 65585990 | 11 | 1.10E-08 | ukb-b-3957 | rs72924721 | T | C | 0.073137 | Sleeplessness / insomnia || id:ukb-b-3957 | TRUE | reported | igd | 7.07E-05 | 32.71233591 |
| 462341 | 0.00150271 | -0.00947656 | 47441513 | 11 | 2.90E-10 | ukb-b-3957 | rs10838708 | A | G | 0.45899 | Sleeplessness / insomnia || id:ukb-b-3957 | TRUE | reported | igd | 8.60E-05 | 39.76941491 |
| 462341 | 0.0017167 | 0.0103356 | 109855201 | 12 | 1.70E-09 | ukb-b-3957 | rs68094047 | T | C | 0.251267 | Sleeplessness / insomnia || id:ukb-b-3957 | TRUE | reported | igd | 7.84E-05 | 36.24771993 |
| 462341 | 0.00175313 | 0.0106361 | 84721107 | 12 | 1.30E-09 | ukb-b-3957 | rs931221 | A | T | 0.236738 | Sleeplessness / insomnia || id:ukb-b-3957 | TRUE | reported | igd | 7.96E-05 | 36.8073628 |
| 462341 | 0.00163145 | -0.00988248 | 57487814 | 12 | 1.40E-09 | ukb-b-3957 | rs324017 | C | A | 0.705433 | Sleeplessness / insomnia || id:ukb-b-3957 | TRUE | reported | igd | 7.94E-05 | 36.69293681 |
| 462341 | 0.00157858 | -0.0106379 | 59832775 | 13 | 1.60E-11 | ukb-b-3957 | rs9570080 | C | T | 0.344131 | Sleeplessness / insomnia || id:ukb-b-3957 | TRUE | reported | igd | 9.82E-05 | 45.41263856 |
| 462341 | 0.00154234 | -0.011623 | 53888526 | 13 | 4.80E-14 | ukb-b-3957 | rs6561715 | A | T | 0.630662 | Sleeplessness / insomnia || id:ukb-b-3957 | TRUE | reported | igd | 0.000122818 | 56.79032485 |
| 462341 | 0.00156447 | 0.00910814 | 112642528 | 13 | 5.80E-09 | ukb-b-3957 | rs1547630 | A | G | 0.651513 | Sleeplessness / insomnia || id:ukb-b-3957 | TRUE | reported | igd | 7.33E-05 | 33.89401654 |
| 462341 | 0.00175566 | -0.011796 | 74340336 | 15 | 1.80E-11 | ukb-b-3957 | rs4886860 | C | G | 0.767408 | Sleeplessness / insomnia || id:ukb-b-3957 | TRUE | reported | igd | 9.76E-05 | 45.14262612 |
| 462341 | 0.00148509 | 0.00937342 | 67804682 | 15 | 2.80E-10 | ukb-b-3957 | rs11635495 | C | T | 0.512179 | Sleeplessness / insomnia || id:ukb-b-3957 | TRUE | reported | igd | 8.62E-05 | 39.83719286 |
| 462341 | 0.00150275 | -0.00961678 | 59476179 | 16 | 1.60E-10 | ukb-b-3957 | rs2062113 | C | T | 0.568257 | Sleeplessness / insomnia || id:ukb-b-3957 | TRUE | reported | igd | 8.86E-05 | 40.95283861 |
| 462341 | 0.00159687 | 0.0132051 | 43223292 | 17 | 1.30E-16 | ukb-b-3957 | rs9894577 | A | G | 0.3182 | Sleeplessness / insomnia || id:ukb-b-3957 | TRUE | reported | igd | 0.000147883 | 68.3820925 |
| 462341 | 0.00163869 | -0.00915026 | 21297686 | 17 | 2.40E-08 | ukb-b-3957 | rs9906181 | G | A | 0.687567 | Sleeplessness / insomnia || id:ukb-b-3957 | TRUE | reported | igd | 6.74E-05 | 31.1796606 |
| 462341 | 0.00192518 | 0.0156393 | 53057188 | 18 | 4.50E-16 | ukb-b-3957 | rs11152363 | A | G | 0.186319 | Sleeplessness / insomnia || id:ukb-b-3957 | TRUE | reported | igd | 0.000142714 | 65.99181298 |
| 462341 | 0.00153044 | 0.00930932 | 37673953 | 19 | 1.20E-09 | ukb-b-3957 | rs56330606 | G | A | 0.378954 | Sleeplessness / insomnia || id:ukb-b-3957 | TRUE | reported | igd | 8.00E-05 | 36.99997439 |
| Nap during day | 337074 | 0.00192353 | -0.0120801 | 33231694 | 1 | 3.39E-10 | ukb-a-12 | rs60579048 | G | T | 0.168441 | Nap during day || id:ukb-a-12 | TRUE | reported | igd | 0.000116995 | 39.44033125 |
| 337074 | 0.00249768 | -0.0267869 | 62579891 | 1 | 7.87E-27 | ukb-a-12 | rs12140153 | T | G | 0.0967607 | Nap during day || id:ukb-a-12 | TRUE | reported | igd | 0.000341113 | 115.0187765 |
| 337074 | 0.00144695 | 0.0080935 | 98589715 | 1 | 2.23E-08 | ukb-a-12 | rs1843815 | T | A | 0.546169 | Nap during day || id:ukb-a-12 | TRUE | reported | igd | 9.28E-05 | 31.28694199 |
| 337074 | 0.00250586 | 0.0144459 | 171516863 | 1 | 8.18E-09 | ukb-a-12 | rs35039375 | G | A | 0.0922067 | Nap during day || id:ukb-a-12 | TRUE | reported | igd | 9.86E-05 | 33.23326603 |
| 337074 | 0.00152035 | -0.0153252 | 201860626 | 1 | 6.82E-24 | ukb-a-12 | rs2250377 | G | A | 0.661574 | Nap during day || id:ukb-a-12 | TRUE | reported | igd | 0.000301348 | 101.6067519 |
| 337074 | 0.00215139 | -0.0117463 | 190410223 | 1 | 4.77E-08 | ukb-a-12 | rs17369061 | C | T | 0.128356 | Nap during day || id:ukb-a-12 | TRUE | reported | igd | 8.84E-05 | 29.80995421 |
| 337074 | 0.00143818 | 0.00900348 | 49436589 | 2 | 3.85E-10 | ukb-a-12 | rs4971718 | T | C | 0.501816 | Nap during day || id:ukb-a-12 | TRUE | reported | igd | 0.000116257 | 39.19148699 |
| 337074 | 0.00216027 | -0.0125148 | 169091942 | 2 | 6.91E-09 | ukb-a-12 | rs2390669 | C | A | 0.128988 | Nap during day || id:ukb-a-12 | TRUE | reported | igd | 9.96E-05 | 33.56055861 |
| 337074 | 0.00204936 | -0.0146443 | 59478517 | 2 | 8.96E-13 | ukb-a-12 | rs11125776 | G | T | 0.145705 | Nap during day || id:ukb-a-12 | TRUE | reported | igd | 0.000151464 | 51.06203829 |
| 337074 | 0.00227285 | 0.0127252 | 164550970 | 2 | 2.16E-08 | ukb-a-12 | rs12615434 | T | C | 0.113286 | Nap during day || id:ukb-a-12 | TRUE | reported | igd | 9.30E-05 | 31.34621494 |
| 337074 | 0.00146731 | -0.0110406 | 236800163 | 2 | 5.31E-14 | ukb-a-12 | rs908442 | T | A | 0.408422 | Nap during day || id:ukb-a-12 | TRUE | reported | igd | 0.000167936 | 56.61597879 |
| 337074 | 0.00160282 | 0.01082 | 23611438 | 2 | 1.47E-11 | ukb-a-12 | rs13033444 | G | A | 0.283377 | Nap during day || id:ukb-a-12 | TRUE | reported | igd | 0.000135176 | 45.57035784 |
| 337074 | 0.0018335 | 0.0103879 | 138097313 | 3 | 1.47E-08 | ukb-a-12 | rs253662 | C | T | 0.810216 | Nap during day || id:ukb-a-12 | TRUE | reported | igd | 9.52E-05 | 32.09897134 |
| 337074 | 0.00144688 | -0.00892164 | 170259647 | 4 | 7.01E-10 | ukb-a-12 | rs12506659 | T | C | 0.485703 | Nap during day || id:ukb-a-12 | TRUE | reported | igd | 0.000112785 | 38.02084686 |
| 337074 | 0.00166173 | 0.0122474 | 79551592 | 4 | 1.71E-13 | ukb-a-12 | rs6854055 | T | G | 0.746635 | Nap during day || id:ukb-a-12 | TRUE | reported | igd | 0.000161128 | 54.3205685 |
| 337074 | 0.0014414 | -0.00800284 | 112029044 | 5 | 2.82E-08 | ukb-a-12 | rs1968557 | T | C | 0.494653 | Nap during day || id:ukb-a-12 | TRUE | reported | igd | 9.14E-05 | 30.82596323 |
| 337074 | 0.00153176 | 0.013171 | 103947968 | 5 | 8.10E-18 | ukb-a-12 | rs2431108 | C | T | 0.329053 | Nap during day || id:ukb-a-12 | TRUE | reported | igd | 0.000219298 | 73.93557829 |
| 337074 | 0.00145848 | 0.00979286 | 146693062 | 5 | 1.89E-11 | ukb-a-12 | rs10875622 | A | G | 0.575866 | Nap during day || id:ukb-a-12 | TRUE | reported | igd | 0.000133732 | 45.08328554 |
| 337074 | 0.00148994 | -0.0102286 | 37691626 | 6 | 6.65E-12 | ukb-a-12 | rs742787 | C | T | 0.370452 | Nap during day || id:ukb-a-12 | TRUE | reported | igd | 0.000139801 | 47.1294373 |
| 337074 | 0.00153092 | -0.00979444 | 84325184 | 6 | 1.58E-10 | ukb-a-12 | rs12193281 | C | T | 0.331103 | Nap during day || id:ukb-a-12 | TRUE | reported | igd | 0.000121416 | 40.93093353 |
| 337074 | 0.00174928 | -0.0166983 | 55142337 | 6 | 1.36E-21 | ukb-a-12 | rs2653349 | G | A | 0.783617 | Nap during day || id:ukb-a-12 | TRUE | reported | igd | 0.000270261 | 91.12200773 |
| 337074 | 0.00148376 | 0.0120846 | 124920871 | 6 | 3.82E-16 | ukb-a-12 | rs614987 | C | A | 0.61521 | Nap during day || id:ukb-a-12 | TRUE | reported | igd | 0.000196755 | 66.3337676 |
| 337074 | 0.00171574 | 0.0108149 | 106954879 | 7 | 2.92E-10 | ukb-a-12 | rs11761181 | C | T | 0.228682 | Nap during day || id:ukb-a-12 | TRUE | reported | igd | 0.00011786 | 39.73191399 |
| 337074 | 0.00255031 | -0.014507 | 99053816 | 7 | 1.28E-08 | ukb-a-12 | rs12535424 | A | G | 0.087217 | Nap during day || id:ukb-a-12 | TRUE | reported | igd | 9.60E-05 | 32.35688442 |
| 337074 | 0.00144812 | -0.00867653 | 106087862 | 8 | 2.08E-09 | ukb-a-12 | rs285793 | A | G | 0.538181 | Nap during day || id:ukb-a-12 | TRUE | reported | igd | 0.000106491 | 35.89884413 |
| 337074 | 0.00144244 | -0.00789435 | 67380139 | 8 | 4.43E-08 | ukb-a-12 | rs2555571 | G | T | 0.519615 | Nap during day || id:ukb-a-12 | TRUE | reported | igd | 8.89E-05 | 29.9526094 |
| 337074 | 0.00178528 | 0.0141577 | 81739686 | 9 | 2.19E-15 | ukb-a-12 | rs11138082 | C | T | 0.204972 | Nap during day || id:ukb-a-12 | TRUE | reported | igd | 0.000186538 | 62.88834338 |
| 337074 | 0.00165954 | -0.0101414 | 86465369 | 9 | 9.91E-10 | ukb-a-12 | rs12682981 | G | A | 0.254182 | Nap during day || id:ukb-a-12 | TRUE | reported | igd | 0.000110776 | 37.343739 |
| 337074 | 0.00181595 | -0.0102645 | 37441650 | 9 | 1.58E-08 | ukb-a-12 | rs17502738 | C | T | 0.195985 | Nap during day || id:ukb-a-12 | TRUE | reported | igd | 9.48E-05 | 31.94958697 |
| 337074 | 0.00169325 | -0.0100428 | 13868855 | 10 | 3.01E-09 | ukb-a-12 | rs11258652 | A | C | 0.237578 | Nap during day || id:ukb-a-12 | TRUE | reported | igd | 0.000104351 | 35.17749277 |
| 337074 | 0.00175656 | -0.0100288 | 8335754 | 11 | 1.14E-08 | ukb-a-12 | rs10840017 | G | A | 0.229946 | Nap during day || id:ukb-a-12 | TRUE | reported | igd | 9.67E-05 | 32.59638107 |
| 337074 | 0.0015721 | -0.0086352 | 29015680 | 11 | 3.96E-08 | ukb-a-12 | rs1836124 | T | C | 0.298829 | Nap during day || id:ukb-a-12 | TRUE | reported | igd | 8.95E-05 | 30.17045704 |
| 337074 | 0.00149822 | 0.0101442 | 61565908 | 11 | 1.28E-11 | ukb-a-12 | rs174541 | C | T | 0.360594 | Nap during day || id:ukb-a-12 | TRUE | reported | igd | 0.000135988 | 45.84393085 |
| 337074 | 0.00163987 | -0.00895823 | 38616581 | 12 | 4.69E-08 | ukb-a-12 | rs35011311 | T | G | 0.266754 | Nap during day || id:ukb-a-12 | TRUE | reported | igd | 8.85E-05 | 29.84166142 |
| 337074 | 0.00147118 | 0.0178914 | 117943058 | 12 | 5.08E-34 | ukb-a-12 | rs1983336 | A | G | 0.405028 | Nap during day || id:ukb-a-12 | TRUE | reported | igd | 0.000438572 | 147.8953261 |
| 337074 | 0.00155807 | 0.0085258 | 107820389 | 13 | 4.45E-08 | ukb-a-12 | rs2769916 | A | G | 0.689264 | Nap during day || id:ukb-a-12 | TRUE | reported | igd | 8.88E-05 | 29.94289404 |
| 337074 | 0.00185585 | 0.0108139 | 29725009 | 14 | 5.65E-09 | ukb-a-12 | rs12147887 | T | C | 0.184888 | Nap during day || id:ukb-a-12 | TRUE | reported | igd | 0.000100719 | 33.95286128 |
| 337074 | 0.00149826 | -0.00835538 | 79602542 | 14 | 2.45E-08 | ukb-a-12 | rs2370926 | C | T | 0.366603 | Nap during day || id:ukb-a-12 | TRUE | reported | igd | 9.23E-05 | 31.09964743 |
| 337074 | 0.00169363 | 0.0104177 | 83235408 | 15 | 7.71E-10 | ukb-a-12 | rs17158413 | A | G | 0.238506 | Nap during day || id:ukb-a-12 | TRUE | reported | igd | 0.000112236 | 37.83589756 |
| 337074 | 0.00220696 | 0.0122401 | 69356694 | 16 | 2.92E-08 | ukb-a-12 | rs114488427 | T | C | 0.120362 | Nap during day || id:ukb-a-12 | TRUE | reported | igd | 9.12E-05 | 30.75944048 |
| 337074 | 0.00143999 | -0.0079374 | 56120461 | 16 | 3.55E-08 | ukb-a-12 | rs8050478 | A | G | 0.500264 | Nap during day || id:ukb-a-12 | TRUE | reported | igd | 9.01E-05 | 30.38330439 |
| 337074 | 0.00172354 | -0.0212106 | 43671099 | 17 | 8.52E-35 | ukb-a-12 | rs2668643 | A | C | 0.225916 | Nap during day || id:ukb-a-12 | TRUE | reported | igd | 0.0004491 | 151.4469728 |
| 337074 | 0.00148611 | 0.00811376 | 64308310 | 17 | 4.77E-08 | ukb-a-12 | rs112520848 | C | G | 0.386015 | Nap during day || id:ukb-a-12 | TRUE | reported | igd | 8.84E-05 | 29.80847958 |
| 337074 | 0.0014508 | 0.00873751 | 79084367 | 17 | 1.72E-09 | ukb-a-12 | rs3935190 | A | G | 0.534346 | Nap during day || id:ukb-a-12 | TRUE | reported | igd | 0.000107594 | 36.2708473 |
| 337074 | 0.00178363 | 0.0110612 | 35595368 | 17 | 5.60E-10 | ukb-a-12 | rs12451365 | C | T | 0.204513 | Nap during day || id:ukb-a-12 | TRUE | reported | igd | 0.000114083 | 38.45850309 |
| 337074 | 0.00144735 | 0.00867968 | 36097882 | 18 | 2.01E-09 | ukb-a-12 | rs2033103 | T | C | 0.452251 | Nap during day || id:ukb-a-12 | TRUE | reported | igd | 0.000106681 | 35.96314966 |
| 337074 | 0.00145269 | -0.00911236 | 23084118 | 18 | 3.55E-10 | ukb-a-12 | rs962247 | A | G | 0.476597 | Nap during day || id:ukb-a-12 | TRUE | reported | igd | 0.000116719 | 39.34714876 |
| 337074 | 0.00145817 | -0.0137289 | 44771481 | 18 | 4.75E-21 | ukb-a-12 | rs17723754 | T | C | 0.427454 | Nap during day || id:ukb-a-12 | TRUE | reported | igd | 0.000262915 | 88.64466205 |
| 337074 | 0.00144848 | -0.0080557 | 62194103 | 20 | 2.68E-08 | ukb-a-12 | rs3810484 | G | A | 0.443578 | Nap during day || id:ukb-a-12 | TRUE | reported | igd | 9.18E-05 | 30.92993348 |
| 337074 | 0.00159998 | 0.00908323 | 40510676 | 21 | 1.37E-08 | ukb-a-12 | rs2836918 | C | T | 0.285281 | Nap during day || id:ukb-a-12 | TRUE | reported | igd | 9.56E-05 | 32.22915639 |
| Chronotype | 413343 | 0.00256295 | -0.0256729 | 7884525 | 1 | 1.30E-23 | ukb-b-4956 | rs61773390 | T | G | 0.195349 | Morning/evening person (chronotype) || id:ukb-b-4956 | TRUE | reported | igd | 0.000242691 | 100.3384735 |
| 413343 | 0.00241443 | -0.0206181 | 91191582 | 1 | 1.30E-17 | ukb-b-4956 | rs72720396 | G | A | 0.229643 | Morning/evening person (chronotype) || id:ukb-b-4956 | TRUE | reported | igd | 0.000176393 | 72.92323804 |
| 413343 | 0.00209801 | 0.014352 | 21199764 | 1 | 7.90E-12 | ukb-b-4956 | rs10737452 | T | C | 0.624486 | Morning/evening person (chronotype) || id:ukb-b-4956 | TRUE | reported | igd | 0.000113201 | 46.79588254 |
| 413343 | 0.0020884 | 0.0121296 | 79867495 | 1 | 6.30E-09 | ukb-b-4956 | rs56372114 | T | C | 0.384232 | Morning/evening person (chronotype) || id:ukb-b-4956 | TRUE | reported | igd | 8.16E-05 | 33.73366192 |
| 413343 | 0.00265737 | -0.0281137 | 77775233 | 1 | 3.70E-26 | ukb-b-4956 | rs7547493 | G | A | 0.177307 | Morning/evening person (chronotype) || id:ukb-b-4956 | TRUE | reported | igd | 0.00027071 | 111.9257093 |
| 413343 | 0.00598009 | 0.0878165 | 182573227 | 1 | 8.10E-49 | ukb-b-4956 | rs509476 | C | T | 0.970151 | Morning/evening person (chronotype) || id:ukb-b-4956 | TRUE | reported | igd | 0.000521434 | 215.6426729 |
| 413343 | 0.00241021 | -0.0164854 | 15966713 | 1 | 7.90E-12 | ukb-b-4956 | rs17448682 | T | C | 0.232109 | Morning/evening person (chronotype) || id:ukb-b-4956 | TRUE | reported | igd | 0.00011317 | 46.78289673 |
| 413343 | 0.00207692 | -0.0120027 | 79387676 | 1 | 7.50E-09 | ukb-b-4956 | rs6658041 | A | G | 0.599474 | Morning/evening person (chronotype) || id:ukb-b-4956 | TRUE | reported | igd | 8.08E-05 | 33.39767732 |
| 413343 | 0.00380244 | 0.0240933 | 179327958 | 1 | 2.40E-10 | ukb-b-4956 | rs12117333 | A | G | 0.077242 | Morning/evening person (chronotype) || id:ukb-b-4956 | TRUE | reported | igd | 9.71E-05 | 40.14816825 |
| 413343 | 0.00357405 | 0.0269965 | 62579891 | 1 | 4.20E-14 | ukb-b-4956 | rs12140153 | T | G | 0.093978 | Morning/evening person (chronotype) || id:ukb-b-4956 | TRUE | reported | igd | 0.000138014 | 57.05471982 |
| 413343 | 0.00410535 | -0.0229312 | 96621739 | 1 | 2.30E-08 | ukb-b-4956 | rs4949980 | G | A | 0.066883 | Morning/evening person (chronotype) || id:ukb-b-4956 | TRUE | reported | igd | 7.55E-05 | 31.19974796 |
| 413343 | 0.00256837 | 0.0160596 | 110086451 | 1 | 4.00E-10 | ukb-b-4956 | rs17575798 | A | G | 0.193371 | Morning/evening person (chronotype) || id:ukb-b-4956 | TRUE | reported | igd | 9.46E-05 | 39.09778641 |
| 413343 | 0.00207298 | -0.0187958 | 150327106 | 1 | 1.20E-19 | ukb-b-4956 | rs11587758 | A | G | 0.396163 | Morning/evening person (chronotype) || id:ukb-b-4956 | TRUE | reported | igd | 0.000198854 | 82.21088149 |
| 413343 | 0.00403864 | 0.0220452 | 196324527 | 1 | 4.80E-08 | ukb-b-4956 | rs111761918 | A | G | 0.068055 | Morning/evening person (chronotype) || id:ukb-b-4956 | TRUE | reported | igd | 7.21E-05 | 29.79584459 |
| 413343 | 0.0020344 | -0.0123111 | 36700580 | 2 | 1.40E-09 | ukb-b-4956 | rs848552 | G | C | 0.527723 | Morning/evening person (chronotype) || id:ukb-b-4956 | TRUE | reported | igd | 8.86E-05 | 36.6200491 |
| 413343 | 0.00204753 | 0.0180322 | 77305160 | 2 | 1.30E-18 | ukb-b-4956 | rs7586062 | C | G | 0.471841 | Morning/evening person (chronotype) || id:ukb-b-4956 | TRUE | reported | igd | 0.000187605 | 77.55946104 |
| 413343 | 0.00203567 | -0.0153086 | 198944654 | 2 | 5.50E-14 | ukb-b-4956 | rs4549082 | C | T | 0.484139 | Morning/evening person (chronotype) || id:ukb-b-4956 | TRUE | reported | igd | 0.0001368 | 56.55279798 |
| 413343 | 0.00239296 | -0.0168735 | 4651923 | 2 | 1.80E-12 | ukb-b-4956 | rs13011556 | G | C | 0.239067 | Morning/evening person (chronotype) || id:ukb-b-4956 | TRUE | reported | igd | 0.000120275 | 49.72071577 |
| 413343 | 0.00372053 | -0.0228637 | 50260406 | 2 | 8.00E-10 | ukb-b-4956 | rs116131939 | T | C | 0.083611 | Morning/evening person (chronotype) || id:ukb-b-4956 | TRUE | reported | igd | 9.14E-05 | 37.76428818 |
| 413343 | 0.00206477 | -0.0123818 | 60495038 | 2 | 2.00E-09 | ukb-b-4956 | rs4671379 | C | T | 0.58559 | Morning/evening person (chronotype) || id:ukb-b-4956 | TRUE | reported | igd | 8.70E-05 | 35.96020054 |
| 413343 | 0.00209794 | -0.0119862 | 76341929 | 2 | 1.10E-08 | ukb-b-4956 | rs6718119 | G | A | 0.376746 | Morning/evening person (chronotype) || id:ukb-b-4956 | TRUE | reported | igd | 7.90E-05 | 32.64185353 |
| 413343 | 0.0043341 | -0.0256922 | 206908054 | 2 | 3.10E-09 | ukb-b-4956 | rs138964083 | T | C | 0.058599 | Morning/evening person (chronotype) || id:ukb-b-4956 | TRUE | reported | igd | 8.50E-05 | 35.14007077 |
| 413343 | 0.00362263 | 0.0410747 | 239311369 | 2 | 8.50E-30 | ukb-b-4956 | rs57435966 | T | C | 0.08629 | Morning/evening person (chronotype) || id:ukb-b-4956 | TRUE | reported | igd | 0.000310925 | 128.5578913 |
| 413343 | 0.00436185 | 0.0262121 | 48986474 | 2 | 1.90E-09 | ukb-b-4956 | rs12713014 | G | A | 0.058725 | Morning/evening person (chronotype) || id:ukb-b-4956 | TRUE | reported | igd | 8.74E-05 | 36.11270979 |
| 413343 | 0.00265358 | -0.0183756 | 59429807 | 2 | 4.40E-12 | ukb-b-4956 | rs10175975 | T | C | 0.181726 | Morning/evening person (chronotype) || id:ukb-b-4956 | TRUE | reported | igd | 0.000116 | 47.95308865 |
| 413343 | 0.00210437 | 0.0154008 | 144232491 | 2 | 2.50E-13 | ukb-b-4956 | rs28380327 | T | A | 0.369986 | Morning/evening person (chronotype) || id:ukb-b-4956 | TRUE | reported | igd | 0.000129561 | 53.5599616 |
| 413343 | 0.00204052 | 0.0120956 | 161894663 | 2 | 3.10E-09 | ukb-b-4956 | rs197273 | G | A | 0.529834 | Morning/evening person (chronotype) || id:ukb-b-4956 | TRUE | reported | igd | 8.50E-05 | 35.13751303 |
| 413343 | 0.00902627 | -0.0493504 | 239353793 | 2 | 4.60E-08 | ukb-b-4956 | rs114870822 | A | G | 0.012965 | Morning/evening person (chronotype) || id:ukb-b-4956 | TRUE | reported | igd | 7.23E-05 | 29.89252577 |
| 413343 | 0.00214181 | 0.0132852 | 240266397 | 2 | 5.50E-10 | ukb-b-4956 | rs62182115 | T | C | 0.341565 | Morning/evening person (chronotype) || id:ukb-b-4956 | TRUE | reported | igd | 9.31E-05 | 38.47443123 |
| 413343 | 0.00261566 | -0.0157302 | 23959131 | 2 | 1.80E-09 | ukb-b-4956 | rs2712056 | T | C | 0.185573 | Morning/evening person (chronotype) || id:ukb-b-4956 | TRUE | reported | igd | 8.75E-05 | 36.16627711 |
| 413343 | 0.00221403 | -0.0186925 | 44731590 | 2 | 3.10E-17 | ukb-b-4956 | rs2850298 | G | A | 0.698902 | Morning/evening person (chronotype) || id:ukb-b-4956 | TRUE | reported | igd | 0.000172418 | 71.27966907 |
| 413343 | 0.00212493 | -0.0151176 | 61680993 | 2 | 1.10E-12 | ukb-b-4956 | rs812925 | G | C | 0.351718 | Morning/evening person (chronotype) || id:ukb-b-4956 | TRUE | reported | igd | 0.000122437 | 50.61442912 |
| 413343 | 0.00207674 | 0.0118177 | 186189829 | 2 | 1.30E-08 | ukb-b-4956 | rs62198772 | A | T | 0.410702 | Morning/evening person (chronotype) || id:ukb-b-4956 | TRUE | reported | igd | 7.83E-05 | 32.38169401 |
| 413343 | 0.00284507 | 0.0180336 | 70488470 | 2 | 2.30E-10 | ukb-b-4956 | rs2706762 | T | C | 0.149575 | Morning/evening person (chronotype) || id:ukb-b-4956 | TRUE | reported | igd | 9.72E-05 | 40.1769395 |
| 413343 | 0.00274705 | 0.0163112 | 2550093 | 3 | 2.90E-09 | ukb-b-4956 | rs17786957 | C | G | 0.16512 | Morning/evening person (chronotype) || id:ukb-b-4956 | TRUE | reported | igd | 8.53E-05 | 35.25628887 |
| 413343 | 0.00662279 | -0.041456 | 36859494 | 3 | 3.90E-10 | ukb-b-4956 | rs114848860 | T | A | 0.024346 | Morning/evening person (chronotype) || id:ukb-b-4956 | TRUE | reported | igd | 9.48E-05 | 39.18237179 |
| 413343 | 0.00421866 | -0.0285588 | 47586100 | 3 | 1.30E-11 | ukb-b-4956 | rs112555644 | T | C | 0.067556 | Morning/evening person (chronotype) || id:ukb-b-4956 | TRUE | reported | igd | 0.000110859 | 45.82777355 |
| 413343 | 0.00277482 | 0.016002 | 50571585 | 3 | 8.10E-09 | ukb-b-4956 | rs7652260 | G | C | 0.161797 | Morning/evening person (chronotype) || id:ukb-b-4956 | TRUE | reported | igd | 8.05E-05 | 33.25651972 |
| 413343 | 0.00233302 | -0.0135195 | 63564385 | 3 | 6.80E-09 | ukb-b-4956 | rs13316611 | T | G | 0.255868 | Morning/evening person (chronotype) || id:ukb-b-4956 | TRUE | reported | igd | 8.12E-05 | 33.58011934 |
| 413343 | 0.00207554 | 0.0117967 | 123158946 | 3 | 1.30E-08 | ukb-b-4956 | rs11714441 | T | C | 0.400637 | Morning/evening person (chronotype) || id:ukb-b-4956 | TRUE | reported | igd | 7.81E-05 | 32.30403363 |
| 413343 | 0.00223179 | -0.0125384 | 138130484 | 3 | 1.90E-08 | ukb-b-4956 | rs7626349 | C | T | 0.705763 | Morning/evening person (chronotype) || id:ukb-b-4956 | TRUE | reported | igd | 7.64E-05 | 31.56279722 |
| 413343 | 0.00224924 | 0.0124769 | 172339648 | 3 | 2.90E-08 | ukb-b-4956 | rs34244172 | T | C | 0.292264 | Morning/evening person (chronotype) || id:ukb-b-4956 | TRUE | reported | igd | 7.44E-05 | 30.77086399 |
| 413343 | 0.0022141 | -0.0139103 | 185998884 | 3 | 3.30E-10 | ukb-b-4956 | rs2239626 | C | T | 0.305676 | Morning/evening person (chronotype) || id:ukb-b-4956 | TRUE | reported | igd | 9.55E-05 | 39.47084533 |
| 413343 | 0.00289542 | -0.016178 | 157805411 | 3 | 2.30E-08 | ukb-b-4956 | rs6441169 | A | G | 0.856023 | Morning/evening person (chronotype) || id:ukb-b-4956 | TRUE | reported | igd | 7.55E-05 | 31.21939056 |
| 413343 | 0.0021483 | -0.0138691 | 160755062 | 3 | 1.10E-10 | ukb-b-4956 | rs9831488 | G | A | 0.353395 | Morning/evening person (chronotype) || id:ukb-b-4956 | TRUE | reported | igd | 0.000100821 | 41.6777822 |
| 413343 | 0.00225053 | 0.0130204 | 14394752 | 3 | 7.20E-09 | ukb-b-4956 | rs6442446 | G | A | 0.708837 | Morning/evening person (chronotype) || id:ukb-b-4956 | TRUE | reported | igd | 8.10E-05 | 33.47163587 |
| 413343 | 0.0020796 | -0.0133068 | 77215327 | 3 | 1.60E-10 | ukb-b-4956 | rs66710942 | T | C | 0.592333 | Morning/evening person (chronotype) || id:ukb-b-4956 | TRUE | reported | igd | 9.90E-05 | 40.94355422 |
| 413343 | 0.00219015 | 0.0136358 | 182257586 | 3 | 4.80E-10 | ukb-b-4956 | rs4484214 | G | A | 0.314742 | Morning/evening person (chronotype) || id:ukb-b-4956 | TRUE | reported | igd | 9.38E-05 | 38.76246829 |
| 413343 | 0.00233756 | 0.0131149 | 113891549 | 3 | 2.00E-08 | ukb-b-4956 | rs1800828 | G | C | 0.253098 | Morning/evening person (chronotype) || id:ukb-b-4956 | TRUE | reported | igd | 7.61E-05 | 31.47765212 |
| 413343 | 0.00954645 | 0.0585049 | 8817423 | 3 | 8.90E-10 | ukb-b-4956 | rs149611468 | C | T | 0.011957 | Morning/evening person (chronotype) || id:ukb-b-4956 | TRUE | reported | igd | 9.09E-05 | 37.55766439 |
| 413343 | 0.00204675 | -0.0133959 | 24935790 | 3 | 6.00E-11 | ukb-b-4956 | rs13059636 | G | A | 0.469784 | Morning/evening person (chronotype) || id:ukb-b-4956 | TRUE | reported | igd | 0.000103624 | 42.83631409 |
| 413343 | 0.00240488 | 0.0172702 | 83284422 | 4 | 6.90E-13 | ukb-b-4956 | rs1135946 | C | T | 0.232423 | Morning/evening person (chronotype) || id:ukb-b-4956 | TRUE | reported | igd | 0.000124751 | 51.57103072 |
| 413343 | 0.00204725 | -0.015226 | 137053959 | 4 | 1.00E-13 | ukb-b-4956 | rs4241964 | G | T | 0.475791 | Morning/evening person (chronotype) || id:ukb-b-4956 | TRUE | reported | igd | 0.000133802 | 55.31307338 |
| 413343 | 0.00222077 | 0.013099 | 35220404 | 5 | 3.70E-09 | ukb-b-4956 | rs10058356 | T | C | 0.697815 | Morning/evening person (chronotype) || id:ukb-b-4956 | TRUE | reported | igd | 8.42E-05 | 34.79100857 |
| 413343 | 0.00236044 | 0.0162874 | 87603572 | 5 | 5.20E-12 | ukb-b-4956 | rs147762489 | T | C | 0.249106 | Morning/evening person (chronotype) || id:ukb-b-4956 | TRUE | reported | igd | 0.000115175 | 47.61189773 |
| 413343 | 0.00220996 | 0.0123205 | 19071940 | 5 | 2.50E-08 | ukb-b-4956 | rs10461917 | C | T | 0.689585 | Morning/evening person (chronotype) || id:ukb-b-4956 | TRUE | reported | igd | 7.52E-05 | 31.08033839 |
| 413343 | 0.0020348 | -0.015264 | 88157552 | 5 | 6.30E-14 | ukb-b-4956 | rs4518438 | C | T | 0.510399 | Morning/evening person (chronotype) || id:ukb-b-4956 | TRUE | reported | igd | 0.000136121 | 56.27184509 |
| 413343 | 0.00204007 | 0.0117126 | 107459376 | 5 | 9.40E-09 | ukb-b-4956 | rs286808 | C | T | 0.524555 | Morning/evening person (chronotype) || id:ukb-b-4956 | TRUE | reported | igd | 7.97E-05 | 32.96206287 |
| 413343 | 0.00238253 | -0.0133858 | 63842133 | 5 | 1.90E-08 | ukb-b-4956 | rs9291813 | C | T | 0.760663 | Morning/evening person (chronotype) || id:ukb-b-4956 | TRUE | reported | igd | 7.64E-05 | 31.56529167 |
| 413343 | 0.00203726 | -0.0139969 | 104042643 | 5 | 6.40E-12 | ukb-b-4956 | rs1976423 | C | A | 0.495282 | Morning/evening person (chronotype) || id:ukb-b-4956 | TRUE | reported | igd | 0.000114185 | 47.20290224 |
| 413343 | 0.00218678 | -0.0187173 | 152204741 | 5 | 1.10E-17 | ukb-b-4956 | rs67988891 | G | C | 0.318639 | Morning/evening person (chronotype) || id:ukb-b-4956 | TRUE | reported | igd | 0.00017721 | 73.26121461 |
| 413343 | 0.0025788 | -0.0151744 | 175339984 | 5 | 4.00E-09 | ukb-b-4956 | rs7735794 | A | G | 0.223944 | Morning/evening person (chronotype) || id:ukb-b-4956 | TRUE | reported | igd | 8.38E-05 | 34.62466909 |
| 413343 | 0.00249762 | -0.0146358 | 153107770 | 6 | 4.60E-09 | ukb-b-4956 | rs610590 | G | C | 0.211955 | Morning/evening person (chronotype) || id:ukb-b-4956 | TRUE | reported | igd | 8.31E-05 | 34.33824573 |
| 413343 | 0.00975491 | -0.0798575 | 153136141 | 6 | 2.70E-16 | ukb-b-4956 | rs76223855 | C | T | 0.010981 | Morning/evening person (chronotype) || id:ukb-b-4956 | TRUE | reported | igd | 0.000162108 | 67.01666087 |
| 413343 | 0.00204528 | 0.0122911 | 165236239 | 6 | 1.90E-09 | ukb-b-4956 | rs12525312 | C | T | 0.550602 | Morning/evening person (chronotype) || id:ukb-b-4956 | TRUE | reported | igd | 8.74E-05 | 36.1138558 |
| 413343 | 0.00221234 | -0.0173714 | 13183523 | 6 | 4.10E-15 | ukb-b-4956 | rs9395520 | T | C | 0.304164 | Morning/evening person (chronotype) || id:ukb-b-4956 | TRUE | reported | igd | 0.000149139 | 61.65436038 |
| 413343 | 0.00376113 | 0.0244145 | 110235958 | 6 | 8.50E-11 | ukb-b-4956 | rs35101255 | G | A | 0.079468 | Morning/evening person (chronotype) || id:ukb-b-4956 | TRUE | reported | igd | 0.00010193 | 42.13634666 |
| 413343 | 0.0020362 | 0.0124568 | 166263488 | 6 | 9.50E-10 | ukb-b-4956 | rs9348050 | C | T | 0.510601 | Morning/evening person (chronotype) || id:ukb-b-4956 | TRUE | reported | igd | 9.05E-05 | 37.42570722 |
| 413343 | 0.00210256 | 0.0115784 | 31856070 | 6 | 3.70E-08 | ukb-b-4956 | rs486416 | A | G | 0.636771 | Morning/evening person (chronotype) || id:ukb-b-4956 | TRUE | reported | igd | 7.34E-05 | 30.32481785 |
| 413343 | 0.00224143 | 0.0129088 | 41536427 | 6 | 8.50E-09 | ukb-b-4956 | rs1983891 | T | C | 0.276348 | Morning/evening person (chronotype) || id:ukb-b-4956 | TRUE | reported | igd | 8.02E-05 | 33.16799981 |
| 413343 | 0.0024837 | 0.0283958 | 55142337 | 6 | 2.90E-30 | ukb-b-4956 | rs2653349 | G | A | 0.787049 | Morning/evening person (chronotype) || id:ukb-b-4956 | TRUE | reported | igd | 0.000316127 | 130.709707 |
| 413343 | 0.00203934 | -0.0126008 | 57767576 | 6 | 6.50E-10 | ukb-b-4956 | rs9476310 | T | C | 0.51056 | Morning/evening person (chronotype) || id:ukb-b-4956 | TRUE | reported | igd | 9.24E-05 | 38.17814827 |
| 413343 | 0.00227345 | -0.0136327 | 72479263 | 6 | 2.00E-09 | ukb-b-4956 | rs2881955 | T | C | 0.278459 | Morning/evening person (chronotype) || id:ukb-b-4956 | TRUE | reported | igd | 8.70E-05 | 35.95761183 |
| 413343 | 0.00222228 | -0.0121719 | 71652312 | 7 | 4.30E-08 | ukb-b-4956 | rs1996399 | A | G | 0.300648 | Morning/evening person (chronotype) || id:ukb-b-4956 | TRUE | reported | igd | 7.26E-05 | 29.99971263 |
| 413343 | 0.00222883 | 0.0189794 | 101637753 | 7 | 1.70E-17 | ukb-b-4956 | rs202157 | T | C | 0.701066 | Morning/evening person (chronotype) || id:ukb-b-4956 | TRUE | reported | igd | 0.000175398 | 72.5118469 |
| 413343 | 0.00246689 | 0.0151566 | 133643778 | 7 | 8.00E-10 | ukb-b-4956 | rs2971970 | G | T | 0.782046 | Morning/evening person (chronotype) || id:ukb-b-4956 | TRUE | reported | igd | 9.13E-05 | 37.74869202 |
| 413343 | 0.0021211 | 0.0153426 | 32261458 | 7 | 4.70E-13 | ukb-b-4956 | rs17161045 | C | T | 0.369932 | Morning/evening person (chronotype) || id:ukb-b-4956 | TRUE | reported | igd | 0.000126564 | 52.32069881 |
| 413343 | 0.00208203 | 0.0216699 | 102383663 | 7 | 2.30E-25 | ukb-b-4956 | rs4729854 | A | T | 0.482 | Morning/evening person (chronotype) || id:ukb-b-4956 | TRUE | reported | igd | 0.000262009 | 108.3272572 |
| 413343 | 0.00207487 | -0.0121216 | 114116881 | 7 | 5.20E-09 | ukb-b-4956 | rs7783012 | A | G | 0.590654 | Morning/evening person (chronotype) || id:ukb-b-4956 | TRUE | reported | igd | 8.26E-05 | 34.12997838 |
| 413343 | 0.00220293 | 0.0133149 | 24082063 | 7 | 1.50E-09 | ukb-b-4956 | rs10280205 | C | T | 0.309279 | Morning/evening person (chronotype) || id:ukb-b-4956 | TRUE | reported | igd | 8.84E-05 | 36.53190522 |
| 413343 | 0.0020431 | -0.0155247 | 50642701 | 7 | 3.00E-14 | ukb-b-4956 | rs6967481 | T | C | 0.497073 | Morning/evening person (chronotype) || id:ukb-b-4956 | TRUE | reported | igd | 0.000139668 | 57.73844511 |
| 413343 | 0.00206223 | -0.0154825 | 33667730 | 8 | 6.00E-14 | ukb-b-4956 | rs10954933 | G | A | 0.42758 | Morning/evening person (chronotype) || id:ukb-b-4956 | TRUE | reported | igd | 0.000136345 | 56.36452808 |
| 413343 | 0.00263064 | -0.0165403 | 53145698 | 8 | 3.20E-10 | ukb-b-4956 | rs769066 | C | T | 0.18416 | Morning/evening person (chronotype) || id:ukb-b-4956 | TRUE | reported | igd | 9.56E-05 | 39.53318678 |
| 413343 | 0.00208964 | 0.0122033 | 101967139 | 8 | 5.20E-09 | ukb-b-4956 | rs3100052 | G | A | 0.613151 | Morning/evening person (chronotype) || id:ukb-b-4956 | TRUE | reported | igd | 8.25E-05 | 34.10433051 |
| 413343 | 0.00271665 | -0.0158848 | 89399461 | 8 | 5.00E-09 | ukb-b-4956 | rs13258797 | A | G | 0.168546 | Morning/evening person (chronotype) || id:ukb-b-4956 | TRUE | reported | igd | 8.27E-05 | 34.18960014 |
| 413343 | 0.00254156 | -0.018837 | 116659731 | 8 | 1.20E-13 | ukb-b-4956 | rs17716502 | T | C | 0.204456 | Morning/evening person (chronotype) || id:ukb-b-4956 | TRUE | reported | igd | 0.000132878 | 54.93139657 |
| 413343 | 0.00245224 | 0.0172055 | 76614958 | 8 | 2.30E-12 | ukb-b-4956 | rs4321976 | C | T | 0.221209 | Morning/evening person (chronotype) || id:ukb-b-4956 | TRUE | reported | igd | 0.000119082 | 49.2273605 |
| 413343 | 0.00212995 | -0.012109 | 4823608 | 8 | 1.30E-08 | ukb-b-4956 | rs35524253 | A | G | 0.356248 | Morning/evening person (chronotype) || id:ukb-b-4956 | TRUE | reported | igd | 7.82E-05 | 32.32031909 |
| 413343 | 0.00208275 | 0.0137112 | 8148568 | 8 | 4.60E-11 | ukb-b-4956 | rs6601686 | T | A | 0.410116 | Morning/evening person (chronotype) || id:ukb-b-4956 | TRUE | reported | igd | 0.000104838 | 43.33856667 |
| 413343 | 0.00236169 | 0.0155356 | 8417501 | 9 | 4.80E-11 | ukb-b-4956 | rs12377175 | C | A | 0.22858 | Morning/evening person (chronotype) || id:ukb-b-4956 | TRUE | reported | igd | 0.000104678 | 43.2721206 |
| 413343 | 0.00206881 | 0.012885 | 131943440 | 9 | 4.70E-10 | ukb-b-4956 | rs10988239 | T | C | 0.512284 | Morning/evening person (chronotype) || id:ukb-b-4956 | TRUE | reported | igd | 9.38E-05 | 38.79051369 |
| 413343 | 0.00558132 | 0.0379349 | 76679777 | 9 | 1.10E-11 | ukb-b-4956 | rs62553781 | T | C | 0.034554 | Morning/evening person (chronotype) || id:ukb-b-4956 | TRUE | reported | igd | 0.000111749 | 46.19574118 |
| 413343 | 0.00319962 | 0.0181433 | 127031790 | 9 | 1.40E-08 | ukb-b-4956 | rs113171806 | C | T | 0.11444 | Morning/evening person (chronotype) || id:ukb-b-4956 | TRUE | reported | igd | 7.78E-05 | 32.15389998 |
| 413343 | 0.00309799 | 0.0298802 | 140257189 | 9 | 5.20E-22 | ukb-b-4956 | rs28458909 | T | C | 0.122383 | Morning/evening person (chronotype) || id:ukb-b-4956 | TRUE | reported | igd | 0.000225008 | 93.02611317 |
| 413343 | 0.00209801 | 0.0151909 | 37079661 | 9 | 4.50E-13 | ukb-b-4956 | rs2291589 | G | T | 0.377049 | Morning/evening person (chronotype) || id:ukb-b-4956 | TRUE | reported | igd | 0.00012682 | 52.42637148 |
| 413343 | 0.0025533 | 0.0139673 | 126523296 | 9 | 4.50E-08 | ukb-b-4956 | rs10118767 | T | C | 0.197744 | Morning/evening person (chronotype) || id:ukb-b-4956 | TRUE | reported | igd | 7.24E-05 | 29.9239645 |
| 413343 | 0.00221782 | -0.0128023 | 139356987 | 9 | 7.80E-09 | ukb-b-4956 | rs57994353 | C | T | 0.299321 | Morning/evening person (chronotype) || id:ukb-b-4956 | TRUE | reported | igd | 8.06E-05 | 33.32125172 |
| 413343 | 0.00232708 | 0.0148125 | 60568697 | 10 | 1.90E-10 | ukb-b-4956 | rs2893787 | A | G | 0.743579 | Morning/evening person (chronotype) || id:ukb-b-4956 | TRUE | reported | igd | 9.80E-05 | 40.5165071 |
| 413343 | 0.00331917 | 0.018994 | 64301941 | 10 | 1.00E-08 | ukb-b-4956 | rs12249410 | T | G | 0.109634 | Morning/evening person (chronotype) || id:ukb-b-4956 | TRUE | reported | igd | 7.92E-05 | 32.74701909 |
| 413343 | 0.00211446 | -0.0121189 | 125426627 | 10 | 1.00E-08 | ukb-b-4956 | rs3808964 | T | G | 0.633453 | Morning/evening person (chronotype) || id:ukb-b-4956 | TRUE | reported | igd | 7.95E-05 | 32.84924215 |
| 413343 | 0.00336816 | 0.0211605 | 43884417 | 11 | 3.30E-10 | ukb-b-4956 | rs1914772 | A | T | 0.894653 | Morning/evening person (chronotype) || id:ukb-b-4956 | TRUE | reported | igd | 9.55E-05 | 39.46974509 |
| 413343 | 0.00214398 | -0.0136292 | 114009982 | 11 | 2.10E-10 | ukb-b-4956 | rs4936291 | G | A | 0.389142 | Morning/evening person (chronotype) || id:ukb-b-4956 | TRUE | reported | igd | 9.78E-05 | 40.41077396 |
| 413343 | 0.00312645 | 0.0202381 | 122811822 | 11 | 9.60E-11 | ukb-b-4956 | rs74357745 | G | A | 0.12053 | Morning/evening person (chronotype) || id:ukb-b-4956 | TRUE | reported | igd | 0.000101364 | 41.90196584 |
| 413343 | 0.0025608 | 0.0147756 | 1483543 | 11 | 7.90E-09 | ukb-b-4956 | rs9795439 | G | A | 0.803776 | Morning/evening person (chronotype) || id:ukb-b-4956 | TRUE | reported | igd | 8.05E-05 | 33.29176554 |
| 413343 | 0.00204526 | 0.0116524 | 30449319 | 11 | 1.20E-08 | ukb-b-4956 | rs4141920 | A | G | 0.455163 | Morning/evening person (chronotype) || id:ukb-b-4956 | TRUE | reported | igd | 7.85E-05 | 32.45873709 |
| 413343 | 0.00229973 | -0.013398 | 66621383 | 11 | 5.70E-09 | ukb-b-4956 | rs2077432 | T | C | 0.269742 | Morning/evening person (chronotype) || id:ukb-b-4956 | TRUE | reported | igd | 8.21E-05 | 33.94096175 |
| 413343 | 0.00334958 | -0.018897 | 47371598 | 11 | 1.70E-08 | ukb-b-4956 | rs3729986 | T | C | 0.10224 | Morning/evening person (chronotype) || id:ukb-b-4956 | TRUE | reported | igd | 7.70E-05 | 31.82752847 |
| 413343 | 0.00203815 | -0.0117019 | 92725803 | 11 | 9.40E-09 | ukb-b-4956 | rs4237555 | T | C | 0.527732 | Morning/evening person (chronotype) || id:ukb-b-4956 | TRUE | reported | igd | 7.97E-05 | 32.96388399 |
| 413343 | 0.0027028 | 0.0165475 | 16615883 | 11 | 9.20E-10 | ukb-b-4956 | rs72632979 | G | A | 0.172073 | Morning/evening person (chronotype) || id:ukb-b-4956 | TRUE | reported | igd | 9.07E-05 | 37.48304442 |
| 413343 | 0.00231806 | 0.0129008 | 27650524 | 11 | 2.60E-08 | ukb-b-4956 | rs10742179 | G | A | 0.739373 | Morning/evening person (chronotype) || id:ukb-b-4956 | TRUE | reported | igd | 7.49E-05 | 30.97289767 |
| 413343 | 0.00353388 | -0.0262159 | 33759092 | 11 | 1.20E-13 | ukb-b-4956 | rs11032362 | A | G | 0.090981 | Morning/evening person (chronotype) || id:ukb-b-4956 | TRUE | reported | igd | 0.000133124 | 55.03308338 |
| 413343 | 0.00237964 | 0.0149704 | 58386177 | 11 | 3.20E-10 | ukb-b-4956 | rs3168135 | A | G | 0.24042 | Morning/evening person (chronotype) || id:ukb-b-4956 | TRUE | reported | igd | 9.57E-05 | 39.57693766 |
| 413343 | 0.00204647 | 0.0129567 | 24066937 | 12 | 2.40E-10 | ukb-b-4956 | rs12811046 | G | A | 0.445344 | Morning/evening person (chronotype) || id:ukb-b-4956 | TRUE | reported | igd | 9.70E-05 | 40.08445101 |
| 413343 | 0.00206713 | 0.0180145 | 38289817 | 12 | 2.90E-18 | ukb-b-4956 | rs11181153 | T | C | 0.586892 | Morning/evening person (chronotype) || id:ukb-b-4956 | TRUE | reported | igd | 0.000183704 | 75.94632161 |
| 413343 | 0.00203888 | 0.0227532 | 39225991 | 12 | 6.40E-29 | ukb-b-4956 | rs4595586 | T | A | 0.506544 | Morning/evening person (chronotype) || id:ukb-b-4956 | TRUE | reported | igd | 0.000301204 | 124.5373257 |
| 413343 | 0.0020962 | -0.0147475 | 34018179 | 12 | 2.00E-12 | ukb-b-4956 | rs7308565 | T | C | 0.399536 | Morning/evening person (chronotype) || id:ukb-b-4956 | TRUE | reported | igd | 0.000119732 | 49.49590563 |
| 413343 | 0.00228303 | -0.0147233 | 106989915 | 12 | 1.10E-10 | ukb-b-4956 | rs7304278 | G | A | 0.723741 | Morning/evening person (chronotype) || id:ukb-b-4956 | TRUE | reported | igd | 0.000100608 | 41.58962309 |
| 413343 | 0.00345166 | 0.0223132 | 121029604 | 12 | 1.00E-10 | ukb-b-4956 | rs80097534 | T | G | 0.098204 | Morning/evening person (chronotype) || id:ukb-b-4956 | TRUE | reported | igd | 0.000101091 | 41.78934802 |
| 413343 | 0.00207866 | 0.0142231 | 38033268 | 12 | 7.80E-12 | ukb-b-4956 | rs7316768 | T | G | 0.400891 | Morning/evening person (chronotype) || id:ukb-b-4956 | TRUE | reported | igd | 0.000113256 | 46.81871694 |
| 413343 | 0.00204003 | -0.0129151 | 46170982 | 12 | 2.40E-10 | ukb-b-4956 | rs11183201 | C | T | 0.508456 | Morning/evening person (chronotype) || id:ukb-b-4956 | TRUE | reported | igd | 9.70E-05 | 40.0793193 |
| 413343 | 0.0029315 | 0.0182454 | 63514274 | 12 | 4.80E-10 | ukb-b-4956 | rs74097630 | T | G | 0.140832 | Morning/evening person (chronotype) || id:ukb-b-4956 | TRUE | reported | igd | 9.37E-05 | 38.73690152 |
| 413343 | 0.00206412 | -0.0140795 | 90452978 | 12 | 9.00E-12 | ukb-b-4956 | rs7959983 | C | T | 0.405084 | Morning/evening person (chronotype) || id:ukb-b-4956 | TRUE | reported | igd | 0.00011255 | 46.5267245 |
| 413343 | 0.0056289 | 0.0525677 | 77568732 | 13 | 9.70E-21 | ukb-b-4956 | rs9573971 | G | A | 0.03387 | Morning/evening person (chronotype) || id:ukb-b-4956 | TRUE | reported | igd | 0.000210954 | 87.2145177 |
| 413343 | 0.0023956 | -0.0144671 | 94065186 | 13 | 1.60E-09 | ukb-b-4956 | rs2762088 | G | T | 0.761336 | Morning/evening person (chronotype) || id:ukb-b-4956 | TRUE | reported | igd | 8.82E-05 | 36.46970553 |
| 413343 | 0.00204935 | 0.0116417 | 109790422 | 13 | 1.30E-08 | ukb-b-4956 | rs17517 | A | G | 0.511747 | Morning/evening person (chronotype) || id:ukb-b-4956 | TRUE | reported | igd | 7.81E-05 | 32.26996048 |
| 413343 | 0.00260302 | 0.0160838 | 56303709 | 13 | 6.50E-10 | ukb-b-4956 | rs9597250 | A | C | 0.189491 | Morning/evening person (chronotype) || id:ukb-b-4956 | TRUE | reported | igd | 9.24E-05 | 38.17861916 |
| 413343 | 0.002412 | -0.0139841 | 85822395 | 13 | 6.70E-09 | ukb-b-4956 | rs1927719 | A | T | 0.765682 | Morning/evening person (chronotype) || id:ukb-b-4956 | TRUE | reported | igd | 8.13E-05 | 33.61339148 |
| 413343 | 0.00210587 | -0.0120801 | 101021218 | 14 | 9.70E-09 | ukb-b-4956 | rs12432176 | A | C | 0.379609 | Morning/evening person (chronotype) || id:ukb-b-4956 | TRUE | reported | igd | 7.96E-05 | 32.90605672 |
| 413343 | 0.00208314 | 0.0115459 | 84253271 | 14 | 3.00E-08 | ukb-b-4956 | rs10149448 | G | A | 0.396431 | Morning/evening person (chronotype) || id:ukb-b-4956 | TRUE | reported | igd | 7.43E-05 | 30.71967138 |
| 413343 | 0.00216074 | -0.0131346 | 57269825 | 14 | 1.20E-09 | ukb-b-4956 | rs698015 | T | C | 0.646935 | Morning/evening person (chronotype) || id:ukb-b-4956 | TRUE | reported | igd | 8.94E-05 | 36.95103248 |
| 413343 | 0.00210712 | 0.0121827 | 74255556 | 14 | 7.40E-09 | ukb-b-4956 | rs7148842 | T | C | 0.386473 | Morning/evening person (chronotype) || id:ukb-b-4956 | TRUE | reported | igd | 8.09E-05 | 33.42769721 |
| 413343 | 0.00214366 | 0.0121652 | 48008970 | 15 | 1.40E-08 | ukb-b-4956 | rs1439319 | C | G | 0.645445 | Morning/evening person (chronotype) || id:ukb-b-4956 | TRUE | reported | igd | 7.79E-05 | 32.2050959 |
| 413343 | 0.0020789 | 0.0114927 | 37383688 | 15 | 3.20E-08 | ukb-b-4956 | rs2701524 | C | T | 0.413565 | Morning/evening person (chronotype) || id:ukb-b-4956 | TRUE | reported | igd | 7.39E-05 | 30.56151227 |
| 413343 | 0.00216342 | 0.0119315 | 78166330 | 15 | 3.50E-08 | ukb-b-4956 | rs4886947 | A | G | 0.660074 | Morning/evening person (chronotype) || id:ukb-b-4956 | TRUE | reported | igd | 7.36E-05 | 30.41629483 |
| 413343 | 0.00218439 | 0.0163395 | 56364030 | 16 | 7.40E-14 | ukb-b-4956 | rs4784655 | C | G | 0.321967 | Morning/evening person (chronotype) || id:ukb-b-4956 | TRUE | reported | igd | 0.000135347 | 55.95192909 |
| 413343 | 0.00227398 | 0.0209482 | 52684916 | 16 | 3.20E-20 | ukb-b-4956 | rs12927162 | G | A | 0.276664 | Morning/evening person (chronotype) || id:ukb-b-4956 | TRUE | reported | igd | 0.000205268 | 84.86293356 |
| 413343 | 0.00207358 | -0.0208469 | 53800954 | 16 | 8.90E-24 | ukb-b-4956 | rs1421085 | C | T | 0.403565 | Morning/evening person (chronotype) || id:ukb-b-4956 | TRUE | reported | igd | 0.000244469 | 101.0739583 |
| 413343 | 0.00205454 | 0.0126513 | 24512509 | 16 | 7.40E-10 | ukb-b-4956 | rs9932577 | A | C | 0.505674 | Morning/evening person (chronotype) || id:ukb-b-4956 | TRUE | reported | igd | 9.17E-05 | 37.91743973 |
| 413343 | 0.00265632 | 0.0219477 | 72210865 | 16 | 1.40E-16 | ukb-b-4956 | rs17604349 | A | G | 0.179748 | Morning/evening person (chronotype) || id:ukb-b-4956 | TRUE | reported | igd | 0.000165133 | 68.26768011 |
| 413343 | 0.00238368 | 0.0189059 | 17401736 | 17 | 2.20E-15 | ukb-b-4956 | rs3760185 | T | C | 0.247661 | Morning/evening person (chronotype) || id:ukb-b-4956 | TRUE | reported | igd | 0.000152168 | 62.90667146 |
| 413343 | 0.00271222 | 0.0151765 | 33923946 | 17 | 2.20E-08 | ukb-b-4956 | rs225298 | G | T | 0.830934 | Morning/evening person (chronotype) || id:ukb-b-4956 | TRUE | reported | igd | 7.57E-05 | 31.31059516 |
| 413343 | 0.00205007 | -0.0124697 | 50208366 | 17 | 1.20E-09 | ukb-b-4956 | rs6504758 | G | A | 0.535685 | Morning/evening person (chronotype) || id:ukb-b-4956 | TRUE | reported | igd | 8.95E-05 | 36.99751273 |
| 413343 | 0.00204355 | -0.0128022 | 65475332 | 17 | 3.70E-10 | ukb-b-4956 | rs2364972 | G | A | 0.462953 | Morning/evening person (chronotype) || id:ukb-b-4956 | TRUE | reported | igd | 9.49E-05 | 39.24610645 |
| 413343 | 0.00524217 | 0.0295339 | 54173733 | 17 | 1.80E-08 | ukb-b-4956 | rs72829706 | G | A | 0.039463 | Morning/evening person (chronotype) || id:ukb-b-4956 | TRUE | reported | igd | 7.68E-05 | 31.74075825 |
| 413343 | 0.0036278 | 0.0307024 | 8057367 | 17 | 2.60E-17 | ukb-b-4956 | rs2518022 | C | T | 0.914438 | Morning/evening person (chronotype) || id:ukb-b-4956 | TRUE | reported | igd | 0.00017325 | 71.62355558 |
| 413343 | 0.00215922 | 0.015874 | 31675680 | 18 | 2.00E-13 | ukb-b-4956 | rs12965577 | G | A | 0.334996 | Morning/evening person (chronotype) || id:ukb-b-4956 | TRUE | reported | igd | 0.000130741 | 54.04765579 |
| 413343 | 0.00204453 | -0.0164219 | 38152835 | 18 | 9.60E-16 | ukb-b-4956 | rs12969848 | T | C | 0.529314 | Morning/evening person (chronotype) || id:ukb-b-4956 | TRUE | reported | igd | 0.000156056 | 64.51455858 |
| 413343 | 0.00258841 | -0.0200454 | 5186019 | 18 | 9.60E-15 | ukb-b-4956 | rs62082401 | G | C | 0.191147 | Morning/evening person (chronotype) || id:ukb-b-4956 | TRUE | reported | igd | 0.000145074 | 59.9737513 |
| 413343 | 0.00206328 | -0.0139169 | 53574043 | 18 | 1.50E-11 | ukb-b-4956 | rs9962650 | G | C | 0.422583 | Morning/evening person (chronotype) || id:ukb-b-4956 | TRUE | reported | igd | 0.000110055 | 45.49530438 |
| 413343 | 0.0022239 | 0.0214879 | 56824041 | 18 | 4.40E-22 | ukb-b-4956 | rs9964420 | A | C | 0.302896 | Morning/evening person (chronotype) || id:ukb-b-4956 | TRUE | reported | igd | 0.000225813 | 93.35881646 |
| 413343 | 0.00203837 | -0.0117206 | 60238668 | 18 | 8.90E-09 | ukb-b-4956 | rs56076457 | T | C | 0.529246 | Morning/evening person (chronotype) || id:ukb-b-4956 | TRUE | reported | igd | 8.00E-05 | 33.06218488 |
| 413343 | 0.00206266 | -0.0134032 | 22624708 | 18 | 8.10E-11 | ukb-b-4956 | rs10460095 | A | G | 0.574433 | Morning/evening person (chronotype) || id:ukb-b-4956 | TRUE | reported | igd | 0.000102143 | 42.22402223 |
| 413343 | 0.00254031 | -0.0151712 | 2695661 | 19 | 2.30E-09 | ukb-b-4956 | rs10402849 | T | C | 0.201704 | Morning/evening person (chronotype) || id:ukb-b-4956 | TRUE | reported | igd | 8.63E-05 | 35.66681509 |
| 413343 | 0.0020508 | 0.012664 | 18441704 | 19 | 6.60E-10 | ukb-b-4956 | rs12971913 | A | G | 0.448148 | Morning/evening person (chronotype) || id:ukb-b-4956 | TRUE | reported | igd | 9.22E-05 | 38.13230735 |
| 413343 | 0.0020669 | 0.0131658 | 49171306 | 19 | 1.90E-10 | ukb-b-4956 | rs12462111 | T | C | 0.464858 | Morning/evening person (chronotype) || id:ukb-b-4956 | TRUE | reported | igd | 9.82E-05 | 40.57452788 |
| 413343 | 0.00218337 | 0.0123004 | 31699729 | 19 | 1.80E-08 | ukb-b-4956 | rs1874493 | G | A | 0.680061 | Morning/evening person (chronotype) || id:ukb-b-4956 | TRUE | reported | igd | 7.68E-05 | 31.738156 |
| 413343 | 0.00205775 | -0.0114876 | 16239683 | 20 | 2.40E-08 | ukb-b-4956 | rs78095690 | C | T | 0.437331 | Morning/evening person (chronotype) || id:ukb-b-4956 | TRUE | reported | igd | 7.54E-05 | 31.16529828 |
| 413343 | 0.00205334 | 0.0116552 | 43538733 | 20 | 1.40E-08 | ukb-b-4956 | rs2072727 | C | T | 0.564423 | Morning/evening person (chronotype) || id:ukb-b-4956 | TRUE | reported | igd | 7.79E-05 | 32.21926465 |
| 413343 | 0.00206747 | -0.0143086 | 17348608 | 20 | 4.50E-12 | ukb-b-4956 | rs6131942 | G | A | 0.579505 | Morning/evening person (chronotype) || id:ukb-b-4956 | TRUE | reported | igd | 0.000115866 | 47.89759989 |
| 413343 | 0.00217877 | 0.0126409 | 45736434 | 22 | 6.60E-09 | ukb-b-4956 | rs1056322 | G | C | 0.321001 | Morning/evening person (chronotype) || id:ukb-b-4956 | TRUE | reported | igd | 8.14E-05 | 33.66131799 |
| 413343 | 0.00206661 | 0.0175504 | 40704052 | 22 | 2.00E-17 | ukb-b-4956 | rs139911 | T | C | 0.575785 | Morning/evening person (chronotype) || id:ukb-b-4956 | TRUE | reported | igd | 0.00017445 | 72.11986146 |
| Getting up in morning | 461658 | 0.00208425 | -0.011657 | 110084408 | 1 | 2.20E-08 | ukb-b-2772 | rs12044778 | A | G | 0.180076 | Getting up in morning || id:ukb-b-2772 | TRUE | reported | igd | 6.78E-05 | 31.2803851 |
| 461658 | 0.00216558 | 0.0196877 | 77740836 | 1 | 9.80E-20 | ukb-b-2772 | rs10518446 | C | G | 0.162759 | Getting up in morning || id:ukb-b-2772 | TRUE | reported | igd | 0.000178996 | 82.64938394 |
| 461658 | 0.00179234 | 0.0103943 | 15986547 | 1 | 6.70E-09 | ukb-b-2772 | rs3766163 | C | T | 0.272949 | Getting up in morning || id:ukb-b-2772 | TRUE | reported | igd | 7.28E-05 | 33.63162244 |
| 461658 | 0.00166155 | 0.0095243 | 8693537 | 1 | 9.90E-09 | ukb-b-2772 | rs10779704 | C | A | 0.624521 | Getting up in morning || id:ukb-b-2772 | TRUE | reported | igd | 7.12E-05 | 32.85771982 |
| 461658 | 0.00161486 | 0.0116401 | 21535330 | 1 | 5.70E-13 | ukb-b-2772 | rs12752290 | C | T | 0.442454 | Getting up in morning || id:ukb-b-2772 | TRUE | reported | igd | 0.000112532 | 51.95672722 |
| 461658 | 0.00452675 | 0.0347714 | 174531909 | 1 | 1.60E-14 | ukb-b-2772 | rs141391319 | A | G | 0.031987 | Getting up in morning || id:ukb-b-2772 | TRUE | reported | igd | 0.00012779 | 59.00236937 |
| 461658 | 0.00200975 | 0.0165379 | 7880683 | 1 | 1.90E-16 | ukb-b-2772 | rs10462020 | G | T | 0.195744 | Getting up in morning || id:ukb-b-2772 | TRUE | reported | igd | 0.000146654 | 67.71342276 |
| 461658 | 0.00469226 | 0.0525952 | 182549729 | 1 | 3.70E-29 | ukb-b-2772 | rs12736689 | C | T | 0.030093 | Getting up in morning || id:ukb-b-2772 | TRUE | reported | igd | 0.000272076 | 125.6395011 |
| 461658 | 0.00201572 | 0.0115293 | 180776143 | 2 | 1.10E-08 | ukb-b-2772 | rs17777135 | A | G | 0.199867 | Getting up in morning || id:ukb-b-2772 | TRUE | reported | igd | 7.09E-05 | 32.7147487 |
| 461658 | 0.00159864 | -0.0107449 | 4650085 | 2 | 1.80E-11 | ukb-b-2772 | rs147325583 | T | C | 0.516407 | Getting up in morning || id:ukb-b-2772 | TRUE | reported | igd | 9.78E-05 | 45.17534977 |
| 461658 | 0.00164876 | 0.0111325 | 76307345 | 2 | 1.50E-11 | ukb-b-2772 | rs406952 | C | T | 0.376409 | Getting up in morning || id:ukb-b-2772 | TRUE | reported | igd | 9.87E-05 | 45.58990014 |
| 461658 | 0.0016125 | -0.0128159 | 77196834 | 2 | 1.90E-15 | ukb-b-2772 | rs1470503 | T | C | 0.4276 | Getting up in morning || id:ukb-b-2772 | TRUE | reported | igd | 0.00013681 | 63.16796587 |
| 461658 | 0.0022034 | -0.0183869 | 239423098 | 2 | 7.10E-17 | ukb-b-2772 | rs4483990 | C | A | 0.157001 | Getting up in morning || id:ukb-b-2772 | TRUE | reported | igd | 0.000150815 | 69.63514056 |
| 461658 | 0.0020143 | 0.0142946 | 44715599 | 2 | 1.30E-12 | ukb-b-2772 | rs1223149 | C | T | 0.803843 | Getting up in morning || id:ukb-b-2772 | TRUE | reported | igd | 0.000109076 | 50.36093997 |
| 461658 | 0.00178363 | -0.012839 | 58896536 | 2 | 6.10E-13 | ukb-b-2772 | rs6745423 | A | T | 0.721988 | Getting up in morning || id:ukb-b-2772 | TRUE | reported | igd | 0.000112223 | 51.81446036 |
| 461658 | 0.00176337 | 0.0114168 | 88933316 | 2 | 9.50E-11 | ukb-b-2772 | rs1606803 | T | C | 0.287134 | Getting up in morning || id:ukb-b-2772 | TRUE | reported | igd | 9.08E-05 | 41.91794746 |
| 461658 | 0.00345721 | 0.01923 | 49960360 | 2 | 2.70E-08 | ukb-b-2772 | rs114443104 | A | G | 0.058491 | Getting up in morning || id:ukb-b-2772 | TRUE | reported | igd | 6.70E-05 | 30.93892117 |
| 461658 | 0.00208479 | 0.0122931 | 59429807 | 2 | 3.70E-09 | ukb-b-2772 | rs10175975 | T | C | 0.18154 | Getting up in morning || id:ukb-b-2772 | TRUE | reported | igd | 7.53E-05 | 34.76932961 |
| 461658 | 0.00252122 | -0.0169965 | 50260468 | 3 | 1.60E-11 | ukb-b-2772 | rs145831787 | T | C | 0.11301 | Getting up in morning || id:ukb-b-2772 | TRUE | reported | igd | 9.84E-05 | 45.44599628 |
| 461658 | 0.00162761 | -0.00957982 | 10727697 | 4 | 4.00E-09 | ukb-b-2772 | rs13116306 | T | C | 0.421435 | Getting up in morning || id:ukb-b-2772 | TRUE | reported | igd | 7.50E-05 | 34.64273068 |
| 461658 | 0.0035079 | 0.0204309 | 123186393 | 4 | 5.70E-09 | ukb-b-2772 | rs45510091 | G | A | 0.054615 | Getting up in morning || id:ukb-b-2772 | TRUE | reported | igd | 7.35E-05 | 33.92178569 |
| 461658 | 0.00176188 | 0.0145939 | 151942880 | 5 | 1.20E-16 | ukb-b-2772 | rs4958317 | A | G | 0.289184 | Getting up in morning || id:ukb-b-2772 | TRUE | reported | igd | 0.000148595 | 68.61012322 |
| 461658 | 0.00188507 | -0.0121208 | 88167641 | 5 | 1.30E-10 | ukb-b-2772 | rs13155750 | G | A | 0.233844 | Getting up in morning || id:ukb-b-2772 | TRUE | reported | igd | 8.95E-05 | 41.34335581 |
| 461658 | 0.0017711 | -0.0110033 | 147986024 | 6 | 5.20E-10 | ukb-b-2772 | rs9399613 | T | C | 0.289087 | Getting up in morning || id:ukb-b-2772 | TRUE | reported | igd | 8.36E-05 | 38.59738308 |
| 461658 | 0.00178212 | -0.0099208 | 72482458 | 6 | 2.60E-08 | ukb-b-2772 | rs10455248 | T | C | 0.282109 | Getting up in morning || id:ukb-b-2772 | TRUE | reported | igd | 6.71E-05 | 30.98971764 |
| 461658 | 0.00209564 | -0.0236437 | 55154146 | 6 | 1.60E-29 | ukb-b-2772 | rs2653355 | A | C | 0.823231 | Getting up in morning || id:ukb-b-2772 | TRUE | reported | igd | 0.00027565 | 127.2903968 |
| 461658 | 0.00250964 | 0.0144542 | 57094282 | 6 | 8.40E-09 | ukb-b-2772 | rs12523700 | A | T | 0.117842 | Getting up in morning || id:ukb-b-2772 | TRUE | reported | igd | 7.18E-05 | 33.171368 |
| 461658 | 0.00189208 | 0.0110153 | 80049690 | 6 | 5.80E-09 | ukb-b-2772 | rs72895663 | G | A | 0.23113 | Getting up in morning || id:ukb-b-2772 | TRUE | reported | igd | 7.34E-05 | 33.8931386 |
| 461658 | 0.00191416 | 0.0110675 | 153120813 | 6 | 7.40E-09 | ukb-b-2772 | rs620598 | G | A | 0.225728 | Getting up in morning || id:ukb-b-2772 | TRUE | reported | igd | 7.24E-05 | 33.43033331 |
| 461658 | 0.0016104 | 0.0103906 | 71838994 | 7 | 1.10E-10 | ukb-b-2772 | rs1914397 | A | T | 0.448253 | Getting up in morning || id:ukb-b-2772 | TRUE | reported | igd | 9.02E-05 | 41.63052115 |
| 461658 | 0.00202865 | 0.0124877 | 102433678 | 7 | 7.50E-10 | ukb-b-2772 | rs112613078 | G | A | 0.191237 | Getting up in morning || id:ukb-b-2772 | TRUE | reported | igd | 8.21E-05 | 37.89210932 |
| 461658 | 0.00193586 | -0.0107092 | 133643778 | 7 | 3.20E-08 | ukb-b-2772 | rs2971970 | G | T | 0.782088 | Getting up in morning || id:ukb-b-2772 | TRUE | reported | igd | 6.63E-05 | 30.6030199 |
| 461658 | 0.00191103 | 0.0113061 | 32016694 | 8 | 3.30E-09 | ukb-b-2772 | rs7833021 | T | C | 0.772533 | Getting up in morning || id:ukb-b-2772 | TRUE | reported | igd | 7.58E-05 | 35.00166901 |
| 461658 | 0.00199543 | 0.0109469 | 116659731 | 8 | 4.10E-08 | ukb-b-2772 | rs17716502 | T | C | 0.204344 | Getting up in morning || id:ukb-b-2772 | TRUE | reported | igd | 6.52E-05 | 30.09590627 |
| 461658 | 0.00191626 | 0.012836 | 53132694 | 8 | 2.10E-11 | ukb-b-2772 | rs2360802 | T | A | 0.225184 | Getting up in morning || id:ukb-b-2772 | TRUE | reported | igd | 9.72E-05 | 44.86923519 |
| 461658 | 0.00195424 | 0.0115942 | 135611476 | 8 | 3.00E-09 | ukb-b-2772 | rs9644465 | A | G | 0.212173 | Getting up in morning || id:ukb-b-2772 | TRUE | reported | igd | 7.62E-05 | 35.19847901 |
| 461658 | 0.00236126 | -0.0134326 | 76595289 | 8 | 1.30E-08 | ukb-b-2772 | rs2044742 | A | G | 0.131812 | Getting up in morning || id:ukb-b-2772 | TRUE | reported | igd | 7.01E-05 | 32.36165048 |
| 461658 | 0.00165786 | 0.0100968 | 4837733 | 8 | 1.10E-09 | ukb-b-2772 | rs73179222 | A | G | 0.37177 | Getting up in morning || id:ukb-b-2772 | TRUE | reported | igd | 8.03E-05 | 37.09111762 |
| 461658 | 0.00243328 | -0.0185204 | 140265782 | 9 | 2.70E-14 | ukb-b-2772 | rs77641763 | T | C | 0.122477 | Getting up in morning || id:ukb-b-2772 | TRUE | reported | igd | 0.000125471 | 57.93148617 |
| 461658 | 0.00181939 | -0.0104995 | 73771616 | 9 | 7.90E-09 | ukb-b-2772 | rs1854558 | A | G | 0.262243 | Getting up in morning || id:ukb-b-2772 | TRUE | reported | igd | 7.21E-05 | 33.30302993 |
| 461658 | 0.00240256 | 0.0136082 | 126684263 | 10 | 1.50E-08 | ukb-b-2772 | rs7899208 | C | T | 0.873766 | Getting up in morning || id:ukb-b-2772 | TRUE | reported | igd | 6.95E-05 | 32.08122927 |
| 461658 | 0.00236786 | -0.0134609 | 122843785 | 11 | 1.30E-08 | ukb-b-2772 | rs73608603 | G | A | 0.131243 | Getting up in morning || id:ukb-b-2772 | TRUE | reported | igd | 7.00E-05 | 32.31724065 |
| 461658 | 0.00163468 | 0.0089503 | 80209300 | 11 | 4.40E-08 | ukb-b-2772 | rs7105482 | G | A | 0.394887 | Getting up in morning || id:ukb-b-2772 | TRUE | reported | igd | 6.49E-05 | 29.97835548 |
| 461658 | 0.00174884 | -0.0118163 | 57880725 | 11 | 1.40E-11 | ukb-b-2772 | rs17152364 | G | A | 0.300997 | Getting up in morning || id:ukb-b-2772 | TRUE | reported | igd | 9.89E-05 | 45.6521231 |
| 461658 | 0.00162234 | -0.00955431 | 38289817 | 12 | 3.90E-09 | ukb-b-2772 | rs11181153 | T | C | 0.586836 | Getting up in morning || id:ukb-b-2772 | TRUE | reported | igd | 7.51E-05 | 34.68270986 |
| 461658 | 0.00167464 | 0.0125433 | 39247777 | 12 | 6.90E-14 | ukb-b-2772 | rs17464772 | A | G | 0.352041 | Getting up in morning || id:ukb-b-2772 | TRUE | reported | igd | 0.000121509 | 56.10206107 |
| 461658 | 0.00185018 | 0.0118489 | 57679030 | 12 | 1.50E-10 | ukb-b-2772 | rs12227309 | T | C | 0.246638 | Getting up in morning || id:ukb-b-2772 | TRUE | reported | igd | 8.88E-05 | 41.01344243 |
| 461658 | 0.00338623 | -0.0194724 | 90043098 | 12 | 8.90E-09 | ukb-b-2772 | rs61926781 | T | C | 0.059112 | Getting up in morning || id:ukb-b-2772 | TRUE | reported | igd | 7.16E-05 | 33.06771432 |
| 461658 | 0.00167444 | 0.0104984 | 107435405 | 12 | 3.60E-10 | ukb-b-2772 | rs1017168 | C | A | 0.64442 | Getting up in morning || id:ukb-b-2772 | TRUE | reported | igd | 8.51E-05 | 39.31019244 |
| 461658 | 0.00164775 | -0.00921206 | 59234297 | 13 | 2.30E-08 | ukb-b-2772 | rs1333536 | T | C | 0.384778 | Getting up in morning || id:ukb-b-2772 | TRUE | reported | igd | 6.77E-05 | 31.25568302 |
| 461658 | 0.00199962 | -0.0120184 | 55722912 | 13 | 1.90E-09 | ukb-b-2772 | rs3125735 | T | C | 0.199178 | Getting up in morning || id:ukb-b-2772 | TRUE | reported | igd | 7.82E-05 | 36.12405404 |
| 461658 | 0.00362074 | -0.0206352 | 77591227 | 13 | 1.20E-08 | ukb-b-2772 | rs9573982 | C | T | 0.05141 | Getting up in morning || id:ukb-b-2772 | TRUE | reported | igd | 7.04E-05 | 32.48035773 |
| 461658 | 0.00159722 | -0.00903684 | 89349339 | 14 | 1.50E-08 | ukb-b-2772 | rs7144028 | C | A | 0.499138 | Getting up in morning || id:ukb-b-2772 | TRUE | reported | igd | 6.93E-05 | 32.01119045 |
| 461658 | 0.00194498 | -0.0117773 | 98587635 | 14 | 1.40E-09 | ukb-b-2772 | rs77556698 | T | G | 0.21591 | Getting up in morning || id:ukb-b-2772 | TRUE | reported | igd | 7.94E-05 | 36.66564375 |
| 461658 | 0.00174461 | 0.0101831 | 42174515 | 14 | 5.30E-09 | ukb-b-2772 | rs17112198 | G | A | 0.298533 | Getting up in morning || id:ukb-b-2772 | TRUE | reported | igd | 7.38E-05 | 34.06915961 |
| 461658 | 0.00192296 | 0.0108337 | 78784195 | 14 | 1.80E-08 | ukb-b-2772 | rs34757401 | G | A | 0.226798 | Getting up in morning || id:ukb-b-2772 | TRUE | reported | igd | 6.87E-05 | 31.74031467 |
| 461658 | 0.00166437 | -0.00946774 | 64715773 | 14 | 1.30E-08 | ukb-b-2772 | rs17766755 | A | G | 0.360087 | Getting up in morning || id:ukb-b-2772 | TRUE | reported | igd | 7.01E-05 | 32.35869558 |
| 461658 | 0.00162498 | -0.011935 | 78080737 | 15 | 2.10E-13 | ukb-b-2772 | rs11629621 | G | C | 0.577452 | Getting up in morning || id:ukb-b-2772 | TRUE | reported | igd | 0.000116836 | 53.94446931 |
| 461658 | 0.0017983 | 0.0121786 | 49149191 | 16 | 1.30E-11 | ukb-b-2772 | rs1420607 | A | G | 0.272429 | Getting up in morning || id:ukb-b-2772 | TRUE | reported | igd | 9.93E-05 | 45.86364456 |
| 461658 | 0.0016269 | 0.0109591 | 53800954 | 16 | 1.60E-11 | ukb-b-2772 | rs1421085 | C | T | 0.40345 | Getting up in morning || id:ukb-b-2772 | TRUE | reported | igd | 9.83E-05 | 45.37599694 |
| 461658 | 0.00163897 | -0.00974046 | 60603261 | 16 | 2.80E-09 | ukb-b-2772 | rs7206027 | T | A | 0.385657 | Getting up in morning || id:ukb-b-2772 | TRUE | reported | igd | 7.65E-05 | 35.31954047 |
| 461658 | 0.00159828 | -0.00994218 | 72214613 | 16 | 5.00E-10 | ukb-b-2772 | rs11075924 | A | C | 0.495783 | Getting up in morning || id:ukb-b-2772 | TRUE | reported | igd | 8.38E-05 | 38.69506958 |
| 461658 | 0.0019463 | 0.0129321 | 44018519 | 17 | 3.00E-11 | ukb-b-2772 | rs7210219 | C | T | 0.224138 | Getting up in morning || id:ukb-b-2772 | TRUE | reported | igd | 9.56E-05 | 44.1485721 |
| 461658 | 0.00291327 | 0.0178551 | 2578550 | 17 | 8.80E-10 | ukb-b-2772 | rs4790352 | A | G | 0.917939 | Getting up in morning || id:ukb-b-2772 | TRUE | reported | igd | 8.14E-05 | 37.56308206 |
| 461658 | 0.00211178 | 0.0162404 | 46463909 | 17 | 1.50E-14 | ukb-b-2772 | rs77556405 | A | G | 0.172495 | Getting up in morning || id:ukb-b-2772 | TRUE | reported | igd | 0.000128091 | 59.14175624 |
| 461658 | 0.00187134 | -0.012079 | 17401736 | 17 | 1.10E-10 | ukb-b-2772 | rs3760185 | T | C | 0.247523 | Getting up in morning || id:ukb-b-2772 | TRUE | reported | igd | 9.02E-05 | 41.66339725 |
| 461658 | 0.00170497 | -0.0110555 | 50296459 | 17 | 8.90E-11 | ukb-b-2772 | rs12601968 | T | G | 0.32673 | Getting up in morning || id:ukb-b-2772 | TRUE | reported | igd | 9.11E-05 | 42.04568312 |
| 461658 | 0.00174935 | 0.0104007 | 53186092 | 18 | 2.80E-09 | ukb-b-2772 | rs627685 | C | T | 0.303582 | Getting up in morning || id:ukb-b-2772 | TRUE | reported | igd | 7.66E-05 | 35.34840638 |
| 461658 | 0.00217634 | 0.0119267 | 5196554 | 18 | 4.20E-08 | ukb-b-2772 | rs12326675 | G | C | 0.193346 | Getting up in morning || id:ukb-b-2772 | TRUE | reported | igd | 6.50E-05 | 30.03206676 |
| 461658 | 0.00160486 | 0.00952836 | 38152835 | 18 | 2.90E-09 | ukb-b-2772 | rs12969848 | T | C | 0.529476 | Getting up in morning || id:ukb-b-2772 | TRUE | reported | igd | 7.63E-05 | 35.25008168 |
| 461658 | 0.002488 | -0.0139036 | 42654905 | 19 | 2.30E-08 | ukb-b-2772 | rs113232113 | T | A | 0.116606 | Getting up in morning || id:ukb-b-2772 | TRUE | reported | igd | 6.76E-05 | 31.22855551 |
| 461658 | 0.0016161 | -0.00937007 | 9942810 | 19 | 6.70E-09 | ukb-b-2772 | rs11672103 | T | C | 0.553457 | Getting up in morning || id:ukb-b-2772 | TRUE | reported | igd | 7.28E-05 | 33.61610013 |
| 461658 | 0.00194612 | 0.0106355 | 31935181 | 19 | 4.60E-08 | ukb-b-2772 | rs11669535 | C | T | 0.21707 | Getting up in morning || id:ukb-b-2772 | TRUE | reported | igd | 6.47E-05 | 29.86583839 |
| 461658 | 0.00285841 | -0.0171376 | 51332268 | 20 | 2.00E-09 | ukb-b-2772 | rs74555583 | A | G | 0.085288 | Getting up in morning || id:ukb-b-2772 | TRUE | reported | igd | 7.79E-05 | 35.94587646 |
| 461658 | 0.00166947 | -0.00997727 | 31037635 | 20 | 2.30E-09 | ukb-b-2772 | rs6141724 | G | T | 0.370474 | Getting up in morning || id:ukb-b-2772 | TRUE | reported | igd | 7.74E-05 | 35.71612465 |
| 461658 | 0.00197572 | 0.0111745 | 41074168 | 22 | 1.50E-08 | ukb-b-2772 | rs133067 | T | C | 0.790791 | Getting up in morning || id:ukb-b-2772 | TRUE | reported | igd | 6.93E-05 | 31.9892108 |
| 461658 | 0.00179241 | -0.0102526 | 50628746 | 22 | 1.10E-08 | ukb-b-2772 | rs735119 | G | T | 0.727553 | Getting up in morning || id:ukb-b-2772 | TRUE | reported | igd | 7.09E-05 | 32.71835272 |
| narcolepsy | 336082 | 0.00160829 | -0.0092942 | 33306684 | 1 | 7.52E-09 | ukb-a-15 | rs811483 | T | C | 0.167591 | Daytime dozing / sleeping (narcolepsy) || id:ukb-a-15 | TRUE | reported | igd | 9.94E-05 | 33.39586677 |
| 336082 | 0.00208364 | -0.0173084 | 62579891 | 1 | 9.87E-17 | ukb-a-15 | rs12140153 | T | G | 0.0967607 | Daytime dozing / sleeping (narcolepsy) || id:ukb-a-15 | TRUE | reported | igd | 0.000205274 | 69.00266908 |
| 336082 | 0.00125589 | -0.00740627 | 90967306 | 1 | 3.70E-09 | ukb-a-15 | rs553314 | C | T | 0.633536 | Daytime dozing / sleeping (narcolepsy) || id:ukb-a-15 | TRUE | reported | igd | 0.000103468 | 34.7770942 |
| 336082 | 0.00123565 | -0.00801892 | 27742603 | 2 | 8.62E-11 | ukb-a-15 | rs780093 | C | T | 0.618676 | Daytime dozing / sleeping (narcolepsy) || id:ukb-a-15 | TRUE | reported | igd | 0.000125297 | 42.1151382 |
| 336082 | 0.00122679 | -0.0080953 | 104325425 | 2 | 4.15E-11 | ukb-a-15 | rs13023284 | C | T | 0.603922 | Daytime dozing / sleeping (narcolepsy) || id:ukb-a-15 | TRUE | reported | igd | 0.000129546 | 43.54345208 |
| 336082 | 0.00122662 | -0.0089982 | 236792801 | 2 | 2.21E-13 | ukb-a-15 | rs13010456 | G | A | 0.406041 | Daytime dozing / sleeping (narcolepsy) || id:ukb-a-15 | TRUE | reported | igd | 0.000160095 | 53.81317497 |
| 336082 | 0.00143111 | -0.00812548 | 183996213 | 3 | 1.37E-08 | ukb-a-15 | rs843372 | T | C | 0.769689 | Daytime dozing / sleeping (narcolepsy) || id:ukb-a-15 | TRUE | reported | igd | 9.59E-05 | 32.23661512 |
| 336082 | 0.00121686 | -0.00729813 | 92519387 | 5 | 2.01E-09 | ukb-a-15 | rs4242242 | A | G | 0.41895 | Daytime dozing / sleeping (narcolepsy) || id:ukb-a-15 | TRUE | reported | igd | 0.000107016 | 35.96991196 |
| 336082 | 0.00120158 | -0.00664634 | 138487253 | 5 | 3.18E-08 | ukb-a-15 | rs10900858 | G | A | 0.527116 | Daytime dozing / sleeping (narcolepsy) || id:ukb-a-15 | TRUE | reported | igd | 9.10E-05 | 30.59547091 |
| 336082 | 0.0012379 | 0.00688219 | 124920871 | 6 | 2.71E-08 | ukb-a-15 | rs614987 | C | A | 0.61521 | Daytime dozing / sleeping (narcolepsy) || id:ukb-a-15 | TRUE | reported | igd | 9.20E-05 | 30.90861935 |
| 336082 | 0.00142994 | -0.00907205 | 55058998 | 6 | 2.24E-10 | ukb-a-15 | rs3122170 | A | C | 0.767837 | Daytime dozing / sleeping (narcolepsy) || id:ukb-a-15 | TRUE | reported | igd | 0.000119751 | 40.25062756 |
| 336082 | 0.00128931 | -0.00719636 | 27289776 | 6 | 2.39E-08 | ukb-a-15 | rs6923811 | C | T | 0.321054 | Daytime dozing / sleeping (narcolepsy) || id:ukb-a-15 | TRUE | reported | igd | 9.27E-05 | 31.15361691 |
| 336082 | 0.00126183 | 0.007258 | 132948884 | 7 | 8.83E-09 | ukb-a-15 | rs35284403 | C | T | 0.350137 | Daytime dozing / sleeping (narcolepsy) || id:ukb-a-15 | TRUE | reported | igd | 9.84E-05 | 33.08488628 |
| 336082 | 0.00120813 | -0.00701679 | 106087862 | 8 | 6.33E-09 | ukb-a-15 | rs285793 | A | G | 0.538181 | Daytime dozing / sleeping (narcolepsy) || id:ukb-a-15 | TRUE | reported | igd | 0.00010036 | 33.73238404 |
| 336082 | 0.00148531 | 0.0102683 | 81727018 | 9 | 4.75E-12 | ukb-a-15 | rs13284688 | C | T | 0.206218 | Daytime dozing / sleeping (narcolepsy) || id:ukb-a-15 | TRUE | reported | igd | 0.000142186 | 47.79256096 |
| 336082 | 0.00128661 | -0.00752882 | 92416402 | 10 | 4.87E-09 | ukb-a-15 | rs7476897 | A | G | 0.320659 | Daytime dozing / sleeping (narcolepsy) || id:ukb-a-15 | TRUE | reported | igd | 0.000101876 | 34.24186404 |
| 336082 | 0.00122252 | 0.0107093 | 117938380 | 12 | 1.96E-18 | ukb-a-15 | rs1846644 | C | T | 0.410582 | Daytime dozing / sleeping (narcolepsy) || id:ukb-a-15 | TRUE | reported | igd | 0.000228279 | 76.73749875 |
| 336082 | 0.00142281 | 0.00791198 | 83237899 | 15 | 2.69E-08 | ukb-a-15 | rs17356118 | G | A | 0.232007 | Daytime dozing / sleeping (narcolepsy) || id:ukb-a-15 | TRUE | reported | igd | 9.20E-05 | 30.92245451 |
| 336082 | 0.00147391 | -0.00931582 | 44355602 | 17 | 2.61E-10 | ukb-a-15 | rs2696532 | G | A | 0.223014 | Daytime dozing / sleeping (narcolepsy) || id:ukb-a-15 | TRUE | reported | igd | 0.000118851 | 39.94824105 |
| Snoring | 430438 | 0.00122565 | -0.00689155 | 24022160 | 12 | 1.90E-08 | ukb-b-17400 | rs10505911 | A | C | 0.221067 | Snoring || id:ukb-b-17400 | TRUE | reported | igd | 7.34E-05 | 31.61541346 |
| 430438 | 0.00105364 | -0.00619444 | 92601909 | 11 | 4.10E-09 | ukb-b-17400 | rs10765567 | T | A | 0.373316 | Snoring || id:ukb-b-17400 | TRUE | reported | igd | 8.03E-05 | 34.56348967 |
| 430438 | 0.00103598 | -0.005802 | 33781959 | 12 | 2.10E-08 | ukb-b-17400 | rs10844665 | A | C | 0.413432 | Snoring || id:ukb-b-17400 | TRUE | reported | igd | 7.29E-05 | 31.36538975 |
| 430438 | 0.00105892 | 0.0091493 | 65795603 | 12 | 5.60E-18 | ukb-b-17400 | rs10878271 | C | T | 0.635767 | Snoring || id:ukb-b-17400 | TRUE | reported | igd | 0.000173406 | 74.65302602 |
| 430438 | 0.00107036 | 0.00659353 | 88861590 | 11 | 7.30E-10 | ukb-b-17400 | rs11018488 | T | A | 0.373764 | Snoring || id:ukb-b-17400 | TRUE | reported | igd | 8.82E-05 | 37.94671743 |
| 430438 | 0.00105298 | -0.00665949 | 31054607 | 16 | 2.50E-10 | ukb-b-17400 | rs1108431 | T | C | 0.371682 | Snoring || id:ukb-b-17400 | TRUE | reported | igd | 9.29E-05 | 39.99812926 |
| 430438 | 0.00105657 | -0.00636899 | 50820336 | 1 | 1.70E-09 | ukb-b-17400 | rs11205713 | C | T | 0.434636 | Snoring || id:ukb-b-17400 | TRUE | reported | igd | 8.44E-05 | 36.33645587 |
| 430438 | 0.00113809 | 0.00621477 | 76627333 | 15 | 4.70E-08 | ukb-b-17400 | rs11855999 | C | A | 0.278688 | Snoring || id:ukb-b-17400 | TRUE | reported | igd | 6.93E-05 | 29.81912452 |
| 430438 | 0.00182515 | -0.0118048 | 96878072 | 1 | 9.90E-11 | ukb-b-17400 | rs12119849 | A | G | 0.08639 | Snoring || id:ukb-b-17400 | TRUE | reported | igd | 9.72E-05 | 41.83291457 |
| 430438 | 0.00130319 | -0.00721635 | 70011419 | 17 | 3.10E-08 | ukb-b-17400 | rs12150290 | C | A | 0.19072 | Snoring || id:ukb-b-17400 | TRUE | reported | igd | 7.12E-05 | 30.66321457 |
| 430438 | 0.00102471 | 0.00666554 | 40745860 | 13 | 7.80E-11 | ukb-b-17400 | rs12429765 | G | A | 0.491142 | Snoring || id:ukb-b-17400 | TRUE | reported | igd | 9.83E-05 | 42.31230759 |
| 430438 | 0.00102978 | 0.00608356 | 46248994 | 17 | 3.50E-09 | ukb-b-17400 | rs12603115 | T | C | 0.576378 | Snoring || id:ukb-b-17400 | TRUE | reported | igd | 8.11E-05 | 34.89993899 |
| 430438 | 0.00102961 | 0.00570558 | 122653399 | 5 | 3.00E-08 | ukb-b-17400 | rs13156484 | A | G | 0.472138 | Snoring || id:ukb-b-17400 | TRUE | reported | igd | 7.13E-05 | 30.7080385 |
| 430438 | 0.00104064 | -0.00733607 | 71474355 | 8 | 1.80E-12 | ukb-b-17400 | rs13251292 | G | A | 0.409231 | Snoring || id:ukb-b-17400 | TRUE | reported | igd | 0.000115442 | 49.69628045 |
| 430438 | 0.00102521 | 0.00626374 | 77615539 | 3 | 1.00E-09 | ukb-b-17400 | rs1374895 | T | C | 0.547329 | Snoring || id:ukb-b-17400 | TRUE | reported | igd | 8.67E-05 | 37.32843303 |
| 430438 | 0.00103031 | -0.00684996 | 53803187 | 16 | 3.00E-11 | ukb-b-17400 | rs1558901 | T | A | 0.423472 | Snoring || id:ukb-b-17400 | TRUE | reported | igd | 0.00010268 | 44.20162369 |
| 430438 | 0.00104253 | 0.00607001 | 94009049 | 3 | 5.80E-09 | ukb-b-17400 | rs1609721 | C | T | 0.397365 | Snoring || id:ukb-b-17400 | TRUE | reported | igd | 7.88E-05 | 33.89999802 |
| 430438 | 0.00121706 | -0.00716287 | 100839163 | 6 | 4.00E-09 | ukb-b-17400 | rs17060460 | G | A | 0.225976 | Snoring || id:ukb-b-17400 | TRUE | reported | igd | 8.05E-05 | 34.63762788 |
| 430438 | 0.0010752 | -0.00658396 | 127382155 | 7 | 9.20E-10 | ukb-b-17400 | rs17151229 | C | G | 0.339716 | Snoring || id:ukb-b-17400 | TRUE | reported | igd | 8.71E-05 | 37.4967682 |
| 430438 | 0.00103396 | -0.00709843 | 67930613 | 17 | 6.60E-12 | ukb-b-17400 | rs180110 | A | G | 0.590745 | Snoring || id:ukb-b-17400 | TRUE | reported | igd | 0.000109486 | 47.13191809 |
| 430438 | 0.00130777 | 0.00881535 | 27694241 | 11 | 1.60E-11 | ukb-b-17400 | rs2049045 | C | G | 0.186162 | Snoring || id:ukb-b-17400 | TRUE | reported | igd | 0.00010555 | 45.43749297 |
| 430438 | 0.00102315 | -0.00631525 | 54776955 | 17 | 6.70E-10 | ukb-b-17400 | rs227727 | T | A | 0.456206 | Snoring || id:ukb-b-17400 | TRUE | reported | igd | 8.85E-05 | 38.09784933 |
| 430438 | 0.00104229 | 0.00748041 | 75003678 | 5 | 7.10E-13 | ukb-b-17400 | rs2307111 | C | T | 0.395033 | Snoring || id:ukb-b-17400 | TRUE | reported | igd | 0.00011965 | 51.50763912 |
| 430438 | 0.00108169 | -0.00615143 | 128150784 | 9 | 1.30E-08 | ukb-b-17400 | rs2648315 | T | C | 0.339503 | Snoring || id:ukb-b-17400 | TRUE | reported | igd | 7.51E-05 | 32.34033581 |
| 430438 | 0.00104197 | 0.0074749 | 99750520 | 14 | 7.30E-13 | ukb-b-17400 | rs2664303 | T | C | 0.421027 | Snoring || id:ukb-b-17400 | TRUE | reported | igd | 0.000119547 | 51.46338232 |
| 430438 | 0.00120863 | 0.00772261 | 25408838 | 4 | 1.70E-10 | ukb-b-17400 | rs34811474 | A | G | 0.230887 | Snoring || id:ukb-b-17400 | TRUE | reported | igd | 9.48E-05 | 40.82624603 |
| 430438 | 0.00102431 | -0.00568185 | 28494350 | 16 | 2.90E-08 | ukb-b-17400 | rs34838 | G | A | 0.446056 | Snoring || id:ukb-b-17400 | TRUE | reported | igd | 7.15E-05 | 30.76909235 |
| 430438 | 0.00118992 | -0.0065801 | 42537506 | 4 | 3.20E-08 | ukb-b-17400 | rs4493577 | A | G | 0.241831 | Snoring || id:ukb-b-17400 | TRUE | reported | igd | 7.10E-05 | 30.57929308 |
| 430438 | 0.00113318 | -0.00736751 | 78234143 | 8 | 7.90E-11 | ukb-b-17400 | rs4523230 | T | A | 0.716 | Snoring || id:ukb-b-17400 | TRUE | reported | igd | 9.82E-05 | 42.27091497 |
| 430438 | 0.00104112 | -0.00626651 | 97475396 | 9 | 1.80E-09 | ukb-b-17400 | rs4744369 | A | T | 0.585805 | Snoring || id:ukb-b-17400 | TRUE | reported | igd | 8.42E-05 | 36.22829349 |
| 430438 | 0.00108679 | 0.00689671 | 134452597 | 5 | 2.20E-10 | ukb-b-17400 | rs4976269 | A | G | 0.328075 | Snoring || id:ukb-b-17400 | TRUE | reported | igd | 9.35E-05 | 40.27083589 |
| 430438 | 0.00281582 | -0.0161584 | 60960310 | 18 | 9.60E-09 | ukb-b-17400 | rs4987719 | T | C | 0.033829 | Snoring || id:ukb-b-17400 | TRUE | reported | igd | 7.65E-05 | 32.92948307 |
| 430438 | 0.00118891 | -0.00799688 | 43758898 | 17 | 1.70E-11 | ukb-b-17400 | rs57222984 | G | A | 0.244101 | Snoring || id:ukb-b-17400 | TRUE | reported | igd | 0.000105096 | 45.24193593 |
| 430438 | 0.00102497 | -0.00886843 | 51340315 | 13 | 5.00E-18 | ukb-b-17400 | rs592333 | G | A | 0.443888 | Snoring || id:ukb-b-17400 | TRUE | reported | igd | 0.000173894 | 74.86333302 |
| 430438 | 0.00105284 | -0.0066126 | 6635266 | 20 | 3.40E-10 | ukb-b-17400 | rs6054427 | A | G | 0.620732 | Snoring || id:ukb-b-17400 | TRUE | reported | igd | 9.16E-05 | 39.44734102 |
| 430438 | 0.00117785 | -0.00690463 | 55347828 | 20 | 4.60E-09 | ukb-b-17400 | rs6099273 | T | C | 0.251056 | Snoring || id:ukb-b-17400 | TRUE | reported | igd | 7.98E-05 | 34.36361394 |
| 430438 | 0.00149482 | -0.0117556 | 157013035 | 2 | 3.70E-15 | ukb-b-17400 | rs72902175 | T | C | 0.134226 | Snoring || id:ukb-b-17400 | TRUE | reported | igd | 0.000143661 | 61.84573892 |
| 430438 | 0.00173791 | 0.0109122 | 32171579 | 19 | 3.40E-10 | ukb-b-17400 | rs73030263 | C | T | 0.095265 | Snoring || id:ukb-b-17400 | TRUE | reported | igd | 9.16E-05 | 39.42466867 |
| 430438 | 0.00110966 | -0.00627427 | 29683737 | 14 | 1.60E-08 | ukb-b-17400 | rs743122 | C | T | 0.301438 | Snoring || id:ukb-b-17400 | TRUE | reported | igd | 7.43E-05 | 31.97013918 |
| 430438 | 0.00117983 | -0.00651407 | 147025368 | 3 | 3.40E-08 | ukb-b-17400 | rs75563552 | G | A | 0.25014 | Snoring || id:ukb-b-17400 | TRUE | reported | igd | 7.08E-05 | 30.48343858 |
| 430438 | 0.00112489 | -0.00649558 | 7455707 | 17 | 7.70E-09 | ukb-b-17400 | rs78608249 | T | C | 0.290033 | Snoring || id:ukb-b-17400 | TRUE | reported | igd | 7.75E-05 | 33.34369632 |
| 430438 | 0.00102443 | 0.00674754 | 1985843 | 17 | 4.50E-11 | ukb-b-17400 | rs8069947 | T | C | 0.447092 | Snoring || id:ukb-b-17400 | TRUE | reported | igd | 0.000100779 | 43.38347555 |
| 430438 | 0.00107352 | 0.00607189 | 111559742 | 13 | 1.50E-08 | ukb-b-17400 | rs9521988 | A | G | 0.340255 | Snoring || id:ukb-b-17400 | TRUE | reported | igd | 7.43E-05 | 31.99082887 |
| 430438 | 0.00130278 | 0.00884562 | 9060106 | 10 | 1.10E-11 | ukb-b-17400 | rs957349 | A | T | 0.812446 | Snoring || id:ukb-b-17400 | TRUE | reported | igd | 0.000107092 | 46.10121524 |

**Supplementary Table 2.** MR analysis results of sleep traits on stable angina pectoris or unstable angina pectoris

| exposure | outcome | method | nsnp | outlier | pval | OR | 95%CI | Heterogeneity | | IVW_MRE | | Horizontal Pleiotrophy | | MR-PRESSO |
| --- | --- | --- | --- | --- | --- | --- | --- | --- | --- | --- | --- | --- | --- | --- |
| Q | Q_pval | OR | pval | Egger intercept | Pleiotrophy-pval | pval |
| Nap during day | Stable angina pectoris | MR Egger | 47 | rs2250377 | 0.95265031 | 1.036042 | 0.3240576-3.312319 | 58.55166 | 0.08461194 |  |  | 0.003141842 | 0.6308969 | 0.09433333 |
| Weighted median | 47 | 0.12003562 | 1.393942 | 0.9303177-2.088613 |  |  |  |  |  |  |
| Inverse variance weighted | 47 | 0.04259698 | 1.366509 | 1.0104711-1.847995 | 58.85617 | 0.0966877 |  |  |  |  |
| Simple mode | 47 | 0.48958801 | 1.369597 | 0.5672074-3.307075 |  |  |  |  |  |  |
| Weighted mode | 47 | 0.61953345 | 1.198351 | 0.6329461-2.268827 |  |  |  |  |  |  |
| Nap during day | Unstable angina pectoris | MR Egger | 48 |  | 0.696425407 | 0.697038466 | 0.11501279-4.22442254 | 67.52996 | 0.02096442 |  |  | 0.008305045 | 0.4186137 | 0.021 |
| Weighted median | 48 | 0.366616777 | 1.312887838 | 0.727044269-2.370797142 |  |  |  |  |  |  |
| Inverse variance weighted | 48 | 0.131641641 | 1.437622046 | 0.896813531-2.304556159 | 68.50785 | 0.02192984 | 1.437622058 | 0.1316416 |  |  |
| Simple mode | 48 | 0.466146016 | 1.724536912 | 0.403019024-7.379372644 |  |  |  |  |  |  |
| Weighted mode | 48 | 0.901450092 | 1.079090937 | 0.325557444-3.576748961 |  |  |  |  |  |  |
| Narcolepsy | Stable angina pectoris | MR Egger | 19 |  | 0.600666903 | 2.216550351 | 0.118974244-41.29545436 | 17.21914 | 0.4396175 |  |  | -0.001871528 | 0.8826656 | 0.5116667 |
| Weighted median | 19 | 0.461934196 | 1.36438128 | 0.596255867-3.122042704 |  |  |  |  |  |  |
| Inverse variance weighted | 19 | 0.041574857 | 1.779768494 | 1.02223954-3.098663049 | 17.24188 | 0.5065385 |  |  |  |  |
| Simple mode | 19 | 0.964421825 | 0.966083041 | 0.216587335-4.309192138 |  |  |  |  |  |  |
| Weighted mode | 19 | 0.926646241 | 1.068215967 | 0.267308265-4.268799372 |  |  |  |  |  |  |
| Narcolepsy | Unstable angina pectoris | MR Egger | 19 |  | 0.658827363 | 2.676642885 | 0.036531415-196.1166066 | 14.00402 | 0.6668177 |  |  | -0.007800169 | 0.676059 | 0.7236667 |
| Weighted median | 19 | 0.23795765 | 0.49512381 | 0.154054457-1.591304739 |  |  |  |  |  |  |
| Inverse variance weighted | 19 | 0.867400274 | 1.07318622 | 0.468352952-2.459104096 | 14.18477 | 0.7169694 |  |  |  |  |
| Simple mode | 19 | 0.492856129 | 0.468933173 | 0.056268413-3.908024239 |  |  |  |  |  |  |
| Weighted mode | 19 | 0.443287315 | 0.458080794 | 0.065042794-3.226153138 |  |  |  |  |  |  |
| Getting up in morning | Stable angina pectoris | MR Egger | 75 |  | 0.663012828 | 0.831230839 | 0.363166742-1.902555021 | 86.79116 | 0.1290507 |  |  | -0.000637501 | 0.9037526 | 0.157 |
| Weighted median | 75 | 0.644483211 | 0.931955664 | 0.690874649-1.257162005 |  |  |  |  |  |  |
| Inverse variance weighted | 75 | 0.033683887 | 0.791117623 | 0.637282432-0.982087475 | 86.80867 | 0.1464719 |  |  |  |  |
| Simple mode | 75 | 0.704132007 | 1.154883838 | 0.550814043-2.421428241 |  |  |  |  |  |  |
| Weighted mode | 75 | 0.891444608 | 1.047373892 | 0.540012028-2.031421549 |  |  |  |  |  |  |
| Getting up in morning | Unstable angina pectoris | MR Egger | 74 | rs11075924 | 0.725398143 | 0.783985428 | 0.202694700945394-3.03230991169581 | 98.14006 | 0.0220283 |  |  | 0.004137194 | 0.6321008 | 0.02733333 |
| Weighted median | 74 | 0.337943155 | 1.253297334 | 0.789754332742042-1.98891495906693 |  |  |  |  |  |  |
| Inverse variance weighted | 74 | 0.665931245 | 1.080108177 | 0.761260383592826-1.53250280498847 | 98.45518 | 0.02524337 | 1.080108177 | 0.6659312 |  |  |
| Simple mode | 74 | 0.587835996 | 1.388892453 | 0.425603322681408-4.53244169483824 |  |  |  |  |  |  |
| Weighted mode | 74 | 0.649169369 | 1.299948087 | 0.421797830196331-4.00633883577716 |  |  |  |  |  |  |
| Insomnia | Stable angina pectoris | MR Egger | 39 |  | 0.595892766 | 1.416002952 | 0.39588534-5.064760316 | 51.34296 | 0.05869814 |  |  | 0.002387779 | 0.7403837 | 0.08733333 |
| Weighted median | 39 | 0.036356211 | 1.587539038 | 1.029788326-2.447376935 |  |  |  |  |  |  |
| Inverse variance weighted | 39 | 0.001278401 | 1.745268836 | 1.243591248-2.449328358 | 51.49761 | 0.0707711 |  |  |  |  |
| Simple mode | 39 | 0.202193749 | 1.874459492 | 0.725690902-4.841728588 |  |  |  |  |  |  |
| Weighted mode | 39 | 0.400337888 | 1.414258568 | 0.636294824-3.143397087 |  |  |  |  |  |  |
| Insomnia | Unstable angina pectoris | MR Egger | 38 | rs2297787 | 0.3677286 | 0.4654209 | 0.08998443-2.407268 | 43.26022 | 0.1890284 |  |  | 0.01303989 | 0.1691096 | 0.1553333 |
| Weighted median | 38 | 0.1054465 | 1.6543183 | 0.89940277-3.042874 |  |  |  |  |  |  |
| Inverse variance weighted | 38 | 0.1380014 | 1.4362904 | 0.89014807-2.317513 | 45.62644 | 0.1561984 |  |  |  |  |
| Simple mode | 38 | 0.2802004 | 2.1837041 | 0.54020241-8.827365 |  |  |  |  |  |  |
| Weighted mode | 38 | 0.3676704 | 1.7470624 | 0.52669674-5.795037 |  |  |  |  |  |  |
| Sleep duration | Stable angina pectoris | MR Egger | 68 |  | 0.956006946 | 1.027376622 | 0.394964291-2.672400385 | 88.95912 | 0.0313602 |  |  | -0.003875078 | 0.4993467 | 0.033 |
| Weighted median | 68 | 0.556114885 | 0.900847193 | 0.63627954-1.275423165 |  |  |  |  |  |  |
| Inverse variance weighted | 68 | 0.017863643 | 0.745764978 | 0.585023829-0.950671366 | 89.58103 | 0.0341707 | 0.745764957 | 0.01786364 |  |  |
| Simple mode | 68 | 0.929867305 | 0.9673409 | 0.463068409-2.020756326 |  |  |  |  |  |  |
| Weighted mode | 68 | 0.907642291 | 0.9673409 | 0.553185066-1.691564858 |  |  |  |  |  |  |
| Sleep duration | Unstable angina pectoris | MR Egger | 67 | rs2683630 | 0.793721823 | 1.206675649 | 0.296835066-4.905303617 | 79.32753 | 0.108956 |  |  | -0.007987952 | 0.3382796 | 0.1183333 |
| Weighted median | 67 | 0.122778264 | 0.663103925 | 0.393529163-1.117342388 |  |  |  |  |  |  |
| Inverse variance weighted | 67 | 0.008063259 | 0.618852682 | 0.433916483-0.882609114 | 80.46327 | 0.1085634 |  |  |  |  |
| Simple mode | 67 | 0.236421317 | 0.474200284 | 0.139450062-1.612519248 |  |  |  |  |  |  |
| Weighted mode | 67 | 0.305610828 | 0.633579233 | 0.266412967-1.506768416 |  |  |  |  |  |  |
| Chronotype | Stable angina pectoris | MR Egger | 148 | rs486416 rs17161045 rs4518438 rs112555644 rs12969848 | 0.9323731 | 0.9866587 | 0.7238904-1.34481 | 205.712 | 0.000831126 |  |  | -0.00064409 | 0.8097404 | 0.000666667 |
| Weighted median | 148 | 0.1239786 | 0.8707843 | 0.7290945-1.04001 |  |  |  |  |  |  |
| Inverse variance weighted | 148 | 0.4261401 | 0.9525965 | 0.8452092-1.073628 | 205.794 | 0.000989501 | 0.952596514 | 0.4261401 |  |  |
| Simple mode | 148 | 0.7251234 | 1.0755531 | 0.7264536-1.592413 |  |  |  |  |  |  |
| Weighted mode | 148 | 0.6423338 | 0.9429735 | 0.7380687-1.204765 |  |  |  |  |  |  |
| Chronotype | Unstable angina pectoris | MR Egger | 153 |  | 0.792419329 | 1.069340111 | 0.649613096-1.760260499 | 233.9272 | 1.74188E-05 |  |  | -0.003825599 | 0.3712334 | <0.000333333333333333 |
| Weighted median | 153 | 0.736468445 | 0.959513903 | 0.754251876-1.220635916 |  |  |  |  |  |  |
| Inverse variance weighted | 153 | 0.128671248 | 0.86549142 | 0.718341269-1.042784857 | 235.1732 | 1.73896E-05 | 0.865491435 | 0.1286712 |  |  |
| Simple mode | 153 | 0.92305148 | 1.035133219 | 0.514280313-2.083495622 |  |  |  |  |  |  |
| Weighted mode | 153 | 0.495463624 | 1.173321754 | 0.741815599-1.855830397 |  |  |  |  |  |  |
| Snoring | Stable angina pectoris | MR Egger | 41 |  | 0.73049592 | 1.723004797 | 0.0796967616394748-37.2505164655929 | 61.46798517 | 0.012347715 |  |  | -0.00388945 | 0.728997344 | 0.020333333 |
| Weighted median | 41 | 0.407793847 | 0.759748071 | 0.396389715191523-1.45618594461531 |  |  |  |  |  |  |
| Inverse variance weighted | 41 | 0.983978063 | 1.005539839 | 0.586446302716245-1.72413119922854 | 61.65991058 | 0.015489908 | 1.005539839 | 0.983978063 |  |  |
| Simple mode | 41 | 0.455123656 | 0.624103663 | 0.183316273528633-2.12477253199203 |  |  |  |  |  |  |
| Weighted mode | 41 | 0.471602604 | 0.656580739 | 0.211122707692891-2.04193225916838 |  |  |  |  |  |  |
| Snoring | Unstable angina pectoris | MR Egger | 39 | rs12603115 rs4523230 | 0.855888451 | 1.463516801 | 0.0247052544916379-86.697403867341 | 46.84175469 | 0.128823456 |  |  | -0.005508617 | 0.714052135 | 0.152 |
| Weighted median | 39 | 0.142241475 | 0.473534854 | 0.174481328697794-1.28515331350744 |  |  |  |  |  |  |
| Inverse variance weighted | 39 | 0.324239178 | 0.687391922 | 0.326229785424635-1.44838906760396 | 47.01435979 | 0.149833229 |  |  |  |  |
| Simple mode | 39 | 0.317559466 | 0.357373306 | 0.0487881641765043-2.61775949012953 |  |  |  |  |  |  |
| Weighted mode | 39 | 0.279667046 | 0.382398881 | 0.0686135532540859-2.13119562299215 |  |  |  |  |  |  |

**Supplementary Table 3**. Reverse MR analysis results of sleep traits on stable angina pectoris or unstable angina pectoris

| exposure | outcome | method | nsnp | outlier | pval | OR | 95%CI | Heterogeneity | | IVW_MRE | | Horizontal Pleiotrophy | | MR-PRESSO |
| --- | --- | --- | --- | --- | --- | --- | --- | --- | --- | --- | --- | --- | --- | --- |
| Q | Q_pval | OR | pval | Egger intercept | Pleiotrophy-pval | pval |
| Stable angina pectoris | Nap during day | MR Egger | 49 | rs2820309 | 0.081175142 | 1.016939961 | 0.998325687900411-1.0359013068698 | 86.72426382 | 0.000373934 | 1.00E+00 | 0.986595158 | -0.001674857 | 0.052844875 | <0.000333333333333333 |
| Weighted median | 49 | 0.506742426 | 1.003749501 | 0.992720651886866-1.01490087719628 |  |  |  |  |  |  |  |
| Inverse variance weighted | 49 | 0.986595158 | 1.000073323 | 0.99155575370417-1.00866405965533 | 94.00452906 | 8.14E-05 |  |  |  |  |  |
| Simple mode | 49 | 0.389824297 | 0.987223429 | 0.958963802061263-1.01631583612946 |  |  |  |  |  |  |  |
| Weighted mode | 49 | 0.275488332 | 1.007596892 | 0.9941380705783-1.02123792178985 |  |  |  |  |  |  |  |
| Stable angina pectoris | Daytime dozing / sleeping (narcolepsy) | MR Egger | 49 | rs2820309 | 0.154081979 | 1.009229131 | 0.996762231152851-1.02185195855847 | 56.3958923 | 0.163812366 |  |  | -0.000552953 | 0.334710414 | 0.157666667 |
| Weighted median | 49 | 0.757659007 | 1.00125669 | 0.99330075434138-1.00927634985189 |  |  |  |  |  |  |  |
| Inverse variance weighted | 49 | 0.198216575 | 1.003671692 | 0.99808382612422-1.00929084179869 | 57.53580414 | 0.162947273 |  |  |  |  |  |
| Simple mode | 49 | 0.812689247 | 1.001853895 | 0.986705122251947-1.0172352451541 |  |  |  |  |  |  |  |
| Weighted mode | 49 | 0.717332625 | 1.001853895 | 0.991916333102475-1.01189101684555 |  |  |  |  |  |  |  |
| Stable angina pectoris | Snoring | MR Egger | 48 | rs11600200  rs4790881 | 0.881981745 | 1.000896545 | 0.989189276639674-1.01274237089976 | 67.94473828 | 0.019332554 | 1.000709823 | 0.790807204 | -1.87E-05 | 0.972380648 | 0.021333333 |
| Weighted median | 48 | 0.888568788 | 0.999494206 | 0.992445679951545-1.0065927913706 |  |  |  |  |  |  |  |
| Inverse variance weighted | 48 | 0.790807204 | 1.000709823 | 0.99547687975133-1.00597027347665 | 67.94652824 | 0.024410524 |  |  |  |  |  |
| Simple mode | 48 | 0.993461842 | 0.999942747 | 0.986413986892688-1.01365705505267 |  |  |  |  |  |  |  |
| Weighted mode | 48 | 0.707744171 | 0.998493354 | 0.990700420741686-1.006347587995 |  |  |  |  |  |  |  |
| Stable angina pectoris | Getting up in morning | MR Egger | 45 | rs11191593  rs11600200  rs13031230  rs2820309  rs7412 | 0.061432292 | 1.015201718 | 0.999690363936128-1.03095374777554 | 41.78298585 | 0.524063779 |  |  | -0.001917258 | 0.009341995 | 0.205333333 |
| Weighted median | 45 | 0.913326116 | 0.999339593 | 0.987521745582367-1.01129886730148 |  |  |  |  |  |  |  |
| Inverse variance weighted | 45 | 0.299085894 | 0.996071454 | 0.988698226698113-1.00349966754479 | 49.19023163 | 0.273127347 |  |  |  |  |  |
| Simple mode | 45 | 0.197433011 | 0.983817887 | 0.960070750980332-1.00815240214508 |  |  |  |  |  |  |  |
| Weighted mode | 45 | 0.410848056 | 1.006810651 | 0.990807532244359-1.02307224638413 |  |  |  |  |  |  |  |
| Stable angina pectoris | Sleeplessness / insomnia | MR Egger | 48 | rs11191593  rs2820309 | 0.956382463 | 0.99955725 | 0.983904507619284-1.01545900955883 | 57.78716895 | 0.114008541 |  |  | -0.000136862 | 0.850085773 | 0.149666667 |
| Weighted median | 48 | 0.877809589 | 1.000739656 | 0.991351161450166-1.01021706371437 |  |  |  |  |  |  |  |
| Inverse variance weighted | 48 | 0.613832083 | 0.998191873 | 0.991199738453088-1.0052333311457 | 57.83255568 | 0.133710598 |  |  |  |  |  |
| Simple mode | 48 | 0.858351675 | 1.001637528 | 0.983896897212877-1.01969803920381 |  |  |  |  |  |  |  |
| Weighted mode | 48 | 0.833052539 | 0.998899753 | 0.988783053683589-1.00911996099019 |  |  |  |  |  |  |  |
| Stable angina pectoris | Sleep duration | MR Egger | 48 | rs13191375  rs2820309 | 0.682401263 | 1.003578845 | 0.986658666624452-1.02078918793762 | 57.34154359 | 0.121914938 |  |  | -0.000622629 | 0.424703526 | 0.141333333 |
| Weighted median | 48 | 0.627442508 | 0.997444782 | 0.987191812252994-1.00780423992267 |  |  |  |  |  |  |  |
| Inverse variance weighted | 48 | 0.489852036 | 0.99732926 | 0.989787580181357-1.00492840392093 | 58.15024793 | 0.127663455 |  |  |  |  |  |
| Simple mode | 48 | 0.619017839 | 0.994790467 | 0.974651751118942-1.01534529842502 |  |  |  |  |  |  |  |
| Weighted mode | 48 | 0.635893636 | 0.99731218 | 0.986333112076083-1.00841345731142 |  |  |  |  |  |  |  |
| Stable angina pectoris | Morning/evening person (chronotype) | MR Egger | 48 | rs11600200  rs2820309 | 0.125304877 | 0.982739828 | 0.961493282398996-1.00445586771881 | 59.04185919 | 0.093906688 |  |  | 0.001292334 | 0.202628299 | 0.086666667 |
| Weighted median | 48 | 0.083398522 | 0.98740544 | 0.973338493396545-1.00167568660303 |  |  |  |  |  |  |  |
| Inverse variance weighted | 48 | 0.369795148 | 0.995454096 | 0.985591235917645-1.00541565450212 | 61.18615272 | 0.080053181 |  |  |  |  |  |
| Simple mode | 48 | 0.598217987 | 1.007721686 | 0.979489623325587-1.03676748875379 |  |  |  |  |  |  |  |
| Weighted mode | 48 | 0.125328241 | 0.987192468 | 0.971339212499158-1.00330446453818 |  |  |  |  |  |  |  |
| Unstable angina pectoris | Nap during day | MR Egger | 15 |  | 0.204312189 | 1.020829896 | 0.990428108100025-1.05216488509357 | 25.9232322 | 0.017408784 | 0.999458593 | 0.924386301 | -0.002592893 | 0.166018564 | 0.013333333 |
| Weighted median | 15 | 0.356143954 | 1.005458612 | 0.993899269595411-1.01715239256823 |  |  |  |  |  |  |  |
| Inverse variance weighted | 15 | 0.924386301 | 0.999458593 | 0.988343229472358-1.01069896593287 | 30.21752075 | 0.007122389 |  |  |  |  |  |
| Simple mode | 15 | 0.762621265 | 1.003608663 | 0.98086432395909-1.02688039928449 |  |  |  |  |  |  |  |
| Weighted mode | 15 | 0.200855397 | 1.008501314 | 0.99611215738043-1.02104456144702 |  |  |  |  |  |  |  |
| Unstable angina pectoris | Daytime dozing / sleeping (narcolepsy) | MR Egger | 15 |  | 0.817118085 | 1.00215302 | 0.984410905831459-1.02021490141405 | 12.84517548 | 0.459840725 |  |  | -0.000138107 | 0.896774423 | 0.594333333 |
| Weighted median | 15 | 0.526963777 | 1.002843705 | 0.994059827010992-1.01170520154381 |  |  |  |  |  |  |  |
| Inverse variance weighted | 15 | 0.75203552 | 1.001024305 | 0.994687039809763-1.00740194496792 | 12.86267822 | 0.537363929 |  |  |  |  |  |
| Simple mode | 15 | 0.323784627 | 1.007518185 | 0.993159292815878-1.0220846760034 |  |  |  |  |  |  |  |
| Weighted mode | 15 | 0.589731751 | 1.00282663 | 0.992823918957501-1.01293011809734 |  |  |  |  |  |  |  |
| Unstable angina pectoris | Snoring | MR Egger | 15 | rs17637472  rs4766566 | 0.556486542 | 0.995279888 | 0.980106260030147-1.01068842795866 | 12.57873861 | 0.480851588 |  |  | 0.000212617 | 0.825563613 | 0.616333333 |
| Weighted median | 15 | 0.491206665 | 0.99751342 | 0.990467394391013-1.00460957050588 |  |  |  |  |  |  |  |
| Inverse variance weighted | 15 | 0.266058391 | 0.996922312 | 0.991521552855434-1.00235248927008 | 12.62931271 | 0.555896832 |  |  |  |  |  |
| Simple mode | 15 | 0.73750271 | 0.998231159 | 0.988151245001476-1.00841389534314 |  |  |  |  |  |  |  |
| Weighted mode | 15 | 0.461264861 | 0.997022358 | 0.989359713213157-1.00474434939654 |  |  |  |  |  |  |  |
| Unstable angina pectoris | Getting up in morning | MR Egger | 17 |  | 0.398220754 | 1.011560052 | 0.985691253348995-1.03810776062182 | 18.94097815 | 0.216420938 |  |  | -0.001919969 | 0.226880084 | 0.181666667 |
| Weighted median | 17 | 0.559791233 | 1.003693659 | 0.991332942415668-1.01620849788402 |  |  |  |  |  |  |  |
| Inverse variance weighted | 17 | 0.394484372 | 0.99593462 | 0.98663968457488-1.00531712209117 | 20.94605645 | 0.180593447 |  |  |  |  |  |
| Simple mode | 17 | 0.784443257 | 1.003083102 | 0.981560346621661-1.02507778906867 |  |  |  |  |  |  |  |
| Weighted mode | 17 | 0.506114385 | 1.004776729 | 0.991073620366531-1.01866930343782 |  |  |  |  |  |  |  |
| Unstable angina pectoris | Sleeplessness / insomnia | MR Egger | 16 | rs4409766 | 0.436593856 | 1.009407746 | 0.986538590168591-1.0328070365416 | 15.99629089 | 0.313600842 |  |  | -0.001726012 | 0.221893859 | 0.278666667 |
| Weighted median | 16 | 0.674401221 | 0.997538159 | 0.986132575335341-1.00907565922699 |  |  |  |  |  |  |  |
| Inverse variance weighted | 16 | 0.286456898 | 0.995429361 | 0.987079433297629-1.00384992263246 | 17.86365825 | 0.269901306 |  |  |  |  |  |
| Simple mode | 16 | 0.970282243 | 1.00037063 | 0.981372952431078-1.01973606935293 |  |  |  |  |  |  |  |
| Weighted mode | 16 | 0.851071543 | 0.998688247 | 0.985327722403744-1.01222993230449 |  |  |  |  |  |  |  |
| Unstable angina pectoris | Sleep duration | MR Egger | 17 |  | 0.307720079 | 0.985859174 | 0.960138645299802-1.01226871312408 | 19.66717922 | 0.1850752 |  |  | 0.001314152 | 0.411288643 | 0.259 |
| Weighted median | 17 | 0.418707256 | 0.995283612 | 0.983944379748768-1.00675352017498 |  |  |  |  |  |  |  |
| Inverse variance weighted | 17 | 0.4503352 | 0.99641959 | 0.987182725621422-1.00574288281066 | 20.60377178 | 0.194248654 |  |  |  |  |  |
| Simple mode | 17 | 0.795886506 | 0.997639162 | 0.980221540209935-1.01536627954814 |  |  |  |  |  |  |  |
| Weighted mode | 17 | 0.425283332 | 0.994690173 | 0.982084244368709-1.00745791087763 |  |  |  |  |  |  |  |
| Unstable angina pectoris | Morning/evening person (chronotype) | MR Egger | 17 |  | 0.174526346 | 0.976307399 | 0.944642097215381-1.00903415196539 | 18.90252464 | 0.218185029 |  |  | 0.002640065 | 0.193532083 | 0.151666667 |
| Weighted median | 17 | 0.442613901 | 0.993707762 | 0.977823944808604-1.00984959757852 |  |  |  |  |  |  |  |
| Inverse variance weighted | 17 | 0.674891537 | 0.997428975 | 0.985502298565523-1.00949999034427 | 21.23764492 | 0.169555589 |  |  |  |  |  |
| Simple mode | 17 | 0.871112081 | 1.002938712 | 0.968554581228908-1.03854349531451 |  |  |  |  |  |  |  |
| Weighted mode | 17 | 0.258473674 | 0.988263512 | 0.968937899135167-1.00797457709763 |  |  |  |  |  |  |  |

**Supplementary Table 4.** SNPs and F value for mediators

| SNP of hypertension | chr.exposure | pos.exposure | beta.exposure | se.exposure | pval.exposure | samplesize.exposure | id.exposure | SNP | effect_allele.exposure | other_allele.exposure | eaf.exposure | exposure | mr_keep.exposure | pval_origin.exposure | data_source.exposure | R2 | F |
| --- | --- | --- | --- | --- | --- | --- | --- | --- | --- | --- | --- | --- | --- | --- | --- | --- | --- |
| 1 | 27260783 | 0.098 | 0.0176 | 2.74E-08 | 218754 | finn-b-I9_HYPTENS | rs7545442 | T | C | 0.07246 | Hypertension || id:finn-b-I9_HYPTENS | TRUE | reported | igd | 0.000141713 | 31.00436529 |
| 1 | 230873488 | 0.0701 | 0.0112 | 4.04E-10 | 218754 | finn-b-I9_HYPTENS | rs1317181 | T | G | 0.2099 | Hypertension || id:finn-b-I9_HYPTENS | TRUE | reported | igd | 0.000179047 | 39.1738287 |
| 1 | 11833976 | -0.1253 | 0.0145 | 4.62E-18 | 218754 | finn-b-I9_HYPTENS | rs76778513 | T | A | 0.113 | Hypertension || id:finn-b-I9_HYPTENS | TRUE | reported | igd | 0.000341242 | 74.67275367 |
| 1 | 11981282 | -0.1373 | 0.0175 | 5.01E-15 | 218754 | finn-b-I9_HYPTENS | rs143439093 | G | A | 0.07436 | Hypertension || id:finn-b-I9_HYPTENS | TRUE | reported | igd | 0.000281311 | 61.55466987 |
| 1 | 25136203 | 0.0668 | 0.0111 | 1.87E-09 | 218754 | finn-b-I9_HYPTENS | rs6668768 | T | C | 0.2144 | Hypertension || id:finn-b-I9_HYPTENS | TRUE | reported | igd | 0.000165531 | 36.21620975 |
| 1 | 113046879 | 0.1321 | 0.0121 | 1.40E-27 | 218754 | finn-b-I9_HYPTENS | rs3790604 | A | C | 0.1709 | Hypertension || id:finn-b-I9_HYPTENS | TRUE | reported | igd | 0.000544556 | 119.1875586 |
| 1 | 10798489 | 0.1033 | 0.0093 | 1.04E-28 | 218754 | finn-b-I9_HYPTENS | rs34071855 | G | C | 0.415 | Hypertension || id:finn-b-I9_HYPTENS | TRUE | reported | igd | 0.000563682 | 123.3760254 |
| 2 | 164999883 | -0.0603 | 0.0092 | 6.95E-11 | 218754 | finn-b-I9_HYPTENS | rs1374264 | C | A | 0.4146 | Hypertension || id:finn-b-I9_HYPTENS | TRUE | reported | igd | 0.000196344 | 42.95908266 |
| 2 | 159462894 | -0.079 | 0.0134 | 3.56E-09 | 218754 | finn-b-I9_HYPTENS | rs10206833 | A | G | 0.8661 | Hypertension || id:finn-b-I9_HYPTENS | TRUE | reported | igd | 0.000158862 | 34.75686645 |
| 2 | 26911509 | -0.0953 | 0.0092 | 3.38E-25 | 218754 | finn-b-I9_HYPTENS | rs1275984 | C | A | 0.549 | Hypertension || id:finn-b-I9_HYPTENS | TRUE | reported | igd | 0.000490277 | 107.3015946 |
| 2 | 164447403 | 0.0587 | 0.0107 | 3.54E-08 | 218754 | finn-b-I9_HYPTENS | rs10185395 | T | G | 0.243 | Hypertension || id:finn-b-I9_HYPTENS | TRUE | reported | igd | 0.00013756 | 30.09571576 |
| 3 | 14894140 | 0.0984 | 0.0153 | 1.30E-10 | 218754 | finn-b-I9_HYPTENS | rs4685218 | T | C | 0.09873 | Hypertension || id:finn-b-I9_HYPTENS | TRUE | reported | igd | 0.000189047 | 41.3621747 |
| 3 | 27562988 | 0.0627 | 0.0093 | 1.75E-11 | 218754 | finn-b-I9_HYPTENS | rs2643826 | T | C | 0.4047 | Hypertension || id:finn-b-I9_HYPTENS | TRUE | reported | igd | 0.000207741 | 45.4532785 |
| 3 | 168774754 | -0.1096 | 0.0192 | 1.06E-08 | 218754 | finn-b-I9_HYPTENS | rs16853076 | C | T | 0.06089 | Hypertension || id:finn-b-I9_HYPTENS | TRUE | reported | igd | 0.000148935 | 32.58477153 |
| 4 | 81182554 | 0.1157 | 0.0099 | 1.34E-31 | 218754 | finn-b-I9_HYPTENS | rs12509595 | C | T | 0.3122 | Hypertension || id:finn-b-I9_HYPTENS | TRUE | reported | igd | 0.000623978 | 136.581651 |
| 4 | 156639174 | -0.0751 | 0.0096 | 4.48E-15 | 218754 | finn-b-I9_HYPTENS | rs3796585 | A | G | 0.3465 | Hypertension || id:finn-b-I9_HYPTENS | TRUE | reported | igd | 0.000279679 | 61.19746566 |
| 4 | 185877562 | -0.1328 | 0.0222 | 2.27E-09 | 218754 | finn-b-I9_HYPTENS | rs149150643 | C | T | 0.04503 | Hypertension || id:finn-b-I9_HYPTENS | TRUE | reported | igd | 0.000163555 | 35.78378127 |
| 4 | 106911742 | 0.0697 | 0.0121 | 9.34E-09 | 218754 | finn-b-I9_HYPTENS | rs13112725 | C | G | 0.8285 | Hypertension || id:finn-b-I9_HYPTENS | TRUE | reported | igd | 0.000151661 | 33.18110501 |
| 5 | 32832474 | 0.0651 | 0.0092 | 1.92E-12 | 218754 | finn-b-I9_HYPTENS | rs10059884 | A | C | 0.5856 | Hypertension || id:finn-b-I9_HYPTENS | TRUE | reported | igd | 0.000228839 | 50.07054883 |
| 5 | 157877453 | -0.0527 | 0.0094 | 2.09E-08 | 218754 | finn-b-I9_HYPTENS | rs4371736 | C | G | 0.3821 | Hypertension || id:finn-b-I9_HYPTENS | TRUE | reported | igd | 0.000143664 | 31.43124274 |
| 5 | 60972519 | 0.1977 | 0.0303 | 7.04E-11 | 218754 | finn-b-I9_HYPTENS | rs188155432 | T | C | 0.02363 | Hypertension || id:finn-b-I9_HYPTENS | TRUE | reported | igd | 0.000194575 | 42.57200564 |
| 5 | 127871750 | 0.0682 | 0.01 | 7.68E-12 | 218754 | finn-b-I9_HYPTENS | rs6860901 | T | C | 0.2979 | Hypertension || id:finn-b-I9_HYPTENS | TRUE | reported | igd | 0.000212579 | 46.51197475 |
| 6 | 127142458 | 0.0528 | 0.0091 | 7.13E-09 | 218754 | finn-b-I9_HYPTENS | rs62426324 | T | C | 0.5009 | Hypertension || id:finn-b-I9_HYPTENS | TRUE | reported | igd | 0.000153873 | 33.66519154 |
| 6 | 26092170 | 0.0886 | 0.0146 | 1.28E-09 | 218754 | finn-b-I9_HYPTENS | rs2032451 | T | G | 0.1098 | Hypertension || id:finn-b-I9_HYPTENS | TRUE | reported | igd | 0.000168319 | 36.82627243 |
| 6 | 126218961 | 0.0574 | 0.0103 | 2.15E-08 | 218754 | finn-b-I9_HYPTENS | rs6918791 | G | C | 0.728 | Hypertension || id:finn-b-I9_HYPTENS | TRUE | reported | igd | 0.000141949 | 31.05598904 |
| 6 | 150984431 | -0.1345 | 0.0172 | 6.23E-15 | 218754 | finn-b-I9_HYPTENS | rs62434119 | T | C | 0.07595 | Hypertension || id:finn-b-I9_HYPTENS | TRUE | reported | igd | 0.000279454 | 61.14820378 |
| 7 | 150077617 | -0.06 | 0.0103 | 5.09E-09 | 218754 | finn-b-I9_HYPTENS | rs2190994 | T | G | 0.276 | Hypertension || id:finn-b-I9_HYPTENS | TRUE | reported | igd | 0.000155097 | 33.93314249 |
| 7 | 27245993 | 0.1376 | 0.0157 | 1.92E-18 | 218754 | finn-b-I9_HYPTENS | rs71554083 | G | GAGCA | 0.9044 | Hypertension || id:finn-b-I9_HYPTENS | TRUE | reported | igd | 0.000351018 | 76.81279928 |
| 7 | 27328187 | 0.0735 | 0.0133 | 3.39E-08 | 218754 | finn-b-I9_HYPTENS | rs6961048 | G | C | 0.1355 | Hypertension || id:finn-b-I9_HYPTENS | TRUE | reported | igd | 0.00013959 | 30.53988699 |
| 7 | 150690176 | 0.1721 | 0.0179 | 7.08E-22 | 218754 | finn-b-I9_HYPTENS | rs3918226 | T | C | 0.0699 | Hypertension || id:finn-b-I9_HYPTENS | TRUE | reported | igd | 0.000422392 | 92.43824852 |
| 7 | 106414069 | 0.062 | 0.01 | 5.21E-10 | 218754 | finn-b-I9_HYPTENS | rs2392929 | G | T | 0.2979 | Hypertension || id:finn-b-I9_HYPTENS | TRUE | reported | igd | 0.000175692 | 38.43964855 |
| 7 | 70045931 | -0.0598 | 0.0103 | 5.68E-09 | 218754 | finn-b-I9_HYPTENS | rs62455829 | G | A | 0.2782 | Hypertension || id:finn-b-I9_HYPTENS | TRUE | reported | igd | 0.000154065 | 33.70729857 |
| 9 | 112751571 | 0.0584 | 0.0099 | 3.87E-09 | 218754 | finn-b-I9_HYPTENS | rs10217559 | T | C | 0.6936 | Hypertension || id:finn-b-I9_HYPTENS | TRUE | reported | igd | 0.000159049 | 34.79776368 |
| 9 | 22096055 | 0.0507 | 0.0092 | 3.52E-08 | 218754 | finn-b-I9_HYPTENS | rs10757274 | G | A | 0.432 | Hypertension || id:finn-b-I9_HYPTENS | TRUE | reported | igd | 0.000138811 | 30.3694057 |
| 9 | 136454663 | -0.1222 | 0.0187 | 6.32E-11 | 218754 | finn-b-I9_HYPTENS | rs72779268 | A | C | 0.06436 | Hypertension || id:finn-b-I9_HYPTENS | TRUE | reported | igd | 0.000195172 | 42.70268945 |
| 10 | 96039597 | -0.0751 | 0.0096 | 5.64E-15 | 218754 | finn-b-I9_HYPTENS | rs2274224 | C | G | 0.3456 | Hypertension || id:finn-b-I9_HYPTENS | TRUE | reported | igd | 0.000279679 | 61.19746566 |
| 10 | 18440444 | 0.06 | 0.0094 | 1.45E-10 | 218754 | finn-b-I9_HYPTENS | rs1888693 | A | G | 0.386 | Hypertension || id:finn-b-I9_HYPTENS | TRUE | reported | igd | 0.000186213 | 40.74204489 |
| 10 | 104849116 | -0.1089 | 0.0158 | 5.49E-12 | 218754 | finn-b-I9_HYPTENS | rs10786736 | C | G | 0.09173 | Hypertension || id:finn-b-I9_HYPTENS | TRUE | reported | igd | 0.000217116 | 47.50481323 |
| 10 | 115781547 | 0.0799 | 0.0096 | 8.71E-17 | 218754 | finn-b-I9_HYPTENS | rs2782981 | C | T | 0.6546 | Hypertension || id:finn-b-I9_HYPTENS | TRUE | reported | igd | 0.000316561 | 69.27030852 |
| 11 | 1920255 | 0.0759 | 0.0109 | 3.12E-12 | 218754 | finn-b-I9_HYPTENS | rs7483477 | G | T | 0.2348 | Hypertension || id:finn-b-I9_HYPTENS | TRUE | reported | igd | 0.000221604 | 48.48714191 |
| 11 | 65566719 | -0.0613 | 0.0093 | 5.42E-11 | 218754 | finn-b-I9_HYPTENS | rs557675 | G | T | 0.3969 | Hypertension || id:finn-b-I9_HYPTENS | TRUE | reported | igd | 0.00019857 | 43.44612839 |
| 11 | 10155174 | 0.0682 | 0.0114 | 2.47E-09 | 218754 | finn-b-I9_HYPTENS | rs7123467 | G | C | 0.202 | Hypertension || id:finn-b-I9_HYPTENS | TRUE | reported | igd | 0.000163581 | 35.78945426 |
| 11 | 100610546 | 0.0632 | 0.0104 | 1.36E-09 | 218754 | finn-b-I9_HYPTENS | rs604723 | C | T | 0.741 | Hypertension || id:finn-b-I9_HYPTENS | TRUE | reported | igd | 0.000168787 | 36.92865645 |
| 12 | 54441498 | -0.0748 | 0.0094 | 2.13E-15 | 218754 | finn-b-I9_HYPTENS | rs7134677 | T | C | 0.3819 | Hypertension || id:finn-b-I9_HYPTENS | TRUE | reported | igd | 0.000289378 | 63.32038079 |
| 12 | 111865049 | -0.0816 | 0.0093 | 1.37E-18 | 218754 | finn-b-I9_HYPTENS | rs7310615 | G | C | 0.5863 | Hypertension || id:finn-b-I9_HYPTENS | TRUE | reported | igd | 0.000351808 | 76.98576856 |
| 12 | 90101892 | 0.0663 | 0.0106 | 4.59E-10 | 218754 | finn-b-I9_HYPTENS | rs1358350 | A | T | 0.7541 | Hypertension || id:finn-b-I9_HYPTENS | TRUE | reported | igd | 0.000178806 | 39.12112684 |
| 12 | 12883570 | -0.0606 | 0.0092 | 5.01E-11 | 218754 | finn-b-I9_HYPTENS | rs12828438 | G | A | 0.5354 | Hypertension || id:finn-b-I9_HYPTENS | TRUE | reported | igd | 0.000198302 | 43.38759954 |
| 12 | 115556307 | -0.0592 | 0.0096 | 5.91E-10 | 218754 | finn-b-I9_HYPTENS | rs35427 | G | T | 0.3644 | Hypertension || id:finn-b-I9_HYPTENS | TRUE | reported | igd | 0.000173808 | 38.0274301 |
| 13 | 72365326 | 0.0849 | 0.0153 | 2.70E-08 | 218754 | finn-b-I9_HYPTENS | rs303949 | C | A | 0.09934 | Hypertension || id:finn-b-I9_HYPTENS | TRUE | reported | igd | 0.000140739 | 30.79133709 |
| 13 | 22318331 | 0.0595 | 0.0093 | 1.36E-10 | 218754 | finn-b-I9_HYPTENS | rs629929 | T | G | 0.5795 | Hypertension || id:finn-b-I9_HYPTENS | TRUE | reported | igd | 0.000187081 | 40.93210351 |
| 15 | 81006712 | 0.054 | 0.0093 | 7.35E-09 | 218754 | finn-b-I9_HYPTENS | rs2627313 | T | C | 0.4006 | Hypertension || id:finn-b-I9_HYPTENS | TRUE | reported | igd | 0.000154099 | 33.71457209 |
| 15 | 91429287 | 0.0837 | 0.0103 | 5.58E-16 | 218754 | finn-b-I9_HYPTENS | rs4932373 | C | A | 0.2674 | Hypertension || id:finn-b-I9_HYPTENS | TRUE | reported | igd | 0.000301779 | 66.03474361 |
| 15 | 75114322 | -0.055 | 0.0094 | 4.21E-09 | 218754 | finn-b-I9_HYPTENS | rs11636952 | C | T | 0.6071 | Hypertension || id:finn-b-I9_HYPTENS | TRUE | reported | igd | 0.000156475 | 34.23463494 |
| 16 | 53826028 | 0.0617 | 0.0093 | 2.76E-11 | 218754 | finn-b-I9_HYPTENS | rs28567725 | C | T | 0.4136 | Hypertension || id:finn-b-I9_HYPTENS | TRUE | reported | igd | 0.000201169 | 44.01497508 |
| 17 | 59482169 | 0.0614 | 0.0102 | 1.65E-09 | 218754 | finn-b-I9_HYPTENS | rs35619711 | G | C | 0.7217 | Hypertension || id:finn-b-I9_HYPTENS | TRUE | reported | igd | 0.000165618 | 36.23534729 |
| 17 | 47357173 | -0.1364 | 0.0215 | 2.11E-10 | 218754 | finn-b-I9_HYPTENS | rs79873333 | T | C | 0.04758 | Hypertension || id:finn-b-I9_HYPTENS | TRUE | reported | igd | 0.000183957 | 40.24832861 |
| 17 | 56404934 | -0.1088 | 0.019 | 1.10E-08 | 218754 | finn-b-I9_HYPTENS | rs117515309 | A | C | 0.06182 | Hypertension || id:finn-b-I9_HYPTENS | TRUE | reported | igd | 0.000149875 | 32.79039273 |
| 17 | 61545486 | -0.1068 | 0.0166 | 1.41E-10 | 218754 | finn-b-I9_HYPTENS | rs9899012 | A | G | 0.08387 | Hypertension || id:finn-b-I9_HYPTENS | TRUE | reported | igd | 0.000189186 | 41.39256683 |
| 17 | 45138033 | 0.0707 | 0.0115 | 7.54E-10 | 218754 | finn-b-I9_HYPTENS | rs145153053 | G | A | 0.1963 | Hypertension || id:finn-b-I9_HYPTENS | TRUE | reported | igd | 0.000172748 | 37.79542004 |
| 19 | 11526765 | -0.0833 | 0.0093 | 2.66E-19 | 218754 | finn-b-I9_HYPTENS | rs167479 | T | G | 0.4249 | Hypertension || id:finn-b-I9_HYPTENS | TRUE | reported | igd | 0.000366614 | 80.22692288 |
| 19 | 12018867 | -0.2554 | 0.0436 | 4.69E-09 | 218754 | finn-b-I9_HYPTENS | rs189498068 | G | A | 0.01165 | Hypertension || id:finn-b-I9_HYPTENS | TRUE | reported | igd | 0.000156836 | 34.31348562 |
| 20 | 57734912 | 0.1406 | 0.0122 | 1.03E-30 | 218754 | finn-b-I9_HYPTENS | rs78412528 | A | G | 0.1674 | Hypertension || id:finn-b-I9_HYPTENS | TRUE | reported | igd | 0.00060678 | 132.8149641 |
| SNP of T2DM | 2 | 227121918 | 0.0756 | 0.0111 | 1.03E-11 | 211766 | finn-b-T2D | rs2943656 | G | A | 0.6173 | Type 2 diabetes, definitions combined || id:finn-b-T2D | TRUE | reported | igd | 0.000219001 | 46.3867058 |
| 2 | 43480221 | 0.1396 | 0.0249 | 2.04E-08 | 211766 | finn-b-T2D | rs62137406 | T | C | 0.04885 | Type 2 diabetes, definitions combined || id:finn-b-T2D | TRUE | reported | igd | 0.000148406 | 31.43171231 |
| 2 | 43453721 | -0.1809 | 0.0306 | 3.47E-09 | 211766 | finn-b-T2D | rs112694524 | A | G | 0.0335 | Type 2 diabetes, definitions combined || id:finn-b-T2D | TRUE | reported | igd | 0.000165009 | 34.94863187 |
| 2 | 165508389 | -0.0703 | 0.0113 | 5.17E-10 | 211766 | finn-b-T2D | rs10184004 | T | C | 0.3577 | Type 2 diabetes, definitions combined || id:finn-b-T2D | TRUE | reported | igd | 0.000182733 | 38.70344839 |
| 3 | 170629884 | 0.0735 | 0.0116 | 2.47E-10 | 211766 | finn-b-T2D | rs6786846 | A | G | 0.681 | Type 2 diabetes, definitions combined || id:finn-b-T2D | TRUE | reported | igd | 0.000189548 | 40.14713867 |
| 3 | 12344730 | -0.1102 | 0.0144 | 2.00E-14 | 211766 | finn-b-T2D | rs11712037 | G | C | 0.1708 | Type 2 diabetes, definitions combined || id:finn-b-T2D | TRUE | reported | igd | 0.000276479 | 58.56445461 |
| 3 | 123124513 | -0.0919 | 0.0139 | 3.73E-11 | 211766 | finn-b-T2D | rs71330995 | A | G | 0.1878 | Type 2 diabetes, definitions combined || id:finn-b-T2D | TRUE | reported | igd | 0.000206374 | 43.71166211 |
| 3 | 185503456 | 0.0937 | 0.0117 | 1.10E-15 | 211766 | finn-b-T2D | rs6780171 | A | T | 0.3063 | Type 2 diabetes, definitions combined || id:finn-b-T2D | TRUE | reported | igd | 0.000302775 | 64.13621946 |
| 3 | 186665645 | 0.0607 | 0.0109 | 2.39E-08 | 211766 | finn-b-T2D | rs3887925 | T | C | 0.4629 | Type 2 diabetes, definitions combined || id:finn-b-T2D | TRUE | reported | igd | 0.000146421 | 31.0113223 |
| 4 | 45182527 | 0.0741 | 0.0108 | 7.51E-12 | 211766 | finn-b-T2D | rs10938397 | G | A | 0.4735 | Type 2 diabetes, definitions combined || id:finn-b-T2D | TRUE | reported | igd | 0.000222247 | 47.07440109 |
| 4 | 6304242 | 0.0833 | 0.0111 | 6.90E-14 | 211766 | finn-b-T2D | rs1046317 | C | T | 0.6106 | Type 2 diabetes, definitions combined || id:finn-b-T2D | TRUE | reported | igd | 0.000265872 | 56.31705597 |
| 5 | 102143311 | 0.1373 | 0.0232 | 3.09E-09 | 211766 | finn-b-T2D | rs76177300 | A | G | 0.05776 | Type 2 diabetes, definitions combined || id:finn-b-T2D | TRUE | reported | igd | 0.000165363 | 35.02361764 |
| 6 | 20673880 | 0.1281 | 0.0115 | 5.43E-29 | 211766 | finn-b-T2D | rs7451008 | C | T | 0.3291 | Type 2 diabetes, definitions combined || id:finn-b-T2D | TRUE | reported | igd | 0.000585588 | 124.079055 |
| 6 | 131881146 | 0.0759 | 0.013 | 5.89E-09 | 211766 | finn-b-T2D | rs2781655 | T | C | 0.2218 | Type 2 diabetes, definitions combined || id:finn-b-T2D | TRUE | reported | igd | 0.000160942 | 34.0873112 |
| 6 | 7232186 | 0.0642 | 0.0109 | 4.37E-09 | 211766 | finn-b-T2D | rs9505086 | C | T | 0.4438 | Type 2 diabetes, definitions combined || id:finn-b-T2D | TRUE | reported | igd | 0.000163791 | 34.69069164 |
| 7 | 44255643 | 0.0896 | 0.0133 | 1.82E-11 | 211766 | finn-b-T2D | rs878521 | A | G | 0.2072 | Type 2 diabetes, definitions combined || id:finn-b-T2D | TRUE | reported | igd | 0.000214271 | 45.38461292 |
| 7 | 150537635 | 0.0771 | 0.0114 | 1.56E-11 | 211766 | finn-b-T2D | rs62492368 | A | G | 0.3401 | Type 2 diabetes, definitions combined || id:finn-b-T2D | TRUE | reported | igd | 0.000215948 | 45.73987272 |
| 7 | 102086552 | 0.099 | 0.014 | 1.65E-12 | 211766 | finn-b-T2D | rs77655131 | T | C | 0.1834 | Type 2 diabetes, definitions combined || id:finn-b-T2D | TRUE | reported | igd | 0.000236078 | 50.00462977 |
| 7 | 28142186 | 0.0671 | 0.0115 | 5.19E-09 | 211766 | finn-b-T2D | rs10245867 | T | G | 0.3308 | Type 2 diabetes, definitions combined || id:finn-b-T2D | TRUE | reported | igd | 0.00016074 | 34.04436656 |
| 8 | 118185733 | -0.0816 | 0.0111 | 2.48E-13 | 211766 | finn-b-T2D | rs11558471 | G | A | 0.3785 | Type 2 diabetes, definitions combined || id:finn-b-T2D | TRUE | reported | igd | 0.000255133 | 54.04185629 |
| 9 | 139248082 | 0.1012 | 0.0118 | 8.39E-18 | 211766 | finn-b-T2D | rs28642213 | G | A | 0.6971 | Type 2 diabetes, definitions combined || id:finn-b-T2D | TRUE | reported | igd | 0.000347208 | 73.55173281 |
| 9 | 22132698 | -0.126 | 0.0151 | 8.78E-17 | 211766 | finn-b-T2D | rs10965246 | C | T | 0.152 | Type 2 diabetes, definitions combined || id:finn-b-T2D | TRUE | reported | igd | 0.000328691 | 69.62786747 |
| 9 | 22137685 | 0.1144 | 0.0121 | 2.84E-21 | 211766 | finn-b-T2D | rs7018475 | G | T | 0.2788 | Type 2 diabetes, definitions combined || id:finn-b-T2D | TRUE | reported | igd | 0.000421931 | 89.38758553 |
| 10 | 114754071 | 0.3058 | 0.0137 | 6.00E-110 | 211766 | finn-b-T2D | rs34872471 | C | T | 0.2011 | Type 2 diabetes, definitions combined || id:finn-b-T2D | TRUE | reported | igd | 0.002347237 | 498.2298302 |
| 10 | 12309268 | 0.086 | 0.0123 | 3.00E-12 | 211766 | finn-b-T2D | rs11257658 | A | G | 0.2647 | Type 2 diabetes, definitions combined || id:finn-b-T2D | TRUE | reported | igd | 0.000230797 | 48.88578326 |
| 10 | 94460650 | -0.0789 | 0.0108 | 3.16E-13 | 211766 | finn-b-T2D | rs10882099 | C | T | 0.4771 | Type 2 diabetes, definitions combined || id:finn-b-T2D | TRUE | reported | igd | 0.000251965 | 53.37063792 |
| 10 | 114736670 | -0.2192 | 0.0359 | 1.05E-09 | 211766 | finn-b-T2D | rs114322470 | G | T | 0.02364 | Type 2 diabetes, definitions combined || id:finn-b-T2D | TRUE | reported | igd | 0.000176019 | 37.28104702 |
| 10 | 71449878 | 0.1553 | 0.028 | 3.05E-08 | 211766 | finn-b-T2D | rs182788819 | T | C | 0.03872 | Type 2 diabetes, definitions combined || id:finn-b-T2D | TRUE | reported | igd | 0.000145247 | 30.76257936 |
| 11 | 17408630 | -0.0616 | 0.0108 | 1.27E-08 | 211766 | finn-b-T2D | rs5215 | T | C | 0.5286 | Type 2 diabetes, definitions combined || id:finn-b-T2D | TRUE | reported | igd | 0.0001536 | 32.53192869 |
| 11 | 2195267 | -0.0659 | 0.0114 | 8.42E-09 | 211766 | finn-b-T2D | rs10770143 | T | C | 0.6621 | Type 2 diabetes, definitions combined || id:finn-b-T2D | TRUE | reported | igd | 0.000157774 | 33.41619717 |
| 11 | 72428148 | -0.0864 | 0.0117 | 1.89E-13 | 211766 | finn-b-T2D | rs73541184 | A | G | 0.3086 | Type 2 diabetes, definitions combined || id:finn-b-T2D | TRUE | reported | igd | 0.000257447 | 54.53202935 |
| 11 | 2858546 | -0.1977 | 0.0201 | 8.16E-23 | 211766 | finn-b-T2D | rs2237897 | T | C | 0.08139 | Type 2 diabetes, definitions combined || id:finn-b-T2D | TRUE | reported | igd | 0.000456632 | 96.74245901 |
| 11 | 92708710 | 0.1317 | 0.0113 | 1.99E-31 | 211766 | finn-b-T2D | rs10830963 | G | C | 0.3567 | Type 2 diabetes, definitions combined || id:finn-b-T2D | TRUE | reported | igd | 0.000641032 | 135.8346479 |
| 12 | 4521511 | -0.2434 | 0.0285 | 1.23E-17 | 211766 | finn-b-T2D | rs78470967 | A | T | 0.03951 | Type 2 diabetes, definitions combined || id:finn-b-T2D | TRUE | reported | igd | 0.000344307 | 72.93690425 |
| 12 | 66179054 | 0.255 | 0.0359 | 1.16E-12 | 211766 | finn-b-T2D | rs73113806 | T | C | 0.02329 | Type 2 diabetes, definitions combined || id:finn-b-T2D | TRUE | reported | igd | 0.000238195 | 50.45304264 |
| 12 | 4365572 | -0.2575 | 0.0404 | 1.92E-10 | 211766 | finn-b-T2D | rs74862545 | T | C | 0.01954 | Type 2 diabetes, definitions combined || id:finn-b-T2D | TRUE | reported | igd | 0.000191802 | 40.62446315 |
| 12 | 4271088 | -0.3726 | 0.038 | 1.04E-22 | 211766 | finn-b-T2D | rs112108223 | A | G | 0.02244 | Type 2 diabetes, definitions combined || id:finn-b-T2D | TRUE | reported | igd | 0.000453801 | 96.14227758 |
| 12 | 4384844 | -0.5078 | 0.0339 | 8.71E-51 | 211766 | finn-b-T2D | rs76895963 | G | T | 0.03126 | Type 2 diabetes, definitions combined || id:finn-b-T2D | TRUE | reported | igd | 0.001058449 | 224.3788382 |
| 12 | 121432117 | -0.0782 | 0.0121 | 9.50E-11 | 211766 | finn-b-T2D | rs56348580 | C | G | 0.2829 | Type 2 diabetes, definitions combined || id:finn-b-T2D | TRUE | reported | igd | 0.000197197 | 41.76751756 |
| 12 | 71526677 | -0.0596 | 0.0109 | 4.57E-08 | 211766 | finn-b-T2D | rs1397566 | G | A | 0.4276 | Type 2 diabetes, definitions combined || id:finn-b-T2D | TRUE | reported | igd | 0.000141163 | 29.89753768 |
| 13 | 80718654 | -0.0767 | 0.0112 | 6.18E-12 | 211766 | finn-b-T2D | rs7998259 | A | G | 0.3895 | Type 2 diabetes, definitions combined || id:finn-b-T2D | TRUE | reported | igd | 0.000221413 | 46.89759598 |
| 15 | 62291191 | -0.1278 | 0.0229 | 2.44E-08 | 211766 | finn-b-T2D | rs28553330 | C | T | 0.0605 | Type 2 diabetes, definitions combined || id:finn-b-T2D | TRUE | reported | igd | 0.000147052 | 31.14487852 |
| 16 | 77261943 | 0.1308 | 0.0232 | 1.76E-08 | 211766 | finn-b-T2D | rs12449219 | G | C | 0.05832 | Type 2 diabetes, definitions combined || id:finn-b-T2D | TRUE | reported | igd | 0.000150078 | 31.78596615 |
| 16 | 53800754 | 0.1173 | 0.0109 | 6.11E-27 | 211766 | finn-b-T2D | rs9940128 | A | G | 0.4288 | Type 2 diabetes, definitions combined || id:finn-b-T2D | TRUE | reported | igd | 0.000546574 | 115.8080974 |
| 16 | 75236763 | -0.1638 | 0.0194 | 2.95E-17 | 211766 | finn-b-T2D | rs55993634 | G | C | 0.08715 | Type 2 diabetes, definitions combined || id:finn-b-T2D | TRUE | reported | igd | 0.000336529 | 71.2886242 |
| 17 | 36103565 | -0.0669 | 0.0113 | 3.55E-09 | 211766 | finn-b-T2D | rs11263763 | A | G | 0.646 | Type 2 diabetes, definitions combined || id:finn-b-T2D | TRUE | reported | igd | 0.000165488 | 35.05026024 |
| 17 | 4014384 | 0.0642 | 0.0117 | 4.48E-08 | 211766 | finn-b-T2D | rs7224685 | T | G | 0.3016 | Type 2 diabetes, definitions combined || id:finn-b-T2D | TRUE | reported | igd | 0.000142161 | 30.10885436 |
| 18 | 57826570 | 0.0771 | 0.014 | 3.82E-08 | 211766 | finn-b-T2D | rs12967878 | C | T | 0.1809 | Type 2 diabetes, definitions combined || id:finn-b-T2D | TRUE | reported | igd | 0.000143197 | 30.32833601 |
| 19 | 7976529 | -0.0672 | 0.0116 | 6.60E-09 | 211766 | finn-b-T2D | rs2303700 | C | T | 0.6741 | Type 2 diabetes, definitions combined || id:finn-b-T2D | TRUE | reported | igd | 0.000158452 | 33.55973061 |
| 19 | 46157860 | -0.061 | 0.0109 | 2.02E-08 | 211766 | finn-b-T2D | rs7507893 | A | G | 0.4965 | Type 2 diabetes, definitions combined || id:finn-b-T2D | TRUE | reported | igd | 0.000147872 | 31.31861676 |
| 19 | 19393714 | 0.0964 | 0.0149 | 9.42E-11 | 211766 | finn-b-T2D | rs8100204 | A | G | 0.1597 | Type 2 diabetes, definitions combined || id:finn-b-T2D | TRUE | reported | igd | 0.000197624 | 41.85789935 |
| 19 | 45411941 | -0.0807 | 0.0142 | 1.35E-08 | 211766 | finn-b-T2D | rs429358 | C | T | 0.1827 | Type 2 diabetes, definitions combined || id:finn-b-T2D | TRUE | reported | igd | 0.000152492 | 32.29730457 |
| 20 | 57607363 | -0.2275 | 0.0253 | 2.21E-19 | 211766 | finn-b-T2D | rs45551238 | T | C | 0.05006 | Type 2 diabetes, definitions combined || id:finn-b-T2D | TRUE | reported | igd | 0.00038168 | 80.85700635 |
| 20 | 42888082 | 0.186 | 0.0285 | 6.99E-11 | 211766 | finn-b-T2D | rs6073386 | G | A | 0.0366 | Type 2 diabetes, definitions combined || id:finn-b-T2D | TRUE | reported | igd | 0.000201091 | 42.59239552 |
| 22 | 20796117 | -0.0745 | 0.0118 | 2.71E-10 | 211766 | finn-b-T2D | rs8353 | T | G | 0.3009 | Type 2 diabetes, definitions combined || id:finn-b-T2D | TRUE | reported | igd | 0.000188196 | 39.86065485 |
| SNP of hyperlipidemia | 1 | 43645751 | 0.3744 | 0.0743 | 4.68E-07 | 197772 | finn-b-E4_HYPERLIPMIX | rs2025591 | A | C | 0.2408 | || id:finn-b-E4_HYPERLIPMIX | TRUE | reported | igd | 0.000128373 | 25.39157619 |
| 2 | 21119850 | 0.6061 | 0.1328 | 5.00E-06 | 197772 | finn-b-E4_HYPERLIPMIX | rs3903032 | T | A | 0.06495 | || id:finn-b-E4_HYPERLIPMIX | TRUE | reported | igd | 0.000105313 | 20.82994034 |
| 2 | 175575066 | -0.3982 | 0.0893 | 8.16E-06 | 197772 | finn-b-E4_HYPERLIPMIX | rs79962354 | T | C | 0.1544 | || id:finn-b-E4_HYPERLIPMIX | TRUE | reported | igd | 0.000100529 | 19.88360842 |
| 2 | 149128717 | -0.3077 | 0.0686 | 7.28E-06 | 197772 | finn-b-E4_HYPERLIPMIX | rs12478120 | T | A | 0.6956 | || id:finn-b-E4_HYPERLIPMIX | TRUE | reported | igd | 0.000101718 | 20.1188137 |
| 2 | 27741237 | -0.4281 | 0.0665 | 1.24E-10 | 197772 | finn-b-E4_HYPERLIPMIX | rs780094 | C | T | 0.6436 | || id:finn-b-E4_HYPERLIPMIX | TRUE | reported | igd | 0.000209504 | 41.44219722 |
| 3 | 165672158 | 2.794 | 0.6177 | 6.09E-06 | 197772 | finn-b-E4_HYPERLIPMIX | rs183463427 | C | G | 0.003896 | || id:finn-b-E4_HYPERLIPMIX | TRUE | reported | igd | 0.00010344 | 20.45941487 |
| 3 | 149302248 | 0.7705 | 0.1474 | 1.73E-07 | 197772 | finn-b-E4_HYPERLIPMIX | rs76403863 | T | C | 0.0557 | || id:finn-b-E4_HYPERLIPMIX | TRUE | reported | igd | 0.000138142 | 27.32410384 |
| 5 | 91129144 | -0.4889 | 0.1068 | 4.73E-06 | 197772 | finn-b-E4_HYPERLIPMIX | rs76428098 | T | C | 0.103 | || id:finn-b-E4_HYPERLIPMIX | TRUE | reported | igd | 0.000105947 | 20.95526596 |
| 5 | 170008274 | 0.6926 | 0.1533 | 6.28E-06 | 197772 | finn-b-E4_HYPERLIPMIX | rs75348302 | T | A | 0.04933 | || id:finn-b-E4_HYPERLIPMIX | TRUE | reported | igd | 0.000103198 | 20.41156352 |
| 7 | 134444972 | 3.1429 | 0.5906 | 1.03E-07 | 197772 | finn-b-E4_HYPERLIPMIX | rs56783735 | C | T | 0.004483 | || id:finn-b-E4_HYPERLIPMIX | TRUE | reported | igd | 0.000143168 | 28.31847413 |
| 8 | 19816371 | -0.3577 | 0.0754 | 2.11E-06 | 197772 | finn-b-E4_HYPERLIPMIX | rs297 | C | T | 0.2303 | || id:finn-b-E4_HYPERLIPMIX | TRUE | reported | igd | 0.000113784 | 22.50561041 |
| 9 | 101349187 | 1.3301 | 0.2936 | 5.88E-06 | 197772 | finn-b-E4_HYPERLIPMIX | rs79670705 | A | G | 0.01542 | || id:finn-b-E4_HYPERLIPMIX | TRUE | reported | igd | 0.000103764 | 20.52353151 |
| 10 | 80409066 | 0.9019 | 0.2006 | 6.90E-06 | 197772 | finn-b-E4_HYPERLIPMIX | rs116828540 | T | C | 0.02943 | || id:finn-b-E4_HYPERLIPMIX | TRUE | reported | igd | 0.000102199 | 20.21391916 |
| 10 | 65406487 | 0.5272 | 0.1113 | 2.18E-06 | 197772 | finn-b-E4_HYPERLIPMIX | rs75941567 | G | A | 0.09439 | || id:finn-b-E4_HYPERLIPMIX | TRUE | reported | igd | 0.000113435 | 22.43655026 |
| 10 | 95879731 | 1.3394 | 0.3014 | 8.81E-06 | 197772 | finn-b-E4_HYPERLIPMIX | rs77343188 | A | G | 0.0141 | || id:finn-b-E4_HYPERLIPMIX | TRUE | reported | igd | 9.98E-05 | 19.74829933 |
| 11 | 116657561 | -0.4965 | 0.0773 | 1.33E-10 | 197772 | finn-b-E4_HYPERLIPMIX | rs3741298 | T | C | 0.769 | || id:finn-b-E4_HYPERLIPMIX | TRUE | reported | igd | 0.000208557 | 41.25486079 |
| 12 | 99751616 | 3.4832 | 0.7603 | 4.61E-06 | 197772 | finn-b-E4_HYPERLIPMIX | rs147011042 | T | C | 0.003224 | || id:finn-b-E4_HYPERLIPMIX | TRUE | reported | igd | 0.000106115 | 20.98855069 |
| 13 | 111164198 | 0.2848 | 0.0631 | 6.48E-06 | 197772 | finn-b-E4_HYPERLIPMIX | rs2479426 | C | T | 0.5043 | || id:finn-b-E4_HYPERLIPMIX | TRUE | reported | igd | 0.000102994 | 20.37121158 |
| 15 | 35448423 | 1.1334 | 0.2556 | 9.26E-06 | 197772 | finn-b-E4_HYPERLIPMIX | rs16960526 | G | A | 0.01889 | || id:finn-b-E4_HYPERLIPMIX | TRUE | reported | igd | 9.94E-05 | 19.66257199 |
| 17 | 10027955 | -0.2985 | 0.063 | 2.16E-06 | 197772 | finn-b-E4_HYPERLIPMIX | rs12944095 | A | G | 0.4854 | || id:finn-b-E4_HYPERLIPMIX | TRUE | reported | igd | 0.000113499 | 22.44931946 |
| 18 | 62823750 | 0.2866 | 0.0633 | 5.89E-06 | 197772 | finn-b-E4_HYPERLIPMIX | rs1179809 | G | C | 0.4501 | || id:finn-b-E4_HYPERLIPMIX | TRUE | reported | igd | 0.000103642 | 20.49937217 |
| 19 | 53590911 | 0.9524 | 0.2021 | 2.45E-06 | 197772 | finn-b-E4_HYPERLIPMIX | rs184967099 | T | C | 0.03017 | || id:finn-b-E4_HYPERLIPMIX | TRUE | reported | igd | 0.000112277 | 22.20760655 |
| SNP of smoking | 1 | 167137604 | 0.2052 | 0.0401 | 3.16E-07 | 138088 | finn-b-SMOKING | rs4657640 | A | G | 0.4384 | || id:finn-b-SMOKING | TRUE | reported | igd | 0.000189595 | 26.18542804 |
| 1 | 232276199 | 0.9096 | 0.1975 | 4.10E-06 | 138088 | finn-b-SMOKING | rs114143278 | C | A | 0.01196 | || id:finn-b-SMOKING | TRUE | reported | igd | 0.000153583 | 21.21096431 |
| 2 | 140845205 | 0.2268 | 0.0513 | 9.96E-06 | 138088 | finn-b-SMOKING | rs72904537 | T | A | 0.1855 | || id:finn-b-SMOKING | TRUE | reported | igd | 0.000141525 | 19.54542328 |
| 3 | 10304701 | 0.2266 | 0.046 | 8.41E-07 | 138088 | finn-b-SMOKING | rs9851266 | A | C | 0.2538 | || id:finn-b-SMOKING | TRUE | reported | igd | 0.0001757 | 24.26598124 |
| 3 | 192727883 | 0.6201 | 0.1367 | 5.74E-06 | 138088 | finn-b-SMOKING | rs144065048 | A | G | 0.0245 | || id:finn-b-SMOKING | TRUE | reported | igd | 0.000148993 | 20.57690931 |
| 5 | 104363845 | -0.1996 | 0.0445 | 7.27E-06 | 138088 | finn-b-SMOKING | rs10070245 | C | T | 0.283 | || id:finn-b-SMOKING | TRUE | reported | igd | 0.000145674 | 20.11846129 |
| 5 | 81876357 | 1.4362 | 0.3206 | 7.47E-06 | 138088 | finn-b-SMOKING | rs12516774 | A | G | 0.005062 | || id:finn-b-SMOKING | TRUE | reported | igd | 0.000145306 | 20.06765003 |
| 6 | 139629982 | 0.5447 | 0.119 | 4.69E-06 | 138088 | finn-b-SMOKING | rs75961512 | G | A | 0.03006 | || id:finn-b-SMOKING | TRUE | reported | igd | 0.000151705 | 20.95147184 |
| 8 | 135588363 | -0.2669 | 0.0597 | 7.70E-06 | 138088 | finn-b-SMOKING | rs2034015 | T | C | 0.1294 | || id:finn-b-SMOKING | TRUE | reported | igd | 0.00014472 | 19.98675069 |
| 8 | 139316223 | -0.9404 | 0.2122 | 9.31E-06 | 138088 | finn-b-SMOKING | rs1567689 | C | T | 0.9902 | || id:finn-b-SMOKING | TRUE | reported | igd | 0.000142206 | 19.63939892 |
| 9 | 104905420 | 0.7119 | 0.151 | 2.41E-06 | 138088 | finn-b-SMOKING | rs1889631 | A | G | 0.01856 | || id:finn-b-SMOKING | TRUE | reported | igd | 0.000160938 | 22.22684399 |
| 9 | 19055965 | -0.1913 | 0.0416 | 4.32E-06 | 138088 | finn-b-SMOKING | rs1048169 | C | T | 0.343 | || id:finn-b-SMOKING | TRUE | reported | igd | 0.000153116 | 21.14642657 |
| 10 | 33430671 | 0.2212 | 0.0485 | 5.03E-06 | 138088 | finn-b-SMOKING | rs2750049 | G | A | 0.214 | || id:finn-b-SMOKING | TRUE | reported | igd | 0.000150614 | 20.80082106 |
| 10 | 18176543 | 0.4976 | 0.1105 | 6.71E-06 | 138088 | finn-b-SMOKING | rs370103263 | C | T | 0.03517 | || id:finn-b-SMOKING | TRUE | reported | igd | 0.000146831 | 20.27822312 |
| 12 | 84135295 | 0.1902 | 0.0421 | 6.37E-06 | 138088 | finn-b-SMOKING | rs10862739 | A | G | 0.3362 | || id:finn-b-SMOKING | TRUE | reported | igd | 0.000147787 | 20.41035429 |
| 12 | 95718456 | 4.6106 | 1.0206 | 6.25E-06 | 138088 | finn-b-SMOKING | rs143181271 | T | C | 0.0008848 | || id:finn-b-SMOKING | TRUE | reported | igd | 0.000147769 | 20.40786035 |
| 13 | 87471089 | 1.1343 | 0.2357 | 1.49E-06 | 138088 | finn-b-SMOKING | rs140633060 | G | C | 0.008402 | || id:finn-b-SMOKING | TRUE | reported | igd | 0.00016769 | 23.15956559 |
| 14 | 94822701 | 0.5096 | 0.1137 | 7.38E-06 | 138088 | finn-b-SMOKING | rs148674928 | T | C | 0.03471 | || id:finn-b-SMOKING | TRUE | reported | igd | 0.000145452 | 20.087765 |
| 15 | 78915245 | -0.212 | 0.0452 | 2.68E-06 | 138088 | finn-b-SMOKING | rs6495309 | T | C | 0.2602 | || id:finn-b-SMOKING | TRUE | reported | igd | 0.000159283 | 21.99827172 |
| 15 | 35732584 | 0.5127 | 0.1154 | 8.82E-06 | 138088 | finn-b-SMOKING | rs76696306 | A | G | 0.03287 | || id:finn-b-SMOKING | TRUE | reported | igd | 0.000142921 | 19.73825372 |
| 16 | 6332741 | 0.7032 | 0.1246 | 1.67E-08 | 138088 | finn-b-SMOKING | rs74873970 | G | T | 0.02889 | || id:finn-b-SMOKING | TRUE | reported | igd | 0.000230603 | 31.85043362 |
| 16 | 57297464 | 0.2723 | 0.0576 | 2.31E-06 | 138088 | finn-b-SMOKING | rs8046668 | T | C | 0.8581 | || id:finn-b-SMOKING | TRUE | reported | igd | 0.000161817 | 22.34827597 |
| 17 | 12857574 | -0.2231 | 0.0477 | 2.86E-06 | 138088 | finn-b-SMOKING | rs12451713 | A | G | 0.2289 | || id:finn-b-SMOKING | TRUE | reported | igd | 0.000158394 | 21.8754045 |
| 18 | 22074119 | 0.7025 | 0.1478 | 2.00E-06 | 138088 | finn-b-SMOKING | rs117336103 | G | A | 0.0209 | || id:finn-b-SMOKING | TRUE | reported | igd | 0.000163575 | 22.59110629 |
| 21 | 47463363 | 0.1818 | 0.0399 | 5.24E-06 | 138088 | finn-b-SMOKING | rs7283073 | C | T | 0.5448 | || id:finn-b-SMOKING | TRUE | reported | igd | 0.000150321 | 20.76039805 |
| 22 | 34815167 | 0.2158 | 0.0468 | 4.05E-06 | 138088 | finn-b-SMOKING | rs112013795 | T | C | 0.2352 | || id:finn-b-SMOKING | TRUE | reported | igd | 0.000153953 | 21.26203773 |

**Supplementary Table 5.** MR analysis results of cardiovascular risk factors on stable angina pectoris or unstable angina pectoris

| exposure | outcome | method | nsnp | outlier | pval | OR | or_lci95 | or_uci95 | Heterogeneity | | IVW_MRE | | Horizontal Pleiotrophy | | MR-PRESSO |
| --- | --- | --- | --- | --- | --- | --- | --- | --- | --- | --- | --- | --- | --- | --- | --- |
| Q | Q_pval | OR | pval | Egger intercept | Pleiotrophy-pval | pval |
| Hypertension | SAP | MR Egger | 50 | rs189498068 rs10757274 rs10786736 rs12828438 rs4932373 rs7483477 rs2032451 rs35427 | 0.001545108 | 1.405610995 | 1.152268002 | 1.714655154 | 110.081872 | 8.82E-07 |  |  | -0.006431248 | 0.413293766 | <0.000333333333333333 |
| Weighted median | 50 | 1.38E-12 | 1.270682342 | 1.189209463 | 1.357736938 |  |  |  |  |  |  |  |
| Inverse variance weighted | 50 | 5.00E-18 | 1.297697036 | 1.223317987 | 1.376598411 | 111.6438699 | 8.61E-07 | 1.297697036 | 5.0007E-18 |  |  |  |
| Simple mode | 50 | 0.00101937 | 1.250226438 | 1.103017226 | 1.417082264 |  |  |  |  |  |  |  |
| Weighted mode | 50 | 0.000198308 | 1.267063539 | 1.129060183 | 1.421934842 |  |  |  |  |  |  |  |
| Hypertension | UAP | MR Egger | 55 | rs10757274 rs10786736 rs1358350 rs2392929 rs7483477 | 0.000569517 | 1.477405913 | 1.199225477 | 1.820114961 | 69.5516586 | 0.063171081 |  |  | -0.009181404 | 0.272884076 | 0.085333333 |
| Weighted median | 55 | 4.60E-11 | 1.332147318 | 1.223121796 | 1.450891059 |  |  |  |  |  |  |  |
| Inverse variance weighted | 55 | 8.19E-18 | 1.320367024 | 1.239303641 | 1.406732798 | 71.16258582 | 0.058695157 | - | - |  |  |  |
| Simple mode | 55 | 0.006567365 | 1.315217117 | 1.087700708 | 1.590323561 |  |  |  |  |  |  |  |
| Weighted mode | 55 | 0.001045171 | 1.366120882 | 1.14514235 | 1.62974172 |  |  |  |  |  |  |  |
| Hyperlipidemia | SAP | MR Egger | 19 | rs297 rs3741298 | 0.821651077 | 0.998448163 | 0.985260465 | 1.011812379 | 26.92618938 | 0.059159213 |  |  | 0.006056533 | 0.31384109 | 0.107666667 |
| Weighted median | 19 | 0.500725568 | 1.003559032 | 0.993234376 | 1.013991013 |  |  |  |  |  |  |  |
| Inverse variance weighted | 19 | 0.497656006 | 1.003330403 | 0.993735443 | 1.013018006 | 28.63251735 | 0.05305936 | - | - |  |  |  |
| Simple mode | 19 | 0.808806247 | 0.997462961 | 0.977441726 | 1.017894296 |  |  |  |  |  |  |  |
| Weighted mode | 19 | 0.517855198 | 1.003253182 | 0.993617376 | 1.012982434 |  |  |  |  |  |  |  |
| Hyperlipidemia | UAP | MR Egger | 19 | rs297 rs3741298 | 0.591537033 | 1.005883708 | 0.984957312 | 1.027254706 | 25.77045914 | 0.07874529 |  |  | -0.000719523 | 0.934741444 | 0.153333333 |
| Weighted median | 19 | 0.168327314 | 1.012267327 | 0.994858608 | 1.029980675 |  |  |  |  |  |  |  |
| Inverse variance weighted | 19 | 0.479820841 | 1.005253654 | 0.990748092 | 1.019971592 | 25.78092782 | 0.104873483 | - | - |  |  |  |
| Simple mode | 19 | 0.209390664 | 1.024044249 | 0.988059461 | 1.06133959 |  |  |  |  |  |  |  |
| Weighted mode | 19 | 0.111046379 | 1.01332901 | 0.997757632 | 1.029143402 |  |  |  |  |  |  |  |
| Smoking | SAP | MR Egger | 25 |  | 0.363298846 | 1.012420095 | 0.986352975 | 1.039176112 | 36.49326353 | 0.036710525 |  |  | -0.005055784 | 0.321836487 | 0.044666667 |
| Weighted median | 25 | 0.688729434 | 1.004044039 | 0.98441146 | 1.02406816 |  |  |  |  |  |  |  |
| Inverse variance weighted | 25 | 0.787519179 | 1.00243402 | 0.984868454 | 1.020312876 | 38.1198155 | 0.03370535 | 1.00243402 | 0.787519179 |  |  |  |
| Simple mode | 25 | 0.634894867 | 0.99036964 | 0.952074465 | 1.030205158 |  |  |  |  |  |  |  |
| Weighted mode | 25 | 0.84257862 | 1.001965747 | 0.982938398 | 1.02136142 |  |  |  |  |  |  |  |
| Smoking | UAP | MR Egger | 26 |  | 0.08705652 | 1.038508312 | 0.99628168 | 1.082524688 | 35.64419136 | 0.059403468 |  |  | -0.016882128 | 0.034361079 | 0.016666667 |
| Weighted median | 26 | 0.33803479 | 1.016960392 | 0.982565156 | 1.052559653 |  |  |  |  |  |  |  |
| Inverse variance weighted | 26 | 0.915389692 | 1.001570926 | 0.972983185 | 1.030998618 | 43.11946752 | 0.013580185 | 1.001570926 | 0.915389692 |  |  |  |
| Simple mode | 26 | 0.214582004 | 1.041693484 | 0.978217259 | 1.109288661 |  |  |  |  |  |  |  |
| Weighted mode | 26 | 0.230519608 | 1.021733013 | 0.987292899 | 1.057374515 |  |  |  |  |  |  |  |
| Type 2 diabetes | SAP | MR Egger | 52 | rs10965246 rs112694524 rs429358 | 0.020027573 | 1.113545449 | 1.020013966 | 1.21565342 | 84.97972258 | 0.001478598 |  |  | 0.001232731 | 0.791447543 | 0.003 |
| Weighted median | 52 | 1.71E-09 | 1.155180068 | 1.102202707 | 1.210703786 |  |  |  |  |  |  |  |
| Inverse variance weighted | 52 | 8.99E-10 | 1.125539731 | 1.083750444 | 1.168940407 | 85.09984391 | 0.001930637 | 1.125539731 | 8.98542E-10 |  |  |  |
| Simple mode | 52 | 0.00134261 | 1.226638182 | 1.090119338 | 1.380253682 |  |  |  |  |  |  |  |
| Weighted mode | 52 | 0.00034256 | 1.134035265 | 1.063496617 | 1.209252537 |  |  |  |  |  |  |  |
| Type 2 diabetes | UAP | MR Egger | 54 | rs429358 | 0.654044269 | 1.026881889 | 0.915009798 | 1.152431829 | 75.41915644 | 0.018565421 |  |  | 0.011221562 | 0.076565092 | 0.01 |
| Weighted median | 54 | 0.000412268 | 1.138260423 | 1.059333197 | 1.223068241 |  |  |  |  |  |  |  |
| Inverse variance weighted | 54 | 3.75E-06 | 1.129821361 | 1.072860346 | 1.189806587 | 80.1544493 | 0.009401961 | 1.129821361 | 3.75307E-06 |  |  |  |
| Simple mode | 54 | 0.016396164 | 1.206032708 | 1.039992267 | 1.39858241 |  |  |  |  |  |  |  |
| Weighted mode | 54 | 0.001951403 | 1.1663095 | 1.063259924 | 1.279346487 |  |  |  |  |  |  |  |

**Supplementary Table 6**. MR analysis results of sleep traits on cardiovascular risk factors

| exposure | outcome | method | nsnp | outlier | b | se | pval | lo_ci | up_ci | or | or_lci95 | or_uci95 | Heterogeneity | | IVW_MRE | | Horizontal Pleiotrophy | | MR-PRESSO |
| --- | --- | --- | --- | --- | --- | --- | --- | --- | --- | --- | --- | --- | --- | --- | --- | --- | --- | --- | --- |
| Q | Q_pval | OR | pval | Egger intercept | Pleiotrophy-pval | pval |
| Nap during day | Mixed hyperlipidaemia | MR Egger | 49 |  | 5.271372454 | 3.550988142 | 0.144357802 | -1.688564303 | 12.23130921 | 194.6829727 | 0.184784628 | 205111.5408 | 48.35260673 | 0.418058743 |  |  | -0.067766532 | 0.096073489 | 0.343 |
| Weighted median | 49 | -0.178911856 | 1.372192051 | 0.896262643 | -2.868408276 | 2.510584563 | 0.8361796 | 0.056789248 | 12.31212517 |  |  |  |  |  |  |  |
| Inverse variance weighted | 49 | -0.546311439 | 0.953095204 | 0.566511225 | -2.414378038 | 1.32175516 | 0.579081855 | 0.089422939 | 3.749997451 | 51.31964462 | 0.344937037 | - | - |  |  |  |
| Simple mode | 49 | -0.139335673 | 2.951581238 | 0.962544016 | -5.9244349 | 5.645763553 | 0.869935965 | 0.002673318 | 283.0896276 |  |  |  |  |  |  |  |
| Weighted mode | 49 | -0.423276037 | 2.59517534 | 0.871123569 | -5.509819703 | 4.663267628 | 0.654897832 | 0.004046837 | 105.9818262 |  |  |  |  |  |  |  |
| Nap during day | Hypertension | MR Egger | 48 | rs11761181 | 1.385409048 | 0.565840993 | 0.01822151 | 0.276360701 | 2.494457395 | 3.996460314 | 1.318323299 | 12.11515799 | 56.63063589 | 0.135403206 |  |  | -0.010176319 | 0.116526284 | 0.097 |
| Weighted median | 48 | 0.403708398 | 0.207946263 | 0.052208891 | -0.003866277 | 0.811283073 | 1.497367248 | 0.996141187 | 2.250794068 |  |  |  |  |  |  |  |
| Inverse variance weighted | 48 | 0.512621885 | 0.152395401 | 0.000768878 | 0.213926899 | 0.811316872 | 1.669663127 | 1.238532114 | 2.250870143 | 59.78081704 | 0.099899332 | - | - |  |  |  |
| Simple mode | 48 | 0.319033077 | 0.447429489 | 0.479349291 | -0.55792872 | 1.195994875 | 1.375796832 | 0.572393424 | 3.306846034 |  |  |  |  |  |  |  |
| Weighted mode | 48 | 0.3341326 | 0.398022273 | 0.405448694 | -0.445991055 | 1.114256256 | 1.396728338 | 0.640189499 | 3.047300923 |  |  |  |  |  |  |  |
| Nap during day | Smoking | MR Egger | 49 |  | -1.694675541 | 2.214116532 | 0.44786251 | -6.034343944 | 2.644992862 | 0.183658809 | 0.002395067 | 14.08334455 | 45.3894848 | 0.539438892 |  |  | 0.022308068 | 0.374344905 | 0.568 |
| Weighted median | 49 | 0.503628513 | 0.866802426 | 0.561227777 | -1.195304242 | 2.202561268 | 1.654714544 | 0.302611873 | 9.048158602 |  |  |  |  |  |  |  |
| Inverse variance weighted | 49 | 0.22133992 | 0.581945764 | 0.703689644 | -0.919273778 | 1.361953618 | 1.247747493 | 0.39880856 | 3.903812416 | 46.19390984 | 0.547114433 | - | - |  |  |  |
| Simple mode | 49 | 1.265061867 | 1.818261212 | 0.489938223 | -2.298730108 | 4.828853842 | 3.543311944 | 0.100386242 | 125.0675314 |  |  |  |  |  |  |  |
| Weighted mode | 49 | 0.46079668 | 1.667527963 | 0.783477 | -2.807558127 | 3.729151487 | 1.585336487 | 0.060352185 | 41.64375789 |  |  |  |  |  |  |  |
| Nap during day | Type 2 diabetes, definitions combined | MR Egger | 48 | rs174541 | 1.452747953 | 0.761008731 | 0.062515041 | -0.038829161 | 2.944325066 | 4.274845463 | 0.961915028 | 18.99783578 | 72.91132836 | 0.006964358 |  |  | -0.010043265 | 0.247415329 | 0.009 |
| Weighted median | 48 | 0.179620577 | 0.261403664 | 0.491995323 | -0.332730605 | 0.691971759 | 1.196763197 | 0.716963314 | 1.997650537 |  |  |  |  |  |  |  |
| Inverse variance weighted | 48 | 0.593237313 | 0.202979749 | 0.003470744 | 0.195397005 | 0.99107762 | 1.809837953 | 1.215793567 | 2.694136165 | 75.08678093 | 0.00571717 | 0.593237313 | 0.003470744 |  |  |  |
| Simple mode | 48 | -0.167311785 | 0.616781262 | 0.787374365 | -1.376203059 | 1.041579488 | 0.84593582 | 0.252535598 | 2.83368926 |  |  |  |  |  |  |  |
| Weighted mode | 48 | -0.167311785 | 0.518522404 | 0.748376021 | -1.183615697 | 0.848992126 | 0.84593582 | 0.306169718 | 2.33728997 |  |  |  |  |  |  |  |
| Daytime dozing / sleeping (narcolepsy) | Mixed hyperlipidaemia | MR Egger | 18 | rs780093 | -3.056922833 | 12.09254027 | 0.803646406 | -26.75830177 | 20.6444561 | 0.047032199 | 2.39E-12 | 924215751.6 | 25.20360249 | 0.066315616 |  |  | 0.040135958 | 0.699922272 | 0.093 |
| Weighted median | 18 | -0.324037575 | 2.933173294 | 0.912033958 | -6.073057232 | 5.424982082 | 0.723223067 | 0.002304118 | 227.0072788 |  |  |  |  |  |  |  |
| Inverse variance weighted | 18 | 1.580760478 | 2.497536681 | 0.526780771 | -3.314411416 | 6.475932372 | 4.858649302 | 0.036355441 | 649.3243573 | 25.44618345 | 0.085158969 | - | - |  |  |  |
| Simple mode | 18 | -1.424571702 | 4.787609157 | 0.769649189 | -10.80828565 | 7.959142246 | 0.240611495 | 2.02E-05 | 2861.617334 |  |  |  |  |  |  |  |
| Weighted mode | 18 | -1.69419661 | 4.812648325 | 0.729141792 | -11.12698733 | 7.738594106 | 0.18374679 | 1.47E-05 | 2295.243245 |  |  |  |  |  |  |  |
| Daytime dozing / sleeping (narcolepsy) | Hypertension | MR Egger | 19 |  | 3.656897192 | 1.543808211 | 0.029957952 | 0.631033099 | 6.682761285 | 38.74095045 | 1.879551339 | 798.5210145 | 20.57196619 | 0.246023426 |  |  | -0.025086825 | 0.070704924 | 0.122 |
| Weighted median | 19 | 0.415456376 | 0.432841947 | 0.337138815 | -0.432913839 | 1.263826592 | 1.515062022 | 0.648616375 | 3.538937682 |  |  |  |  |  |  |  |
| Inverse variance weighted | 19 | 0.743769687 | 0.340611554 | 0.02898943 | 0.076171041 | 1.411368333 | 2.103851446 | 1.079147137 | 4.101563871 | 25.07107063 | 0.12297102 | - | - |  |  |  |
| Simple mode | 19 | -0.559014076 | 0.888681386 | 0.537226501 | -2.300829592 | 1.182801441 | 0.571772511 | 0.100175704 | 3.263503921 |  |  |  |  |  |  |  |
| Weighted mode | 19 | -0.318264675 | 0.799645187 | 0.695305707 | -1.885569241 | 1.249039891 | 0.727410235 | 0.151742657 | 3.486993456 |  |  |  |  |  |  |  |
| Daytime dozing / sleeping (narcolepsy) | Smoking | MR Egger | 19 |  | -3.230891396 | 6.089226779 | 0.602565028 | -15.16577588 | 8.703993091 | 0.039522253 | 2.59E-07 | 6026.930316 | 12.08439891 | 0.794999783 |  |  | 0.038808043 | 0.459943155 | 0.814 |
| Weighted median | 19 | 0.61475128 | 1.682187592 | 0.714777376 | -2.682336401 | 3.911838961 | 1.84919661 | 0.06840315 | 49.99079863 |  |  |  |  |  |  |  |
| Inverse variance weighted | 19 | 1.274631437 | 1.252827962 | 0.308961562 | -1.180911368 | 3.730174242 | 3.577382677 | 0.306998822 | 41.68637106 | 12.65607584 | 0.811585919 | - | - |  |  |  |
| Simple mode | 19 | 0.332438242 | 3.008666442 | 0.913240626 | -5.564547984 | 6.229424468 | 1.394363783 | 0.003831312 | 507.4633379 |  |  |  |  |  |  |  |
| Weighted mode | 19 | 0.208359453 | 2.808697987 | 0.941682461 | -5.296688602 | 5.713407508 | 1.231655813 | 0.00500815 | 302.901451 |  |  |  |  |  |  |  |
| Daytime dozing / sleeping (narcolepsy) | Type 2 diabetes, definitions combined | MR Egger | 17 | rs780093 rs12140153 | -3.513246087 | 2.694065661 | 0.211867769 | -8.793614782 | 1.767122608 | 0.029800024 | 0.000151699 | 5.853984898 | 17.14353873 | 0.310356333 |  |  | 0.032572348 | 0.15873506 | 0.251 |
| Weighted median | 17 | 0.311146918 | 0.52694706 | 0.554874973 | -0.721669319 | 1.343963155 | 1.364989748 | 0.485940389 | 3.834208999 |  |  |  |  |  |  |  |
| Inverse variance weighted | 17 | 0.439203553 | 0.410119977 | 0.28420774 | -0.364631602 | 1.243038708 | 1.551471062 | 0.694452439 | 3.466130036 | 19.65768378 | 0.236035609 | - | - |  |  |  |
| Simple mode | 17 | 0.299921641 | 1.037702943 | 0.776273848 | -1.733976128 | 2.333819409 | 1.349753038 | 0.176580904 | 10.31727226 |  |  |  |  |  |  |  |
| Weighted mode | 17 | 0.055496171 | 0.92888034 | 0.953098425 | -1.765109296 | 1.876101638 | 1.057064969 | 0.171168077 | 6.528006659 |  |  |  |  |  |  |  |
| Snoring | Mixed hyperlipidaemia | MR Egger | 41 |  | 13.4371769 | 9.49951108 | 0.165146063 | -5.18186482 | 32.05621861 | 685001.9041 | 0.005617521 | 8.35293E+13 | 53.82944108 | 0.057373192 |  |  | -0.096783065 | 0.163984435 | 0.04 |
| Weighted median | 41 | -3.14062837 | 2.282026744 | 0.16874573 | -7.613400789 | 1.332144049 | 0.043255609 | 0.00049379 | 3.789158826 |  |  |  |  |  |  |  |
| Inverse variance weighted | 41 | 0.207553512 | 1.827805888 | 0.909591856 | -3.374946029 | 3.790053052 | 1.23066357 | 0.034219965 | 44.25874824 | 56.60671936 | 0.042661201 | 0.207553512 | 0.909591856 |  |  |  |
| Simple mode | 41 | -5.599370842 | 5.148739892 | 0.283315715 | -15.69090103 | 4.492159347 | 0.003700191 | 1.53E-07 | 89.3140979 |  |  |  |  |  |  |  |
| Weighted mode | 41 | -5.905071542 | 4.854150777 | 0.230924479 | -15.41920707 | 3.609063982 | 0.002725587 | 2.01E-07 | 36.9314681 |  |  |  |  |  |  |  |
| Snoring | Hypertension | MR Egger | 40 | rs34811474 | 2.835286013 | 1.255662982 | 0.029771151 | 0.374186567 | 5.296385458 | 17.03527191 | 1.453808358 | 199.6139913 | 43.11358436 | 0.261771183 |  |  | -0.022273021 | 0.017931709 | 0.114 |
| Weighted median | 40 | 0.384539786 | 0.33651002 | 0.253151091 | -0.275019853 | 1.044099426 | 1.468938141 | 0.759557043 | 2.840838985 |  |  |  |  |  |  |  |
| Inverse variance weighted | 40 | -0.213772094 | 0.256344523 | 0.404323276 | -0.716207359 | 0.288663172 | 0.807532406 | 0.488601838 | 1.334642107 | 50.05930055 | 0.110439751 | - | - |  |  |  |
| Simple mode | 40 | 0.80080052 | 0.897610783 | 0.377786013 | -0.958516615 | 2.560117655 | 2.227323232 | 0.383461285 | 12.93733937 |  |  |  |  |  |  |  |
| Weighted mode | 40 | 0.84191209 | 0.72206312 | 0.250703242 | -0.573331624 | 2.257155805 | 2.320800317 | 0.563644456 | 9.555871717 |  |  |  |  |  |  |  |
| Snoring | Smoking | MR Egger | 41 |  | 1.360842556 | 5.257898752 | 0.797136305 | -8.944638997 | 11.66632411 | 3.899477447 | 0.000130435 | 116578.9622 | 41.21255098 | 0.374043561 |  |  | -0.0185258 | 0.6263709 | 0.428 |
| Weighted median | 41 | -0.075277174 | 1.407201095 | 0.957338108 | -2.833391321 | 2.682836973 | 0.927486375 | 0.058813061 | 14.62652955 |  |  |  |  |  |  |  |
| Inverse variance weighted | 41 | -1.172502083 | 0.987775771 | 0.235222732 | -3.108542595 | 0.763538429 | 0.309591348 | 0.044666004 | 2.145855761 | 41.46702369 | 0.406540164 | - | - |  |  |  |
| Simple mode | 41 | 1.257101203 | 3.26384844 | 0.702160041 | -5.14004174 | 7.654244147 | 3.515216805 | 0.005857445 | 2109.579983 |  |  |  |  |  |  |  |
| Weighted mode | 41 | 1.171802361 | 2.930580971 | 0.691391904 | -4.572136342 | 6.915741065 | 3.22780507 | 0.010335855 | 1008.017757 |  |  |  |  |  |  |  |
| Snoring | Type 2 diabetes, definitions combined | MR Egger | 38 | rs12603115 rs34811474 rs73030263 | 2.66692141 | 1.941912776 | 0.178137618 | -1.139227631 | 6.47307045 | 14.3955828 | 0.320066136 | 647.4686986 | 63.18701485 | 0.003385561 |  |  | -0.024056893 | 0.091893751 | 0.001 |
| Weighted median | 38 | -0.048408442 | 0.412073564 | 0.906483461 | -0.856072628 | 0.759255743 | 0.952744567 | 0.424827265 | 2.136685386 |  |  |  |  |  |  |  |
| Inverse variance weighted | 38 | -0.636338038 | 0.373391365 | 0.088341492 | -1.368185113 | 0.095509037 | 0.529226889 | 0.254568554 | 1.100218765 | 68.45031999 | 0.001260626 | -0.636338038 | 0.088341492 |  |  |  |
| Simple mode | 38 | 0.433745634 | 0.974371404 | 0.658801805 | -1.476022318 | 2.343513586 | 1.543026325 | 0.228544962 | 10.41777609 |  |  |  |  |  |  |  |
| Weighted mode | 38 | 0.187873768 | 0.859713549 | 0.828216586 | -1.497164789 | 1.872912325 | 1.206681184 | 0.223763679 | 6.507219967 |  |  |  |  |  |  |  |
| Getting up in morning | Mixed hyperlipidaemia | MR Egger | 75 |  | 5.857439345 | 3.121853588 | 0.06461572 | -0.261393687 | 11.97627238 | 349.8272092 | 0.769977729 | 158938.4622 | 91.80316132 | 0.067623407 |  |  | -0.068111977 | 0.081954941 | 0.038 |
| Weighted median | 75 | 1.086001312 | 1.018611811 | 0.286352144 | -0.910477837 | 3.082480461 | 2.962404626 | 0.402331929 | 21.81244026 |  |  |  |  |  |  |  |
| Inverse variance weighted | 75 | 0.535440115 | 0.812127544 | 0.509699644 | -1.056329872 | 2.127210101 | 1.708199881 | 0.347729684 | 8.391422901 | 95.71533595 | 0.045620595 | 0.535440115 | 0.509699644 |  |  |  |
| Simple mode | 75 | 3.040696081 | 2.4697422 | 0.222154356 | -1.799998631 | 7.881390794 | 20.91980005 | 0.165299114 | 2647.5522 |  |  |  |  |  |  |  |
| Weighted mode | 75 | 1.746224844 | 2.425956491 | 0.473910073 | -3.008649879 | 6.501099567 | 5.732919107 | 0.049358273 | 665.873403 |  |  |  |  |  |  |  |
| Getting up in morning | Hypertension | MR Egger | 72 | rs10779704 rs1421085 rs3766163 | -0.241314289 | 0.496742689 | 0.628630905 | -1.21492996 | 0.732301382 | 0.785594684 | 0.296730797 | 2.07986166 | 102.9944292 | 0.006277768 |  |  | 0.0015917 | 0.797971519 | 0.003 |
| Weighted median | 72 | -0.189390747 | 0.164362468 | 0.249208125 | -0.511541183 | 0.13275969 | 0.827463115 | 0.599570818 | 1.141975537 |  |  |  |  |  |  |  |
| Inverse variance weighted | 72 | -0.118003085 | 0.127391897 | 0.354290216 | -0.367691203 | 0.131685033 | 0.888693311 | 0.692330938 | 1.140748965 | 103.0915722 | 0.007690049 | -0.118003085 | 0.354290216 |  |  |  |
| Simple mode | 72 | -0.704576599 | 0.464716745 | 0.13392329 | -1.615421419 | 0.206268221 | 0.494317825 | 0.198806872 | 1.229082826 |  |  |  |  |  |  |  |
| Weighted mode | 72 | -0.629274688 | 0.446569109 | 0.163161068 | -1.504550141 | 0.246000765 | 0.532978236 | 0.222117193 | 1.278900552 |  |  |  |  |  |  |  |
| Getting up in morning | Smoking | MR Egger | 75 |  | 3.882912585 | 1.775011392 | 0.031905629 | 0.403890256 | 7.361934914 | 48.56546031 | 1.497639581 | 1574.880876 | 73.8551161 | 0.450003859 |  |  | -0.044695946 | 0.04528502 | 0.339 |
| Weighted median | 75 | 0.587528135 | 0.659465615 | 0.372974507 | -0.70502447 | 1.880080741 | 1.799534707 | 0.494096483 | 6.554034019 |  |  |  |  |  |  |  |
| Inverse variance weighted | 75 | 0.387146224 | 0.462649968 | 0.402704109 | -0.519647712 | 1.293940161 | 1.472771831 | 0.594730027 | 3.647128557 | 78.05274988 | 0.351294013 | - | - |  |  |  |
| Simple mode | 75 | 1.869504248 | 1.503690649 | 0.217690349 | -1.077729424 | 4.816737921 | 6.485080613 | 0.340367479 | 123.5613657 |  |  |  |  |  |  |  |
| Weighted mode | 75 | 1.80832911 | 1.384855634 | 0.195669224 | -0.905987934 | 4.522646153 | 6.10024607 | 0.404142422 | 92.07893084 |  |  |  |  |  |  |  |
| Getting up in morning | Type 2 diabetes, definitions combined | MR Egger | 71 | rs112613078 rs1421085 rs3760185 rs77641763 | -0.026623904 | 0.544522931 | 0.961145026 | -1.093888849 | 1.040641041 | 0.973727388 | 0.334911538 | 2.831031241 | 83.62241192 | 0.110824825 |  |  | -0.000930438 | 0.889923141 | 0.095 |
| Weighted median | 71 | -0.04083298 | 0.193529238 | 0.832894082 | -0.420150286 | 0.338484326 | 0.959989454 | 0.656948082 | 1.402819761 |  |  |  |  |  |  |  |
| Inverse variance weighted | 71 | -0.099722447 | 0.139021853 | 0.473179814 | -0.372205279 | 0.172760385 | 0.905088593 | 0.689212747 | 1.188581269 | 83.64579827 | 0.126856886 | - | - |  |  |  |
| Simple mode | 71 | 0.153358581 | 0.465427224 | 0.742761228 | -0.758878778 | 1.065595941 | 1.165742918 | 0.468191079 | 2.902568227 |  |  |  |  |  |  |  |
| Weighted mode | 71 | 0.096715073 | 0.430184258 | 0.822772412 | -0.746446073 | 0.93987622 | 1.101546469 | 0.474048296 | 2.559664563 |  |  |  |  |  |  |  |
| Sleeplessness / insomnia | Mixed hyperlipidaemia | MR Egger | 39 |  | -1.442400732 | 3.422526904 | 0.67586988 | -8.150553465 | 5.265752 | 0.236359641 | 0.000288576 | 193.5918352 | 51.13980213 | 0.060960391 |  |  | 0.02916549 | 0.466456315 | 0.066 |
| Weighted median | 39 | -1.747017619 | 1.606628357 | 0.276868335 | -4.896009199 | 1.401973961 | 0.174292977 | 0.00747636 | 4.063212678 |  |  |  |  |  |  |  |
| Inverse variance weighted | 39 | 0.925858042 | 1.157361427 | 0.423726366 | -1.342570355 | 3.194286439 | 2.524033059 | 0.261173497 | 24.39276176 | 51.88822356 | 0.065955358 | - | - |  |  |  |
| Simple mode | 39 | -4.009750215 | 3.602565659 | 0.272688614 | -11.07077891 | 3.051278476 | 0.018137925 | 1.56E-05 | 21.14235715 |  |  |  |  |  |  |  |
| Weighted mode | 39 | -2.725701985 | 2.319355597 | 0.247226815 | -7.271638955 | 1.820234985 | 0.065500206 | 0.000694972 | 6.173308912 |  |  |  |  |  |  |  |
| Sleeplessness / insomnia | Hypertension | MR Egger | 35 | rs2297787 rs56093896 rs68094047 rs9894577 | -0.666839685 | 0.584392512 | 0.262049234 | -1.812249009 | 0.47856964 | 0.513328296 | 0.163286491 | 1.613764486 | 60.53167494 | 0.002413379 |  |  | 0.009189261 | 0.178662466 | 0.001 |
| Weighted median | 35 | -0.007637927 | 0.257447939 | 0.976331951 | -0.512235888 | 0.496960033 | 0.992391167 | 0.599154438 | 1.643716824 |  |  |  |  |  |  |  |
| Inverse variance weighted | 35 | 0.084773182 | 0.20842591 | 0.684205912 | -0.323741602 | 0.493287966 | 1.088470154 | 0.723437153 | 1.637692053 | 63.99525875 | 0.001393403 | 0.084773182 | 0.684205912 |  |  |  |
| Simple mode | 35 | 0.665824908 | 0.555502729 | 0.238971863 | -0.422960441 | 1.754610257 | 1.946095208 | 0.655104548 | 5.781194121 |  |  |  |  |  |  |  |
| Weighted mode | 35 | 0.020393931 | 0.342220809 | 0.952828774 | -0.650358854 | 0.691146715 | 1.020603308 | 0.521858472 | 1.996003069 |  |  |  |  |  |  |  |
| Sleeplessness / insomnia | Smoking | MR Egger | 39 |  | 0.773784312 | 2.148711592 | 0.720808357 | -3.437690408 | 4.985259032 | 2.167954968 | 0.032138827 | 146.2414514 | 51.61563206 | 0.055774612 |  |  | -0.01154265 | 0.646037551 | 0.068 |
| Weighted median | 39 | 0.403329766 | 1.039650447 | 0.698054904 | -1.634385109 | 2.441044641 | 1.496800404 | 0.195072283 | 11.48503222 |  |  |  |  |  |  |  |
| Inverse variance weighted | 39 | -0.160920738 | 0.72879856 | 0.825246009 | -1.589365917 | 1.26752444 | 0.851359549 | 0.204054959 | 3.552048361 | 51.91475073 | 0.065638582 | - | - |  |  |  |
| Simple mode | 39 | 0.339835463 | 2.028695942 | 0.86785376 | -3.636408584 | 4.316079509 | 1.404716444 | 0.026346797 | 74.89442906 |  |  |  |  |  |  |  |
| Weighted mode | 39 | 0.407922574 | 1.357049449 | 0.765361688 | -2.251894346 | 3.067739495 | 1.503690732 | 0.105199751 | 21.49326209 |  |  |  |  |  |  |  |
| Sleeplessness / insomnia | Type 2 diabetes, definitions combined | MR Egger | 38 | rs9894577 | 0.065525423 | 0.622325324 | 0.916729181 | -1.154232212 | 1.285283057 | 1.067719881 | 0.315299527 | 3.615691261 | 55.35596007 | 0.020577769 |  |  | 0.003677801 | 0.611542532 | 0.046 |
| Weighted median | 38 | 0.369726193 | 0.290126412 | 0.202535008 | -0.198921574 | 0.938373961 | 1.44733827 | 0.81961417 | 2.555822171 |  |  |  |  |  |  |  |
| Inverse variance weighted | 38 | 0.36462101 | 0.213444751 | 0.087586477 | -0.053730703 | 0.782972722 | 1.439968171 | 0.947687282 | 2.187966825 | 55.75958479 | 0.024528521 | 0.36462101 | 0.087586477 |  |  |  |
| Simple mode | 38 | 0.773034674 | 0.516664174 | 0.1430827 | -0.239627108 | 1.785696456 | 2.166330395 | 0.786921243 | 5.963731977 |  |  |  |  |  |  |  |
| Weighted mode | 38 | 0.526591163 | 0.364945084 | 0.157452628 | -0.188701201 | 1.241883527 | 1.693150785 | 0.828033885 | 3.462128338 |  |  |  |  |  |  |  |
| Sleep duration | Mixed hyperlipidaemia | MR Egger | 69 |  | 2.400627772 | 2.941663131 | 0.417347275 | -3.365031966 | 8.166287509 | 11.03009859 | 0.034560911 | 3520.250776 | 65.26799901 | 0.537117533 |  |  | -0.023390995 | 0.497319883 | 0.572 |
| Weighted median | 69 | 0.462132186 | 1.190872319 | 0.697970219 | -1.871977559 | 2.796241932 | 1.587455129 | 0.153819174 | 16.38296264 |  |  |  |  |  |  |  |
| Inverse variance weighted | 69 | 0.458598947 | 0.745020132 | 0.538189961 | -1.001640513 | 1.918838406 | 1.581856167 | 0.367276425 | 6.813039885 | 65.73370952 | 0.555341563 | - | - |  |  |  |
| Simple mode | 69 | 0.509933895 | 2.378794201 | 0.830902765 | -4.152502739 | 5.172370528 | 1.665181114 | 0.015725012 | 176.3323433 |  |  |  |  |  |  |  |
| Weighted mode | 69 | 0.425577117 | 1.87571641 | 0.821191718 | -3.250827045 | 4.10198128 | 1.530473428 | 0.038742153 | 60.45995711 |  |  |  |  |  |  |  |
| Sleep duration | Hypertension | MR Egger | 64 | rs1463053 rs2863957 rs62444917 rs8047587 rs9903898 | 0.909086082 | 0.836019751 | 0.281070331 | -0.72951263 | 2.547684794 | 2.482053103 | 0.482143915 | 12.77748699 | 120.1052509 | 1.38E-05 |  |  | -0.009285831 | 0.328835973 | <0.001 |
| Weighted median | 64 | 0.170258638 | 0.190534401 | 0.371544101 | -0.203188788 | 0.543706064 | 1.185611456 | 0.816124152 | 1.722378293 |  |  |  |  |  |  |  |
| Inverse variance weighted | 64 | 0.101965884 | 0.16250237 | 0.530349093 | -0.216538762 | 0.42047053 | 1.107345693 | 0.805301319 | 1.522677852 | 121.9817516 | 1.21E-05 | 0.101965884 | 0.530349093 |  |  |  |
| Simple mode | 64 | 0.165192407 | 0.431736004 | 0.703286696 | -0.681010161 | 1.011394976 | 1.179620065 | 0.506105486 | 2.749433735 |  |  |  |  |  |  |  |
| Weighted mode | 64 | 0.087442294 | 0.381730424 | 0.81955793 | -0.660749337 | 0.835633926 | 1.091379284 | 0.516464184 | 2.306275594 |  |  |  |  |  |  |  |
| Sleep duration | Smoking | MR Egger | 69 |  | 1.129262447 | 2.013020352 | 0.576683151 | -2.816257443 | 5.074782337 | 3.093374131 | 0.059829439 | 159.9373758 | 78.25829033 | 0.163605641 |  |  | -0.012791529 | 0.587174884 | 0.187 |
| Weighted median | 69 | -0.193678336 | 0.713929219 | 0.786171791 | -1.592979606 | 1.205622934 | 0.823922888 | 0.203318898 | 3.338838307 |  |  |  |  |  |  |  |
| Inverse variance weighted | 69 | 0.066622759 | 0.50574713 | 0.895196777 | -0.924641615 | 1.057887133 | 1.068892172 | 0.396673556 | 2.88027891 | 78.60594898 | 0.178119909 | - | - |  |  |  |
| Simple mode | 69 | -1.271573424 | 1.754886361 | 0.471189365 | -4.711150691 | 2.168003843 | 0.280390102 | 0.008994422 | 8.740818567 |  |  |  |  |  |  |  |
| Weighted mode | 69 | -0.20098809 | 1.299174836 | 0.877512615 | -2.747370769 | 2.34539459 | 0.817922173 | 0.064096163 | 10.4373904 |  |  |  |  |  |  |  |
| Sleep duration | Type 2 diabetes, definitions combined | MR Egger | 66 | rs13107325 rs6889592 rs8047587 | 0.024897894 | 0.649853734 | 0.969557329 | -1.248815425 | 1.298611212 | 1.025210435 | 0.286844384 | 3.66420433 | 102.5856639 | 0.001573926 |  |  | -0.00153606 | 0.839677373 | 0.005 |
| Weighted median | 66 | -0.098769193 | 0.201674107 | 0.624313274 | -0.494050443 | 0.296512056 | 0.905951784 | 0.610150005 | 1.345158777 |  |  |  |  |  |  |  |
| Inverse variance weighted | 66 | -0.102737231 | 0.16459944 | 0.532519143 | -0.425352134 | 0.219877671 | 0.902364055 | 0.653539611 | 1.245924309 | 102.6518029 | 0.002016144 | -0.102737231 | 0.532519143 |  |  |  |
| Simple mode | 66 | -0.162062917 | 0.497028037 | 0.745423449 | -1.13623787 | 0.812112037 | 0.850387699 | 0.321024489 | 2.252660668 |  |  |  |  |  |  |  |
| Weighted mode | 66 | -0.265097609 | 0.360815017 | 0.465153194 | -0.972295042 | 0.442099825 | 0.767131068 | 0.378214024 | 1.555971057 |  |  |  |  |  |  |  |
| Morning/evening person (chronotype) | Mixed hyperlipidaemia | MR Egger | 150 |  | -1.097824397 | 1.155535279 | 0.343632134 | -3.362673543 | 1.16702475 | 0.333596067 | 0.034642517 | 3.212420651 | 127.4855961 | 0.887468173 |  |  | 0.01667271 | 0.375815879 | 0.903 |
| Weighted median | 150 | -0.198890513 | 0.542749633 | 0.714029439 | -1.262679794 | 0.864898767 | 0.819639628 | 0.28289491 | 2.37476567 |  |  |  |  |  |  |  |
| Inverse variance weighted | 150 | -0.125798622 | 0.371342021 | 0.734784857 | -0.853628983 | 0.602031738 | 0.881792402 | 0.425866662 | 1.825824632 | 128.2746893 | 0.889175876 | - | - |  |  |  |
| Simple mode | 150 | -0.30764437 | 1.471536679 | 0.834684343 | -3.19185626 | 2.57656752 | 0.735176723 | 0.041095516 | 13.15191691 |  |  |  |  |  |  |  |
| Weighted mode | 150 | 0.023607895 | 1.191813535 | 0.984222734 | -2.312346634 | 2.359562424 | 1.023888767 | 0.099028595 | 10.58631812 |  |  |  |  |  |  |  |
| Morning/evening person (chronotype) | Hypertension | MR Egger | 148 | rs10988239 rs1421085 | -0.270943223 | 0.216278399 | 0.212298728 | -0.694848885 | 0.152962439 | 0.762659797 | 0.499149871 | 1.165281209 | 237.902603 | 2.35E-06 |  |  | 0.002523616 | 0.473071558 | <0.001 |
| Weighted median | 148 | -0.196658314 | 0.084436196 | 0.019855042 | -0.362153257 | -0.03116337 | 0.821471271 | 0.696175666 | 0.969317203 |  |  |  |  |  |  |  |
| Inverse variance weighted | 148 | -0.123651734 | 0.069540877 | 0.075384833 | -0.259951852 | 0.012648384 | 0.883687546 | 0.771088711 | 1.012728714 | 238.7458094 | 2.56E-06 | -0.123651734 | 0.075384833 |  |  |  |
| Simple mode | 148 | -0.340477891 | 0.248159848 | 0.172150357 | -0.826871193 | 0.14591541 | 0.711430255 | 0.437415737 | 1.157098305 |  |  |  |  |  |  |  |
| Weighted mode | 148 | -0.30404225 | 0.213442211 | 0.156429622 | -0.722388984 | 0.114304484 | 0.737829692 | 0.4855908 | 1.121093428 |  |  |  |  |  |  |  |
| Morning/evening person (chronotype) | Smoking | MR Egger | 150 |  | 0.365455243 | 0.731147936 | 0.617931742 | -1.067594711 | 1.798505197 | 1.441169941 | 0.343834545 | 6.040611187 | 139.6087326 | 0.676638673 |  |  | -0.003689273 | 0.756443047 | 0.71 |
| Weighted median | 150 | -0.014631887 | 0.355828793 | 0.967199767 | -0.71205632 | 0.682792547 | 0.985474639 | 0.490634258 | 1.979397582 |  |  |  |  |  |  |  |
| Inverse variance weighted | 150 | 0.150247007 | 0.234302463 | 0.521358738 | -0.308985821 | 0.609479835 | 1.162121259 | 0.73419118 | 1.839474319 | 139.7052858 | 0.6953995 | - | - |  |  |  |
| Simple mode | 150 | -0.600958734 | 1.000384025 | 0.548933838 | -2.561711423 | 1.359793956 | 0.548285724 | 0.077172552 | 3.895390598 |  |  |  |  |  |  |  |
| Weighted mode | 150 | -0.689231926 | 0.861462821 | 0.424943067 | -2.377699055 | 0.999235204 | 0.501961465 | 0.092763776 | 2.716203691 |  |  |  |  |  |  |  |
| Morning/evening person (chronotype) | Type 2 diabetes, definitions combined | MR Egger | 146 | rs112555644 rs1421085 rs28458909 rs4237555 | 0.096178856 | 0.237593541 | 0.68622215 | -0.369504484 | 0.561862197 | 1.100955959 | 0.691076685 | 1.753935635 | 188.7378982 | 0.007295383 |  |  | -0.001047798 | 0.784135107 | 0.011 |
| Weighted median | 146 | 0.137832613 | 0.098368198 | 0.161157029 | -0.054969056 | 0.330634282 | 1.147783411 | 0.946514437 | 1.391850675 |  |  |  |  |  |  |  |
| Inverse variance weighted | 146 | 0.034305201 | 0.074749616 | 0.646280979 | -0.112204046 | 0.180814447 | 1.034900411 | 0.89386185 | 1.198192831 | 188.8366195 | 0.008402747 | 0.034305201 | 0.646280979 |  |  |  |
| Simple mode | 146 | 0.159125058 | 0.263031608 | 0.546147478 | -0.356416893 | 0.674667009 | 1.172484566 | 0.700180659 | 1.96337908 |  |  |  |  |  |  |  |
| Weighted mode | 146 | 0.21301641 | 0.198908028 | 0.285980611 | -0.176843325 | 0.602876146 | 1.237404957 | 0.837911054 | 1.827367024 |  |  |  |  |  |  |  |

**Supplementary Table 7.** MR analysis results of cardiovascular risk factors on sleep traits

| exposure | outcome | method | nsnp | outlier | b | se | pval | lo_ci | up_ci | or | or_lci95 | or_uci95 | Heterogeneity | | IVW_MRE | | Horizontal Pleiotrophy | | MR-PRESSO |
| --- | --- | --- | --- | --- | --- | --- | --- | --- | --- | --- | --- | --- | --- | --- | --- | --- | --- | --- | --- |
| Q | Q_pval | OR | pval | Egger intercept | Pleiotrophy-pval | pval |
| Type 2 diabetes | Nap during day | MR Egger | 49 | rs429358 rs76177300 rs9940128 | 0.001388532 | 0.007287702 | 0.849713801 | -0.012895364 | 0.015672428 | 1.001389496 | 0.987187425 | 1.015795884 | 97.73495395 | 2.03E-05 |  |  | 0.001034181 | 0.192283129 | <0.000333333333333333 |
| Weighted median | 49 | 0.00324202 | 0.003803472 | 0.394000781 | -0.004212785 | 0.010696824 | 1.003247281 | 0.995796077 | 1.01075424 |  |  |  |  |  |  |  |
| Inverse variance weighted | 49 | 0.009843631 | 0.003528504 | 0.005274939 | 0.002927763 | 0.0167595 | 1.009892239 | 1.002932053 | 1.016900728 | 101.3739232 | 1.09E-05 | 0.009843631 | 0.005274939 |  |  |  |
| Simple mode | 49 | 0.004098277 | 0.010060253 | 0.685545114 | -0.015619819 | 0.023816373 | 1.004106686 | 0.984501537 | 1.024102247 |  |  |  |  |  |  |  |
| Weighted mode | 49 | 0.00110585 | 0.004491126 | 0.806554099 | -0.007696756 | 0.009908456 | 1.001106462 | 0.992332788 | 1.009957708 |  |  |  |  |  |  |  |
| Hypertension | Nap during day | MR Egger | 55 | rs28567725 | 0.014334835 | 0.015120992 | 0.34742761 | -0.01530231 | 0.043971979 | 1.014438071 | 0.984814176 | 1.044953074 | 99.42402665 | 0.000117588 |  |  | -0.000207503 | 0.859677967 | 0.000333333 |
| Weighted median | 55 | 0.015915912 | 0.005139326 | 0.001955646 | 0.005842832 | 0.025988991 | 1.016043244 | 1.005859935 | 1.02632965 |  |  |  |  |  |  |  |
| Inverse variance weighted | 55 | 0.011761738 | 0.004302223 | 0.006259386 | 0.003329381 | 0.020194094 | 1.011831179 | 1.00333493 | 1.020399374 | 99.48322749 | 0.000162474 | 0.011761738 | 0.006259386 |  |  |  |
| Simple mode | 55 | 0.014884463 | 0.01138096 | 0.196468413 | -0.007422219 | 0.037191145 | 1.014995788 | 0.992605258 | 1.037891389 |  |  |  |  |  |  |  |
| Weighted mode | 55 | 0.016149182 | 0.008525579 | 0.063558973 | -0.000560953 | 0.032859318 | 1.016280285 | 0.999439205 | 1.033405147 |  |  |  |  |  |  |  |
| Type 2 diabetes | Day time dozing/sleeping (nacrolepsy) | MR Egger | 52 |  | 0.00441931 | 0.005417874 | 0.418545945 | -0.006199724 | 0.015038344 | 1.00442909 | 0.993819455 | 1.015151989 | 83.55525466 | 0.002046352 |  |  | 0.000172075 | 0.768716205 | 0.003 |
| Weighted median | 52 | 0.003079047 | 0.003524404 | 0.382316514 | -0.003828786 | 0.009986879 | 1.003083792 | 0.996178534 | 1.010036915 |  |  |  |  |  |  |  |
| Inverse variance weighted | 52 | 0.005833414 | 0.002522141 | 0.020729153 | 0.000890017 | 0.01077681 | 1.005850461 | 1.000890413 | 1.010835089 | 83.70133138 | 0.002637671 | 0.005833414 | 0.020729153 |  |  |  |
| Simple mode | 52 | -0.001934964 | 0.006976919 | 0.782641767 | -0.015609726 | 0.011739798 | 0.998066907 | 0.984511475 | 1.011808979 |  |  |  |  |  |  |  |
| Weighted mode | 52 | 0.001613696 | 0.003800556 | 0.672918138 | -0.005835395 | 0.009062786 | 1.001614998 | 0.994181598 | 1.009103977 |  |  |  |  |  |  |  |
| Hypertension | Day time dozing/sleeping (nacrolepsy) | MR Egger | 56 |  | 0.014114124 | 0.013092376 | 0.285807515 | -0.011546934 | 0.039775181 | 1.014214198 | 0.988519476 | 1.040576807 | 110.0218965 | 1.05E-05 |  |  | -0.000793314 | 0.433965528 | <0.000333333333333333 |
| Weighted median | 56 | 0.001968356 | 0.00426398 | 0.644350863 | -0.006389045 | 0.010325757 | 1.001970295 | 0.993631322 | 1.010379252 |  |  |  |  |  |  |  |
| Inverse variance weighted | 56 | 0.004223732 | 0.003728489 | 0.257287137 | -0.003084108 | 0.011531571 | 1.004232664 | 0.996920643 | 1.011598316 | 111.288013 | 1.09E-05 | 0.004223732 | 0.257287137 |  |  |  |
| Simple mode | 56 | -0.000238246 | 0.009876692 | 0.980842573 | -0.019596563 | 0.019120071 | 0.999761782 | 0.980594202 | 1.01930403 |  |  |  |  |  |  |  |
| Weighted mode | 56 | 0.001021192 | 0.008049796 | 0.899514347 | -0.014756408 | 0.016798792 | 1.001021714 | 0.985351935 | 1.016940685 |  |  |  |  |  |  |  |

**Supplementary Table 8** SNPs and F value for MVMR

| F value for Nap-Hyp-T2D-SAP | SNP | exposure | id.exposure | effect_allele.exposure | other_allele.exposure | eaf.exposure | beta.exposure | se.exposure | pval.exposure | samplesize.exposure | R2 | F |
| --- | --- | --- | --- | --- | --- | --- | --- | --- | --- | --- | --- | --- |
| rs10875622 | Nap during day || id:ukb-a-12 | ukb-a-12 | A | G | 0.575866 | 0.00979286 | 0.00145848 | 1.89E-11 | 337074 | 0.000133732 | 45.08328554 |
| rs11125776 | Nap during day || id:ukb-a-12 | ukb-a-12 | G | T | 0.145705 | -0.0146443 | 0.00204936 | 8.96E-13 | 337074 | 0.000151464 | 51.06203829 |
| rs11138082 | Nap during day || id:ukb-a-12 | ukb-a-12 | C | T | 0.204972 | 0.0141577 | 0.00178528 | 2.19E-15 | 337074 | 0.000186538 | 62.88834338 |
| rs12140153 | Nap during day || id:ukb-a-12 | ukb-a-12 | T | G | 0.0967607 | -0.0267869 | 0.00249768 | 7.87E-27 | 337074 | 0.000341113 | 115.0187765 |
| rs12147887 | Nap during day || id:ukb-a-12 | ukb-a-12 | T | C | 0.184888 | 0.0108139 | 0.00185585 | 5.65E-09 | 337074 | 0.000100719 | 33.95286128 |
| rs12193281 | Nap during day || id:ukb-a-12 | ukb-a-12 | C | T | 0.331103 | -0.00979444 | 0.00153092 | 1.58E-10 | 337074 | 0.000121416 | 40.93093353 |
| rs12451365 | Nap during day || id:ukb-a-12 | ukb-a-12 | C | T | 0.204513 | 0.0110612 | 0.00178363 | 5.60E-10 | 337074 | 0.000114083 | 38.45850309 |
| rs12506659 | Nap during day || id:ukb-a-12 | ukb-a-12 | T | C | 0.485703 | -0.00892164 | 0.00144688 | 7.01E-10 | 337074 | 0.000112785 | 38.02084686 |
| rs12682981 | Nap during day || id:ukb-a-12 | ukb-a-12 | G | A | 0.254182 | -0.0101414 | 0.00165954 | 9.91E-10 | 337074 | 0.000110776 | 37.343739 |
| rs17369061 | Nap during day || id:ukb-a-12 | ukb-a-12 | C | T | 0.128356 | -0.0117463 | 0.00215139 | 4.77E-08 | 337074 | 8.84E-05 | 29.80995421 |
| rs174541 | Nap during day || id:ukb-a-12 | ukb-a-12 | C | T | 0.360594 | 0.0101442 | 0.00149822 | 1.28E-11 | 337074 | 0.000135988 | 45.84393085 |
| rs17502738 | Nap during day || id:ukb-a-12 | ukb-a-12 | C | T | 0.195985 | -0.0102645 | 0.00181595 | 1.58E-08 | 337074 | 9.48E-05 | 31.94958697 |
| rs17723754 | Nap during day || id:ukb-a-12 | ukb-a-12 | T | C | 0.427454 | -0.0137289 | 0.00145817 | 4.75E-21 | 337074 | 0.000262915 | 88.64466205 |
| rs1836124 | Nap during day || id:ukb-a-12 | ukb-a-12 | T | C | 0.298829 | -0.0086352 | 0.0015721 | 3.96E-08 | 337074 | 8.95E-05 | 30.17045704 |
| rs1843815 | Nap during day || id:ukb-a-12 | ukb-a-12 | T | A | 0.546169 | 0.0080935 | 0.00144695 | 2.23E-08 | 337074 | 9.28E-05 | 31.28694199 |
| rs1968557 | Nap during day || id:ukb-a-12 | ukb-a-12 | T | C | 0.494653 | -0.00800284 | 0.0014414 | 2.82E-08 | 337074 | 9.14E-05 | 30.82596323 |
| rs1983336 | Nap during day || id:ukb-a-12 | ukb-a-12 | A | G | 0.405028 | 0.0178914 | 0.00147118 | 5.08E-34 | 337074 | 0.000438572 | 147.8953261 |
| rs2033103 | Nap during day || id:ukb-a-12 | ukb-a-12 | T | C | 0.452251 | 0.00867968 | 0.00144735 | 2.01E-09 | 337074 | 0.000106681 | 35.96314966 |
| rs2250377 | Nap during day || id:ukb-a-12 | ukb-a-12 | G | A | 0.661574 | -0.0153252 | 0.00152035 | 6.82E-24 | 337074 | 0.000301348 | 101.6067519 |
| rs2370926 | Nap during day || id:ukb-a-12 | ukb-a-12 | C | T | 0.366603 | -0.00835538 | 0.00149826 | 2.45E-08 | 337074 | 9.23E-05 | 31.09964743 |
| rs2431108 | Nap during day || id:ukb-a-12 | ukb-a-12 | C | T | 0.329053 | 0.013171 | 0.00153176 | 8.10E-18 | 337074 | 0.000219298 | 73.93557829 |
| rs253662 | Nap during day || id:ukb-a-12 | ukb-a-12 | C | T | 0.810216 | 0.0103879 | 0.0018335 | 1.47E-08 | 337074 | 9.52E-05 | 32.09897134 |
| rs2555571 | Nap during day || id:ukb-a-12 | ukb-a-12 | G | T | 0.519615 | -0.00789435 | 0.00144244 | 4.43E-08 | 337074 | 8.89E-05 | 29.9526094 |
| rs2653349 | Nap during day || id:ukb-a-12 | ukb-a-12 | G | A | 0.783617 | -0.0166983 | 0.00174928 | 1.36E-21 | 337074 | 0.000270261 | 91.12200773 |
| rs2769916 | Nap during day || id:ukb-a-12 | ukb-a-12 | A | G | 0.689264 | 0.0085258 | 0.00155807 | 4.45E-08 | 337074 | 8.88E-05 | 29.94289404 |
| rs2836918 | Nap during day || id:ukb-a-12 | ukb-a-12 | C | T | 0.285281 | 0.00908323 | 0.00159998 | 1.37E-08 | 337074 | 9.56E-05 | 32.22915639 |
| rs285793 | Nap during day || id:ukb-a-12 | ukb-a-12 | A | G | 0.538181 | -0.00867653 | 0.00144812 | 2.08E-09 | 337074 | 0.000106491 | 35.89884413 |
| rs35011311 | Nap during day || id:ukb-a-12 | ukb-a-12 | T | G | 0.266754 | -0.00895823 | 0.00163987 | 4.69E-08 | 337074 | 8.85E-05 | 29.84166142 |
| rs35039375 | Nap during day || id:ukb-a-12 | ukb-a-12 | G | A | 0.0922067 | 0.0144459 | 0.00250586 | 8.18E-09 | 337074 | 9.86E-05 | 33.23326603 |
| rs3935190 | Nap during day || id:ukb-a-12 | ukb-a-12 | A | G | 0.534346 | 0.00873751 | 0.0014508 | 1.72E-09 | 337074 | 0.000107594 | 36.2708473 |
| rs429358 | Nap during day || id:ukb-a-12 | ukb-a-12 | C | T | 0.156331 | -0.00856433 | 0.00198239 | 1.56E-05 | 337074 | 5.54E-05 | 18.66405531 |
| rs4971718 | Nap during day || id:ukb-a-12 | ukb-a-12 | T | C | 0.501816 | 0.00900348 | 0.00143818 | 3.85E-10 | 337074 | 0.000116257 | 39.19148699 |
| rs60579048 | Nap during day || id:ukb-a-12 | ukb-a-12 | G | T | 0.168441 | -0.0120801 | 0.00192353 | 3.39E-10 | 337074 | 0.000116995 | 39.44033125 |
| rs614987 | Nap during day || id:ukb-a-12 | ukb-a-12 | C | A | 0.61521 | 0.0120846 | 0.00148376 | 3.82E-16 | 337074 | 0.000196755 | 66.3337676 |
| rs6854055 | Nap during day || id:ukb-a-12 | ukb-a-12 | T | G | 0.746635 | 0.0122474 | 0.00166173 | 1.71E-13 | 337074 | 0.000161128 | 54.3205685 |
| rs742787 | Nap during day || id:ukb-a-12 | ukb-a-12 | C | T | 0.370452 | -0.0102286 | 0.00148994 | 6.65E-12 | 337074 | 0.000139801 | 47.1294373 |
| rs76177300 | Nap during day || id:ukb-a-12 | ukb-a-12 | A | G | 0.0540764 | 0.0123941 | 0.00321277 | 0.000114446 | 337074 | 4.41E-05 | 14.88223449 |
| rs908442 | Nap during day || id:ukb-a-12 | ukb-a-12 | T | A | 0.408422 | -0.0110406 | 0.00146731 | 5.31E-14 | 337074 | 0.000167936 | 56.61597879 |
| rs962247 | Nap during day || id:ukb-a-12 | ukb-a-12 | A | G | 0.476597 | -0.00911236 | 0.00145269 | 3.55E-10 | 337074 | 0.000116719 | 39.34714876 |
| rs10059884 | Hypertension || id:finn-b-I9_HYPTENS | finn-b-I9_HYPTENS | A | C | 0.5856 | 0.0651 | 0.0092 | 1.92E-12 | 218754 | 0.000228839 | 50.07054883 |
| rs10185395 | Hypertension || id:finn-b-I9_HYPTENS | finn-b-I9_HYPTENS | T | G | 0.243 | 0.0587 | 0.0107 | 3.54E-08 | 218754 | 0.00013756 | 30.09571576 |
| rs10206833 | Hypertension || id:finn-b-I9_HYPTENS | finn-b-I9_HYPTENS | A | G | 0.8661 | -0.079 | 0.0134 | 3.56E-09 | 218754 | 0.000158862 | 34.75686645 |
| rs10217559 | Hypertension || id:finn-b-I9_HYPTENS | finn-b-I9_HYPTENS | T | C | 0.6936 | 0.0584 | 0.0099 | 3.87E-09 | 218754 | 0.000159049 | 34.79776368 |
| rs10786736 | Hypertension || id:finn-b-I9_HYPTENS | finn-b-I9_HYPTENS | C | G | 0.09173 | -0.1089 | 0.0158 | 5.49E-12 | 218754 | 0.000217116 | 47.50481323 |
| rs10938397 | Hypertension || id:finn-b-I9_HYPTENS | finn-b-I9_HYPTENS | G | A | 0.4736 | 0.0358 | 0.0091 | 9.04E-05 | 218754 | 7.07E-05 | 15.47673327 |
| rs11636952 | Hypertension || id:finn-b-I9_HYPTENS | finn-b-I9_HYPTENS | C | T | 0.6071 | -0.055 | 0.0094 | 4.21E-09 | 218754 | 0.000156475 | 34.23463494 |
| rs117515309 | Hypertension || id:finn-b-I9_HYPTENS | finn-b-I9_HYPTENS | A | C | 0.06182 | -0.1088 | 0.019 | 1.10E-08 | 218754 | 0.000149875 | 32.79039273 |
| rs12509595 | Hypertension || id:finn-b-I9_HYPTENS | finn-b-I9_HYPTENS | C | T | 0.3122 | 0.1157 | 0.0099 | 1.34E-31 | 218754 | 0.000623978 | 136.581651 |
| rs1275984 | Hypertension || id:finn-b-I9_HYPTENS | finn-b-I9_HYPTENS | C | A | 0.549 | -0.0953 | 0.0092 | 3.38E-25 | 218754 | 0.000490277 | 107.3015946 |
| rs12967878 | Hypertension || id:finn-b-I9_HYPTENS | finn-b-I9_HYPTENS | C | T | 0.1812 | 0.0468 | 0.0118 | 7.56E-05 | 218754 | 7.19E-05 | 15.72981884 |
| rs13112725 | Hypertension || id:finn-b-I9_HYPTENS | finn-b-I9_HYPTENS | C | G | 0.8285 | 0.0697 | 0.0121 | 9.34E-09 | 218754 | 0.000151661 | 33.18110501 |
| rs1317181 | Hypertension || id:finn-b-I9_HYPTENS | finn-b-I9_HYPTENS | T | G | 0.2099 | 0.0701 | 0.0112 | 4.04E-10 | 218754 | 0.000179047 | 39.1738287 |
| rs1358350 | Hypertension || id:finn-b-I9_HYPTENS | finn-b-I9_HYPTENS | A | T | 0.7541 | 0.0663 | 0.0106 | 4.59E-10 | 218754 | 0.000178806 | 39.12112684 |
| rs1374264 | Hypertension || id:finn-b-I9_HYPTENS | finn-b-I9_HYPTENS | C | A | 0.4146 | -0.0603 | 0.0092 | 6.95E-11 | 218754 | 0.000196344 | 42.95908266 |
| rs143439093 | Hypertension || id:finn-b-I9_HYPTENS | finn-b-I9_HYPTENS | G | A | 0.07436 | -0.1373 | 0.0175 | 5.01E-15 | 218754 | 0.000281311 | 61.55466987 |
| rs149150643 | Hypertension || id:finn-b-I9_HYPTENS | finn-b-I9_HYPTENS | C | T | 0.04503 | -0.1328 | 0.0222 | 2.27E-09 | 218754 | 0.000163555 | 35.78378127 |
| rs167479 | Hypertension || id:finn-b-I9_HYPTENS | finn-b-I9_HYPTENS | T | G | 0.4249 | -0.0833 | 0.0093 | 2.66E-19 | 218754 | 0.000366614 | 80.22692288 |
| rs16853076 | Hypertension || id:finn-b-I9_HYPTENS | finn-b-I9_HYPTENS | C | T | 0.06089 | -0.1096 | 0.0192 | 1.06E-08 | 218754 | 0.000148935 | 32.58477153 |
| rs188155432 | Hypertension || id:finn-b-I9_HYPTENS | finn-b-I9_HYPTENS | T | C | 0.02363 | 0.1977 | 0.0303 | 7.04E-11 | 218754 | 0.000194575 | 42.57200564 |
| rs1888693 | Hypertension || id:finn-b-I9_HYPTENS | finn-b-I9_HYPTENS | A | G | 0.386 | 0.06 | 0.0094 | 1.45E-10 | 218754 | 0.000186213 | 40.74204489 |
| rs2032451 | Hypertension || id:finn-b-I9_HYPTENS | finn-b-I9_HYPTENS | T | G | 0.1098 | 0.0886 | 0.0146 | 1.28E-09 | 218754 | 0.000168319 | 36.82627243 |
| rs2190994 | Hypertension || id:finn-b-I9_HYPTENS | finn-b-I9_HYPTENS | T | G | 0.276 | -0.06 | 0.0103 | 5.09E-09 | 218754 | 0.000155097 | 33.93314249 |
| rs2274224 | Hypertension || id:finn-b-I9_HYPTENS | finn-b-I9_HYPTENS | C | G | 0.3456 | -0.0751 | 0.0096 | 5.64E-15 | 218754 | 0.000279679 | 61.19746566 |
| rs2627313 | Hypertension || id:finn-b-I9_HYPTENS | finn-b-I9_HYPTENS | T | C | 0.4006 | 0.054 | 0.0093 | 7.35E-09 | 218754 | 0.000154099 | 33.71457209 |
| rs2643826 | Hypertension || id:finn-b-I9_HYPTENS | finn-b-I9_HYPTENS | T | C | 0.4047 | 0.0627 | 0.0093 | 1.75E-11 | 218754 | 0.000207741 | 45.4532785 |
| rs2782981 | Hypertension || id:finn-b-I9_HYPTENS | finn-b-I9_HYPTENS | C | T | 0.6546 | 0.0799 | 0.0096 | 8.71E-17 | 218754 | 0.000316561 | 69.27030852 |
| rs34071855 | Hypertension || id:finn-b-I9_HYPTENS | finn-b-I9_HYPTENS | G | C | 0.415 | 0.1033 | 0.0093 | 1.04E-28 | 218754 | 0.000563682 | 123.3760254 |
| rs35619711 | Hypertension || id:finn-b-I9_HYPTENS | finn-b-I9_HYPTENS | G | C | 0.7217 | 0.0614 | 0.0102 | 1.65E-09 | 218754 | 0.000165618 | 36.23534729 |
| rs3790604 | Hypertension || id:finn-b-I9_HYPTENS | finn-b-I9_HYPTENS | A | C | 0.1709 | 0.1321 | 0.0121 | 1.40E-27 | 218754 | 0.000544556 | 119.1875586 |
| rs3796585 | Hypertension || id:finn-b-I9_HYPTENS | finn-b-I9_HYPTENS | A | G | 0.3465 | -0.0751 | 0.0096 | 4.48E-15 | 218754 | 0.000279679 | 61.19746566 |
| rs3918226 | Hypertension || id:finn-b-I9_HYPTENS | finn-b-I9_HYPTENS | T | C | 0.0699 | 0.1721 | 0.0179 | 7.08E-22 | 218754 | 0.000422392 | 92.43824852 |
| rs4371736 | Hypertension || id:finn-b-I9_HYPTENS | finn-b-I9_HYPTENS | C | G | 0.3821 | -0.0527 | 0.0094 | 2.09E-08 | 218754 | 0.000143664 | 31.43124274 |
| rs4932373 | Hypertension || id:finn-b-I9_HYPTENS | finn-b-I9_HYPTENS | C | A | 0.2674 | 0.0837 | 0.0103 | 5.58E-16 | 218754 | 0.000301779 | 66.03474361 |
| rs5215 | Hypertension || id:finn-b-I9_HYPTENS | finn-b-I9_HYPTENS | T | C | 0.5284 | -0.0325 | 0.0091 | 0.000381804 | 218754 | 5.83E-05 | 12.75498542 |
| rs62434119 | Hypertension || id:finn-b-I9_HYPTENS | finn-b-I9_HYPTENS | T | C | 0.07595 | -0.1345 | 0.0172 | 6.23E-15 | 218754 | 0.000279454 | 61.14820378 |
| rs62455829 | Hypertension || id:finn-b-I9_HYPTENS | finn-b-I9_HYPTENS | G | A | 0.2782 | -0.0598 | 0.0103 | 5.68E-09 | 218754 | 0.000154065 | 33.70729857 |
| rs629929 | Hypertension || id:finn-b-I9_HYPTENS | finn-b-I9_HYPTENS | T | G | 0.5795 | 0.0595 | 0.0093 | 1.36E-10 | 218754 | 0.000187081 | 40.93210351 |
| rs6668768 | Hypertension || id:finn-b-I9_HYPTENS | finn-b-I9_HYPTENS | T | C | 0.2144 | 0.0668 | 0.0111 | 1.87E-09 | 218754 | 0.000165531 | 36.21620975 |
| rs6860901 | Hypertension || id:finn-b-I9_HYPTENS | finn-b-I9_HYPTENS | T | C | 0.2979 | 0.0682 | 0.01 | 7.68E-12 | 218754 | 0.000212579 | 46.51197475 |
| rs6918791 | Hypertension || id:finn-b-I9_HYPTENS | finn-b-I9_HYPTENS | G | C | 0.728 | 0.0574 | 0.0103 | 2.15E-08 | 218754 | 0.000141949 | 31.05598904 |
| rs7134677 | Hypertension || id:finn-b-I9_HYPTENS | finn-b-I9_HYPTENS | T | C | 0.3819 | -0.0748 | 0.0094 | 2.13E-15 | 218754 | 0.000289378 | 63.32038079 |
| rs7224685 | Hypertension || id:finn-b-I9_HYPTENS | finn-b-I9_HYPTENS | T | G | 0.3017 | 0.0342 | 0.0099 | 0.000551404 | 218754 | 5.46E-05 | 11.93377519 |
| rs7451008 | Hypertension || id:finn-b-I9_HYPTENS | finn-b-I9_HYPTENS | C | T | 0.3294 | 0.0314 | 0.0097 | 0.00120199 | 218754 | 4.79E-05 | 10.47880737 |
| rs7483477 | Hypertension || id:finn-b-I9_HYPTENS | finn-b-I9_HYPTENS | G | T | 0.2348 | 0.0759 | 0.0109 | 3.12E-12 | 218754 | 0.000221604 | 48.48714191 |
| rs78412528 | Hypertension || id:finn-b-I9_HYPTENS | finn-b-I9_HYPTENS | A | G | 0.1674 | 0.1406 | 0.0122 | 1.03E-30 | 218754 | 0.00060678 | 132.8149641 |
| rs79873333 | Hypertension || id:finn-b-I9_HYPTENS | finn-b-I9_HYPTENS | T | C | 0.04758 | -0.1364 | 0.0215 | 2.11E-10 | 218754 | 0.000183957 | 40.24832861 |
| rs9899012 | Hypertension || id:finn-b-I9_HYPTENS | finn-b-I9_HYPTENS | A | G | 0.08387 | -0.1068 | 0.0166 | 1.41E-10 | 218754 | 0.000189186 | 41.39256683 |
| rs9940128 | Hypertension || id:finn-b-I9_HYPTENS | finn-b-I9_HYPTENS | A | G | 0.4289 | 0.0593 | 0.0092 | 1.22E-10 | 218754 | 0.000189887 | 41.5460521 |
| rs10245867 | Type 2 diabetes, definitions combined || id:finn-b-T2D | finn-b-T2D | T | G | 0.3308 | 0.0671 | 0.0115 | 5.19E-09 | 211766 | 0.00016074 | 34.04436656 |
| rs1046317 | Type 2 diabetes, definitions combined || id:finn-b-T2D | finn-b-T2D | C | T | 0.6106 | 0.0833 | 0.0111 | 6.90E-14 | 211766 | 0.000265872 | 56.31705597 |
| rs10770143 | Type 2 diabetes, definitions combined || id:finn-b-T2D | finn-b-T2D | T | C | 0.6621 | -0.0659 | 0.0114 | 8.42E-09 | 211766 | 0.000157774 | 33.41619717 |
| rs10830963 | Type 2 diabetes, definitions combined || id:finn-b-T2D | finn-b-T2D | G | C | 0.3567 | 0.1317 | 0.0113 | 1.99E-31 | 211766 | 0.000641032 | 135.8346479 |
| rs10882099 | Type 2 diabetes, definitions combined || id:finn-b-T2D | finn-b-T2D | C | T | 0.4771 | -0.0789 | 0.0108 | 3.16E-13 | 211766 | 0.000251965 | 53.37063792 |
| rs10938397 | Type 2 diabetes, definitions combined || id:finn-b-T2D | finn-b-T2D | G | A | 0.4735 | 0.0741 | 0.0108 | 7.51E-12 | 211766 | 0.000222247 | 47.07440109 |
| rs112108223 | Type 2 diabetes, definitions combined || id:finn-b-T2D | finn-b-T2D | A | G | 0.02244 | -0.3726 | 0.038 | 1.04E-22 | 211766 | 0.000453801 | 96.14227758 |
| rs11257658 | Type 2 diabetes, definitions combined || id:finn-b-T2D | finn-b-T2D | G | A | 0.7353 | -0.086 | 0.0123 | 3.00E-12 | 211766 | 0.000230797 | 48.88578326 |
| rs112694524 | Type 2 diabetes, definitions combined || id:finn-b-T2D | finn-b-T2D | A | G | 0.0335 | -0.1809 | 0.0306 | 3.47E-09 | 211766 | 0.000165009 | 34.94863187 |
| rs11558471 | Type 2 diabetes, definitions combined || id:finn-b-T2D | finn-b-T2D | G | A | 0.3785 | -0.0816 | 0.0111 | 2.48E-13 | 211766 | 0.000255133 | 54.04185629 |
| rs11712037 | Type 2 diabetes, definitions combined || id:finn-b-T2D | finn-b-T2D | G | C | 0.1708 | -0.1102 | 0.0144 | 2.00E-14 | 211766 | 0.000276479 | 58.56445461 |
| rs12140153 | Type 2 diabetes, definitions combined || id:finn-b-T2D | finn-b-T2D | T | G | 0.07889 | -0.0746 | 0.0202 | 0.000229699 | 211766 | 6.44E-05 | 13.6386321 |
| rs12449219 | Type 2 diabetes, definitions combined || id:finn-b-T2D | finn-b-T2D | G | C | 0.05832 | 0.1308 | 0.0232 | 1.76E-08 | 211766 | 0.000150078 | 31.78596615 |
| rs12967878 | Type 2 diabetes, definitions combined || id:finn-b-T2D | finn-b-T2D | C | T | 0.1809 | 0.0771 | 0.014 | 3.82E-08 | 211766 | 0.000143197 | 30.32833601 |
| rs1397566 | Type 2 diabetes, definitions combined || id:finn-b-T2D | finn-b-T2D | G | A | 0.4276 | -0.0596 | 0.0109 | 4.57E-08 | 211766 | 0.000141163 | 29.89753768 |
| rs174541 | Type 2 diabetes, definitions combined || id:finn-b-T2D | finn-b-T2D | C | T | 0.4447 | -0.0391 | 0.0109 | 0.000322003 | 211766 | 6.08E-05 | 12.86756638 |
| rs182788819 | Type 2 diabetes, definitions combined || id:finn-b-T2D | finn-b-T2D | T | C | 0.03872 | 0.1553 | 0.028 | 3.05E-08 | 211766 | 0.000145247 | 30.76257936 |
| rs28553330 | Type 2 diabetes, definitions combined || id:finn-b-T2D | finn-b-T2D | C | T | 0.0605 | -0.1278 | 0.0229 | 2.44E-08 | 211766 | 0.000147052 | 31.14487852 |
| rs28642213 | Type 2 diabetes, definitions combined || id:finn-b-T2D | finn-b-T2D | G | A | 0.6971 | 0.1012 | 0.0118 | 8.39E-18 | 211766 | 0.000347208 | 73.55173281 |
| rs34872471 | Type 2 diabetes, definitions combined || id:finn-b-T2D | finn-b-T2D | C | T | 0.2011 | 0.3058 | 0.0137 | 6.00E-110 | 211766 | 0.002347237 | 498.2298302 |
| rs3887925 | Type 2 diabetes, definitions combined || id:finn-b-T2D | finn-b-T2D | T | C | 0.4629 | 0.0607 | 0.0109 | 2.39E-08 | 211766 | 0.000146421 | 31.0113223 |
| rs429358 | Type 2 diabetes, definitions combined || id:finn-b-T2D | finn-b-T2D | C | T | 0.1827 | -0.0807 | 0.0142 | 1.35E-08 | 211766 | 0.000152492 | 32.29730457 |
| rs5215 | Type 2 diabetes, definitions combined || id:finn-b-T2D | finn-b-T2D | T | C | 0.5286 | -0.0616 | 0.0108 | 1.27E-08 | 211766 | 0.0001536 | 32.53192869 |
| rs55993634 | Type 2 diabetes, definitions combined || id:finn-b-T2D | finn-b-T2D | G | C | 0.08715 | -0.1638 | 0.0194 | 2.95E-17 | 211766 | 0.000336529 | 71.2886242 |
| rs56348580 | Type 2 diabetes, definitions combined || id:finn-b-T2D | finn-b-T2D | C | G | 0.2829 | -0.0782 | 0.0121 | 9.50E-11 | 211766 | 0.000197197 | 41.76751756 |
| rs6073386 | Type 2 diabetes, definitions combined || id:finn-b-T2D | finn-b-T2D | G | A | 0.0366 | 0.186 | 0.0285 | 6.99E-11 | 211766 | 0.000201091 | 42.59239552 |
| rs6780171 | Type 2 diabetes, definitions combined || id:finn-b-T2D | finn-b-T2D | A | T | 0.3063 | 0.0937 | 0.0117 | 1.10E-15 | 211766 | 0.000302775 | 64.13621946 |
| rs6786846 | Type 2 diabetes, definitions combined || id:finn-b-T2D | finn-b-T2D | A | G | 0.681 | 0.0735 | 0.0116 | 2.47E-10 | 211766 | 0.000189548 | 40.14713867 |
| rs7018475 | Type 2 diabetes, definitions combined || id:finn-b-T2D | finn-b-T2D | G | T | 0.2788 | 0.1144 | 0.0121 | 2.84E-21 | 211766 | 0.000421931 | 89.38758553 |
| rs71330995 | Type 2 diabetes, definitions combined || id:finn-b-T2D | finn-b-T2D | A | G | 0.1878 | -0.0919 | 0.0139 | 3.73E-11 | 211766 | 0.000206374 | 43.71166211 |
| rs7224685 | Type 2 diabetes, definitions combined || id:finn-b-T2D | finn-b-T2D | T | G | 0.3016 | 0.0642 | 0.0117 | 4.48E-08 | 211766 | 0.000142161 | 30.10885436 |
| rs73113806 | Type 2 diabetes, definitions combined || id:finn-b-T2D | finn-b-T2D | T | C | 0.02329 | 0.255 | 0.0359 | 1.16E-12 | 211766 | 0.000238195 | 50.45304264 |
| rs73541184 | Type 2 diabetes, definitions combined || id:finn-b-T2D | finn-b-T2D | A | G | 0.3086 | -0.0864 | 0.0117 | 1.89E-13 | 211766 | 0.000257447 | 54.53202935 |
| rs7451008 | Type 2 diabetes, definitions combined || id:finn-b-T2D | finn-b-T2D | C | T | 0.3291 | 0.1281 | 0.0115 | 5.43E-29 | 211766 | 0.000585588 | 124.079055 |
| rs74862545 | Type 2 diabetes, definitions combined || id:finn-b-T2D | finn-b-T2D | T | C | 0.01954 | -0.2575 | 0.0404 | 1.92E-10 | 211766 | 0.000191802 | 40.62446315 |
| rs76177300 | Type 2 diabetes, definitions combined || id:finn-b-T2D | finn-b-T2D | A | G | 0.05776 | 0.1373 | 0.0232 | 3.09E-09 | 211766 | 0.000165363 | 35.02361764 |
| rs76895963 | Type 2 diabetes, definitions combined || id:finn-b-T2D | finn-b-T2D | G | T | 0.03126 | -0.5078 | 0.0339 | 8.71E-51 | 211766 | 0.001058449 | 224.3788382 |
| rs77655131 | Type 2 diabetes, definitions combined || id:finn-b-T2D | finn-b-T2D | T | C | 0.1834 | 0.099 | 0.014 | 1.65E-12 | 211766 | 0.000236078 | 50.00462977 |
| rs78470967 | Type 2 diabetes, definitions combined || id:finn-b-T2D | finn-b-T2D | A | T | 0.03951 | -0.2434 | 0.0285 | 1.23E-17 | 211766 | 0.000344307 | 72.93690425 |
| rs7998259 | Type 2 diabetes, definitions combined || id:finn-b-T2D | finn-b-T2D | A | G | 0.3895 | -0.0767 | 0.0112 | 6.18E-12 | 211766 | 0.000221413 | 46.89759598 |
| rs8353 | Type 2 diabetes, definitions combined || id:finn-b-T2D | finn-b-T2D | T | G | 0.3009 | -0.0745 | 0.0118 | 2.71E-10 | 211766 | 0.000188196 | 39.86065485 |
| rs878521 | Type 2 diabetes, definitions combined || id:finn-b-T2D | finn-b-T2D | A | G | 0.2072 | 0.0896 | 0.0133 | 1.82E-11 | 211766 | 0.000214271 | 45.38461292 |
| rs9505086 | Type 2 diabetes, definitions combined || id:finn-b-T2D | finn-b-T2D | C | T | 0.4438 | 0.0642 | 0.0109 | 4.37E-09 | 211766 | 0.000163791 | 34.69069164 |
| rs9940128 | Type 2 diabetes, definitions combined || id:finn-b-T2D | finn-b-T2D | A | G | 0.4288 | 0.1173 | 0.0109 | 6.11E-27 | 211766 | 0.000546574 | 115.8080974 |
| F value for Narcolepsy-Hyp-SAP | rs10900858 | Daytime dozing / sleeping (narcolepsy) || id:ukb-a-15 | ukb-a-15 | G | A | 0.527116 | -0.00664634 | 0.00120158 | 3.18E-08 | 336082 | 9.10E-05 | 30.59547091 |
| rs12140153 | Daytime dozing / sleeping (narcolepsy) || id:ukb-a-15 | ukb-a-15 | T | G | 0.0967607 | -0.0173084 | 0.00208364 | 9.87E-17 | 336082 | 0.000205274 | 69.00266908 |
| rs13010456 | Daytime dozing / sleeping (narcolepsy) || id:ukb-a-15 | ukb-a-15 | G | A | 0.406041 | -0.0089982 | 0.00122662 | 2.21E-13 | 336082 | 0.000160095 | 53.81317497 |
| rs13023284 | Daytime dozing / sleeping (narcolepsy) || id:ukb-a-15 | ukb-a-15 | C | T | 0.603922 | -0.0080953 | 0.00122679 | 4.15E-11 | 336082 | 0.000129546 | 43.54345208 |
| rs13284688 | Daytime dozing / sleeping (narcolepsy) || id:ukb-a-15 | ukb-a-15 | C | T | 0.206218 | 0.0102683 | 0.00148531 | 4.75E-12 | 336082 | 0.000142186 | 47.79256096 |
| rs285793 | Daytime dozing / sleeping (narcolepsy) || id:ukb-a-15 | ukb-a-15 | A | G | 0.538181 | -0.00701679 | 0.00120813 | 6.33E-09 | 336082 | 0.00010036 | 33.73238404 |
| rs3122170 | Daytime dozing / sleeping (narcolepsy) || id:ukb-a-15 | ukb-a-15 | A | C | 0.767837 | -0.00907205 | 0.00142994 | 2.24E-10 | 336082 | 0.000119751 | 40.25062756 |
| rs35284403 | Daytime dozing / sleeping (narcolepsy) || id:ukb-a-15 | ukb-a-15 | C | T | 0.350137 | 0.007258 | 0.00126183 | 8.83E-09 | 336082 | 9.84E-05 | 33.08488628 |
| rs4242242 | Daytime dozing / sleeping (narcolepsy) || id:ukb-a-15 | ukb-a-15 | A | G | 0.41895 | -0.00729813 | 0.00121686 | 2.01E-09 | 336082 | 0.000107016 | 35.96991196 |
| rs553314 | Daytime dozing / sleeping (narcolepsy) || id:ukb-a-15 | ukb-a-15 | C | T | 0.633536 | -0.00740627 | 0.00125589 | 3.70E-09 | 336082 | 0.000103468 | 34.7770942 |
| rs72779268 | Daytime dozing / sleeping (narcolepsy) || id:ukb-a-15 | ukb-a-15 | A | C | 0.0523756 | -0.00853549 | 0.00268871 | 0.00150076 | 336082 | 3.00E-05 | 10.07781557 |
| rs780093 | Daytime dozing / sleeping (narcolepsy) || id:ukb-a-15 | ukb-a-15 | C | T | 0.618676 | -0.00801892 | 0.00123565 | 8.62E-11 | 336082 | 0.000125297 | 42.1151382 |
| rs811483 | Daytime dozing / sleeping (narcolepsy) || id:ukb-a-15 | ukb-a-15 | T | C | 0.167591 | -0.0092942 | 0.00160829 | 7.52E-09 | 336082 | 9.94E-05 | 33.39586677 |
| rs843372 | Daytime dozing / sleeping (narcolepsy) || id:ukb-a-15 | ukb-a-15 | T | C | 0.769689 | -0.00812548 | 0.00143111 | 1.37E-08 | 336082 | 9.59E-05 | 32.23661512 |
| rs10059884 | Hypertension || id:finn-b-I9_HYPTENS | finn-b-I9_HYPTENS | A | C | 0.5856 | 0.0651 | 0.0092 | 1.92E-12 | 218754 | 0.000228839 | 50.07054883 |
| rs10185395 | Hypertension || id:finn-b-I9_HYPTENS | finn-b-I9_HYPTENS | T | G | 0.243 | 0.0587 | 0.0107 | 3.54E-08 | 218754 | 0.00013756 | 30.09571576 |
| rs10206833 | Hypertension || id:finn-b-I9_HYPTENS | finn-b-I9_HYPTENS | A | G | 0.8661 | -0.079 | 0.0134 | 3.56E-09 | 218754 | 0.000158862 | 34.75686645 |
| rs10217559 | Hypertension || id:finn-b-I9_HYPTENS | finn-b-I9_HYPTENS | T | C | 0.6936 | 0.0584 | 0.0099 | 3.87E-09 | 218754 | 0.000159049 | 34.79776368 |
| rs10757274 | Hypertension || id:finn-b-I9_HYPTENS | finn-b-I9_HYPTENS | G | A | 0.432 | 0.0507 | 0.0092 | 3.52E-08 | 218754 | 0.000138811 | 30.3694057 |
| rs10786736 | Hypertension || id:finn-b-I9_HYPTENS | finn-b-I9_HYPTENS | C | G | 0.09173 | -0.1089 | 0.0158 | 5.49E-12 | 218754 | 0.000217116 | 47.50481323 |
| rs11636952 | Hypertension || id:finn-b-I9_HYPTENS | finn-b-I9_HYPTENS | C | T | 0.6071 | -0.055 | 0.0094 | 4.21E-09 | 218754 | 0.000156475 | 34.23463494 |
| rs117515309 | Hypertension || id:finn-b-I9_HYPTENS | finn-b-I9_HYPTENS | A | C | 0.06182 | -0.1088 | 0.019 | 1.10E-08 | 218754 | 0.000149875 | 32.79039273 |
| rs12509595 | Hypertension || id:finn-b-I9_HYPTENS | finn-b-I9_HYPTENS | C | T | 0.3122 | 0.1157 | 0.0099 | 1.34E-31 | 218754 | 0.000623978 | 136.581651 |
| rs1275984 | Hypertension || id:finn-b-I9_HYPTENS | finn-b-I9_HYPTENS | C | A | 0.549 | -0.0953 | 0.0092 | 3.38E-25 | 218754 | 0.000490277 | 107.3015946 |
| rs12828438 | Hypertension || id:finn-b-I9_HYPTENS | finn-b-I9_HYPTENS | G | A | 0.5354 | -0.0606 | 0.0092 | 5.01E-11 | 218754 | 0.000198302 | 43.38759954 |
| rs13112725 | Hypertension || id:finn-b-I9_HYPTENS | finn-b-I9_HYPTENS | C | G | 0.8285 | 0.0697 | 0.0121 | 9.34E-09 | 218754 | 0.000151661 | 33.18110501 |
| rs1317181 | Hypertension || id:finn-b-I9_HYPTENS | finn-b-I9_HYPTENS | T | G | 0.2099 | 0.0701 | 0.0112 | 4.04E-10 | 218754 | 0.000179047 | 39.1738287 |
| rs1358350 | Hypertension || id:finn-b-I9_HYPTENS | finn-b-I9_HYPTENS | A | T | 0.7541 | 0.0663 | 0.0106 | 4.59E-10 | 218754 | 0.000178806 | 39.12112684 |
| rs1374264 | Hypertension || id:finn-b-I9_HYPTENS | finn-b-I9_HYPTENS | C | A | 0.4146 | -0.0603 | 0.0092 | 6.95E-11 | 218754 | 0.000196344 | 42.95908266 |
| rs143439093 | Hypertension || id:finn-b-I9_HYPTENS | finn-b-I9_HYPTENS | G | A | 0.07436 | -0.1373 | 0.0175 | 5.01E-15 | 218754 | 0.000281311 | 61.55466987 |
| rs145153053 | Hypertension || id:finn-b-I9_HYPTENS | finn-b-I9_HYPTENS | G | A | 0.1963 | 0.0707 | 0.0115 | 7.54E-10 | 218754 | 0.000172748 | 37.79542004 |
| rs149150643 | Hypertension || id:finn-b-I9_HYPTENS | finn-b-I9_HYPTENS | C | T | 0.04503 | -0.1328 | 0.0222 | 2.27E-09 | 218754 | 0.000163555 | 35.78378127 |
| rs167479 | Hypertension || id:finn-b-I9_HYPTENS | finn-b-I9_HYPTENS | T | G | 0.4249 | -0.0833 | 0.0093 | 2.66E-19 | 218754 | 0.000366614 | 80.22692288 |
| rs16853076 | Hypertension || id:finn-b-I9_HYPTENS | finn-b-I9_HYPTENS | C | T | 0.06089 | -0.1096 | 0.0192 | 1.06E-08 | 218754 | 0.000148935 | 32.58477153 |
| rs188155432 | Hypertension || id:finn-b-I9_HYPTENS | finn-b-I9_HYPTENS | T | C | 0.02363 | 0.1977 | 0.0303 | 7.04E-11 | 218754 | 0.000194575 | 42.57200564 |
| rs1888693 | Hypertension || id:finn-b-I9_HYPTENS | finn-b-I9_HYPTENS | A | G | 0.386 | 0.06 | 0.0094 | 1.45E-10 | 218754 | 0.000186213 | 40.74204489 |
| rs2032451 | Hypertension || id:finn-b-I9_HYPTENS | finn-b-I9_HYPTENS | T | G | 0.1098 | 0.0886 | 0.0146 | 1.28E-09 | 218754 | 0.000168319 | 36.82627243 |
| rs2190994 | Hypertension || id:finn-b-I9_HYPTENS | finn-b-I9_HYPTENS | T | G | 0.276 | -0.06 | 0.0103 | 5.09E-09 | 218754 | 0.000155097 | 33.93314249 |
| rs2274224 | Hypertension || id:finn-b-I9_HYPTENS | finn-b-I9_HYPTENS | C | G | 0.3456 | -0.0751 | 0.0096 | 5.64E-15 | 218754 | 0.000279679 | 61.19746566 |
| rs2392929 | Hypertension || id:finn-b-I9_HYPTENS | finn-b-I9_HYPTENS | G | T | 0.2979 | 0.062 | 0.01 | 5.21E-10 | 218754 | 0.000175692 | 38.43964855 |
| rs2627313 | Hypertension || id:finn-b-I9_HYPTENS | finn-b-I9_HYPTENS | T | C | 0.4006 | 0.054 | 0.0093 | 7.35E-09 | 218754 | 0.000154099 | 33.71457209 |
| rs2643826 | Hypertension || id:finn-b-I9_HYPTENS | finn-b-I9_HYPTENS | T | C | 0.4047 | 0.0627 | 0.0093 | 1.75E-11 | 218754 | 0.000207741 | 45.4532785 |
| rs2782981 | Hypertension || id:finn-b-I9_HYPTENS | finn-b-I9_HYPTENS | C | T | 0.6546 | 0.0799 | 0.0096 | 8.71E-17 | 218754 | 0.000316561 | 69.27030852 |
| rs28567725 | Hypertension || id:finn-b-I9_HYPTENS | finn-b-I9_HYPTENS | C | T | 0.4136 | 0.0617 | 0.0093 | 2.76E-11 | 218754 | 0.000201169 | 44.01497508 |
| rs303949 | Hypertension || id:finn-b-I9_HYPTENS | finn-b-I9_HYPTENS | C | A | 0.09934 | 0.0849 | 0.0153 | 2.70E-08 | 218754 | 0.000140739 | 30.79133709 |
| rs34071855 | Hypertension || id:finn-b-I9_HYPTENS | finn-b-I9_HYPTENS | G | C | 0.415 | 0.1033 | 0.0093 | 1.04E-28 | 218754 | 0.000563682 | 123.3760254 |
| rs35427 | Hypertension || id:finn-b-I9_HYPTENS | finn-b-I9_HYPTENS | G | T | 0.3644 | -0.0592 | 0.0096 | 5.91E-10 | 218754 | 0.000173808 | 38.0274301 |
| rs35619711 | Hypertension || id:finn-b-I9_HYPTENS | finn-b-I9_HYPTENS | G | C | 0.7217 | 0.0614 | 0.0102 | 1.65E-09 | 218754 | 0.000165618 | 36.23534729 |
| rs3790604 | Hypertension || id:finn-b-I9_HYPTENS | finn-b-I9_HYPTENS | A | C | 0.1709 | 0.1321 | 0.0121 | 1.40E-27 | 218754 | 0.000544556 | 119.1875586 |
| rs3796585 | Hypertension || id:finn-b-I9_HYPTENS | finn-b-I9_HYPTENS | A | G | 0.3465 | -0.0751 | 0.0096 | 4.48E-15 | 218754 | 0.000279679 | 61.19746566 |
| rs3918226 | Hypertension || id:finn-b-I9_HYPTENS | finn-b-I9_HYPTENS | T | C | 0.0699 | 0.1721 | 0.0179 | 7.08E-22 | 218754 | 0.000422392 | 92.43824852 |
| rs4371736 | Hypertension || id:finn-b-I9_HYPTENS | finn-b-I9_HYPTENS | C | G | 0.3821 | -0.0527 | 0.0094 | 2.09E-08 | 218754 | 0.000143664 | 31.43124274 |
| rs4685218 | Hypertension || id:finn-b-I9_HYPTENS | finn-b-I9_HYPTENS | T | C | 0.09873 | 0.0984 | 0.0153 | 1.30E-10 | 218754 | 0.000189047 | 41.3621747 |
| rs4932373 | Hypertension || id:finn-b-I9_HYPTENS | finn-b-I9_HYPTENS | C | A | 0.2674 | 0.0837 | 0.0103 | 5.58E-16 | 218754 | 0.000301779 | 66.03474361 |
| rs557675 | Hypertension || id:finn-b-I9_HYPTENS | finn-b-I9_HYPTENS | G | T | 0.3969 | -0.0613 | 0.0093 | 5.42E-11 | 218754 | 0.00019857 | 43.44612839 |
| rs604723 | Hypertension || id:finn-b-I9_HYPTENS | finn-b-I9_HYPTENS | C | T | 0.741 | 0.0632 | 0.0104 | 1.36E-09 | 218754 | 0.000168787 | 36.92865645 |
| rs62426324 | Hypertension || id:finn-b-I9_HYPTENS | finn-b-I9_HYPTENS | T | C | 0.5009 | 0.0528 | 0.0091 | 7.13E-09 | 218754 | 0.000153873 | 33.66519154 |
| rs62434119 | Hypertension || id:finn-b-I9_HYPTENS | finn-b-I9_HYPTENS | T | C | 0.07595 | -0.1345 | 0.0172 | 6.23E-15 | 218754 | 0.000279454 | 61.14820378 |
| rs62455829 | Hypertension || id:finn-b-I9_HYPTENS | finn-b-I9_HYPTENS | G | A | 0.2782 | -0.0598 | 0.0103 | 5.68E-09 | 218754 | 0.000154065 | 33.70729857 |
| rs629929 | Hypertension || id:finn-b-I9_HYPTENS | finn-b-I9_HYPTENS | T | G | 0.5795 | 0.0595 | 0.0093 | 1.36E-10 | 218754 | 0.000187081 | 40.93210351 |
| rs6668768 | Hypertension || id:finn-b-I9_HYPTENS | finn-b-I9_HYPTENS | T | C | 0.2144 | 0.0668 | 0.0111 | 1.87E-09 | 218754 | 0.000165531 | 36.21620975 |
| rs6860901 | Hypertension || id:finn-b-I9_HYPTENS | finn-b-I9_HYPTENS | T | C | 0.2979 | 0.0682 | 0.01 | 7.68E-12 | 218754 | 0.000212579 | 46.51197475 |
| rs6918791 | Hypertension || id:finn-b-I9_HYPTENS | finn-b-I9_HYPTENS | G | C | 0.728 | 0.0574 | 0.0103 | 2.15E-08 | 218754 | 0.000141949 | 31.05598904 |
| rs6961048 | Hypertension || id:finn-b-I9_HYPTENS | finn-b-I9_HYPTENS | G | C | 0.1355 | 0.0735 | 0.0133 | 3.39E-08 | 218754 | 0.00013959 | 30.53988699 |
| rs7123467 | Hypertension || id:finn-b-I9_HYPTENS | finn-b-I9_HYPTENS | G | C | 0.202 | 0.0682 | 0.0114 | 2.47E-09 | 218754 | 0.000163581 | 35.78945426 |
| rs7134677 | Hypertension || id:finn-b-I9_HYPTENS | finn-b-I9_HYPTENS | T | C | 0.3819 | -0.0748 | 0.0094 | 2.13E-15 | 218754 | 0.000289378 | 63.32038079 |
| rs72779268 | Hypertension || id:finn-b-I9_HYPTENS | finn-b-I9_HYPTENS | A | C | 0.06436 | -0.1222 | 0.0187 | 6.32E-11 | 218754 | 0.000195172 | 42.70268945 |
| rs7310615 | Hypertension || id:finn-b-I9_HYPTENS | finn-b-I9_HYPTENS | G | C | 0.5863 | -0.0816 | 0.0093 | 1.37E-18 | 218754 | 0.000351808 | 76.98576856 |
| rs7483477 | Hypertension || id:finn-b-I9_HYPTENS | finn-b-I9_HYPTENS | G | T | 0.2348 | 0.0759 | 0.0109 | 3.12E-12 | 218754 | 0.000221604 | 48.48714191 |
| rs78412528 | Hypertension || id:finn-b-I9_HYPTENS | finn-b-I9_HYPTENS | A | G | 0.1674 | 0.1406 | 0.0122 | 1.03E-30 | 218754 | 0.00060678 | 132.8149641 |
| rs79873333 | Hypertension || id:finn-b-I9_HYPTENS | finn-b-I9_HYPTENS | T | C | 0.04758 | -0.1364 | 0.0215 | 2.11E-10 | 218754 | 0.000183957 | 40.24832861 |
| rs9899012 | Hypertension || id:finn-b-I9_HYPTENS | finn-b-I9_HYPTENS | A | G | 0.08387 | -0.1068 | 0.0166 | 1.41E-10 | 218754 | 0.000189186 | 41.39256683 |

**Supplementary Table 9.** MVMR analysis for Nap-Hypertension/Type 2 diabetes-SAP

| **(1)MVMR analysis results in different method** | | | | | | | | | | | | | |
| --- | --- | --- | --- | --- | --- | --- | --- | --- | --- | --- | --- | --- | --- |
| **Multivariable inverse-variance weighted method(variants uncorrelated, random-effect model)** | | | | | | | | | | | | | |
| exposure | outcome | nsnp | b | se | pval | | lo_ci | up_ci | or | or_lci95 | | | or_uci95 |
| Hypertension | Stable angina pectoris | 117 | 0.236582441 | 0.037273705 | 2.19E-10 | | 0.16352598 | 0.309638902 | 1.266911997 | 1.17765595 | | | 1.362932873 |
| Type 2 diabetes, definitions combined | Stable angina pectoris | 117 | 0.056905885 | 0.028902413 | 0.048964881 | | 0.000257155 | 0.113554615 | 1.05855618 | 1.000257188 | | | 1.12025307 |
| Nap during day | Stable angina pectoris | 117 | 0.164684031 | 0.253417269 | 0.51578703 | | -0.332013816 | 0.661381878 | 1.179020526 | 0.71747741 | | | 1.93746783 |
| Residual standard error = 1.776076; Heterogeneity test statistic = 359.6070 on 114 degrees of freedom, (p-value = 3.09e-27) | | | | | | | | | | | | | |
| **Multivariable MR-Egger method (variants uncorrelated, random-effect model)** | | | | | | | | | | | | | |
| Exposure | outcome | b | se | p-value | | 95% CI, L | 95%CI, U | or | or_lci95 | | or_uci95 | alpha | |
| Hypertension | Stable angina pectoris | 0.27869748 | 0.05116323 | 5.12E-08 | | 0.178419381 | 0.3789756 | 1.321407531 | 1.195326513 | | 1.460787392 | 0.05 | |
| T2DM | Stable angina pectoris | 0.06642976 | 0.0299206 | 2.64E-02 | | 0.007786453 | 0.1250731 | 1.068685897 | 1.007816846 | | 1.133231289 | 0.05 | |
| Nap during day | Stable angina pectoris | 0.20076209 | 0.25471552 | 4.31E-01 | | -0.298471557 | 0.6999953 | 1.222333932 | 0.741951385 | | 2.013743243 | 0.05 | |
| (intercept) |  | -0.003092605 | 0.002579202 | 2.31E-01 | | -0.008147747 | 0.001962538 | 0.996912172 | 0.991885356 | | 1.001964465 | 0.05 | |
| Residual standard error = 1.772676; Heterogeneity test statistic = 355.0891 on 113 degrees of freedom, (p-value = 8.210017e-27) | | | | | | | | | | | | | |
| **Multivariable median method** | | | | | | | | | | | | | |
| Exposure | outcome | b | se | p-value | | 95% CI, L | 95%CI, U | or | or_lci95 | | or_uci95 | | alpha |
| Hypertension | Stable angina pectoris | 0.2072196 | 0.03688296 | 1.93E-08 | | 0.134930321 | 0.2795089 | 1.230252706 | 1.144457037 | | 1.322480183 | | 0.05 |
| T2DM | Stable angina pectoris | 0.06838982 | 0.03071361 | 2.60E-02 | | 0.008192246 | 0.1285874 | 1.07078264 | 1.008225894 | | 1.13722081 | | 0.05 |
| Nap during day | Stable angina pectoris | 0.05714722 | 0.22686355 | 8.01E-01 | | -0.38749717 | 0.5017916 | 1.058811677 | 0.678753555 | | 1.651677767 | | 0.05 |
| **(2)LASSO regression** | | | | | | | | | | | | | |
| exposure | outcome | nsnp | b | se | | pval | lo_ci | up_ci | or | | or_lci95 | | or_uci95 |
| Hypertension | Stable angina pectoris | 117 | 0.236582441 | 0.037273705 | | 2.19E-10 | 0.16352598 | 0.309638902 | 1.266911997 | | 1.17765595 | | 1.362932873 |
| Type 2 diabetes, definitions combined | Stable angina pectoris | 117 | 0.056905885 | 0.028902413 | | 0.048964881 | 0.000257155 | 0.113554615 | 1.05855618 | | 1.000257188 | | 1.12025307 |
| Nap during day | Stable angina pectoris | 117 | 0.164684031 | 0.253417269 | | 0.51578703 | -0.332013816 | 0.661381878 | 1.179020526 | | 0.71747741 | | 1.93746783 |
| **Multivariable MR-Lasso method** | | | | | | | | | | | | | |
| Exposure | Estimate | Std Error | | 95% CI, L | | 95%CI, U | p-value | alpha | | | RegEstimate | | |
| Hypertension | 0.18974433 | 0.02574037 | | 0.13929413 | | 0.2401945 | 1.69E-13 | 0.05 | | | 0.20817043 | | |
| T2DM | 0.07886789 | 0.01780989 | | 0.04396114 | | 0.1137746 | 9.50E-06 | 0.05 | | | 0.07011068 | | |
| Nap during day | 0.20789084 | 0.15255247 | | -0.09110652 | | 0.5068882 | 1.73E-01 | 0.05 | | | 0.20254549 | | |
| Orientated to exposure : 1; Number of variants : 117; Number of valid instruments : 96; Tuning parameter : 0.1962887;Lambda: 0.1962887 | | | | | | | | | | | | | |
| **(3)Instrument stenghth and validity analysis** | | | | | | | | | | | | | |
| **Q-Statistics for instrument strength** | | | | | | | | | | | | | |
| Hypertension | | | | | | 2160.805 | | | | | | | |
| T2DM | | | | | | 2418.373 | | | | | | | |
| Nap | | | | | | 1886.311 | | | | | | | |
| Q-Statistic for instrument validity(pleiotrophy): 337.3439; Pvalue: 3.49E-24 | | | | | | | | | | | | | |

**Supplementary Table 10.** Calculation of effect in Nap-Hypertension/T2DM-SAP

| **(1) Effect of Hypertension** | | | | | | | | | | |
| --- | --- | --- | --- | --- | --- | --- | --- | --- | --- | --- |
| exposure_name | effect_value | mediator_ratio | SE | low_CI | up_CI | OR | or_low_CI | or_up_CI | Z-score | P-value |
| Hypertension | 0.121277337 | 0.276711827 | 0.040804239 | 0.041301028 | 0.201253646 | 1.128937965 | 1.042165779 | 1.222934925 | 2.972174917 | 0.002956982 |
| Type 2 diabetes | 0.033758694 | 0.077025355 | 0.020673766 | -0.006761888 | 0.074279276 | 1.034334985 | 0.993260922 | 1.077107574 | 1.632924248 | 0.10248493 |
| **(2) Total mediators effect** | | | | | | | | | | |
| indirect_effect | indirect_ratio |  |  |  |  |  |  |  |  |  |
| 0.273596249 | 0.624249508 |  |  |  |  |  |  |  |  |  |
| **(3) Direct effect of Nap during day** | | | | | | | | | | |
| direct_effect | direct_ratio |  |  |  |  |  |  |  |  |  |
| 0.164684031 | 0.375750492 |  |  |  |  |  |  |  |  |  |

**Supplementary Table 11.** MVMR analysis for Narcolepsy-Hypertension -SAP

| **(1) MVMR analysis result with IVW** | | | | | | | | | | |
| --- | --- | --- | --- | --- | --- | --- | --- | --- | --- | --- |
| exposure | outcome | nsnp | b | se | pval | lo_ci | up_ci | or | or_lci95 | or_uci95 |
| Hypertension | Stable angina pectoris | 67 | 0.303097691 | 0.053414803 | 1.39E-08 | 0.198404678 | 0.407790705 | 1.354046737 | 1.219455781 | 1.503492454 |
| Daytime dozing / sleeping (narcolepsy) | Stable angina pectoris | 67 | 0.210946418 | 0.849895824 | 0.803977596 | -1.454849397 | 1.876742233 | 1.234846188 | 0.233435517 | 6.532189806 |
| **(2) LASSO regression** | | | | | | | | | | |
| exposure | b |  |  |  |  |  |  |  |  |  |
| Hypertension | 0.28601414 |  |  |  |  |  |  |  |  |  |
| exposure | outcome | nsnp | b | se | pval | lo_ci | up_ci | or | or_lci95 | or_uci95 |
| Hypertension | Stable angina pectoris | 54 | 0.305035742 | 0.057973943 | 1.43E-07 | 0.191406814 | 0.41866467 | 1.356673492 | 1.210951985 | 1.51993059 |

**Supplementary Table 12.** SNPs and F value for East Asian population

| Sleep duration | samplesize.exposure | SNP | effect_allele.exposure | other_allele.exposure | pval.exposure | eaf.exposure | beta.exposure | se.exposure | R2 | F |
| --- | --- | --- | --- | --- | --- | --- | --- | --- | --- | --- |
| 2631 | rs11695017 | G | T | 1.98E-06 | 0.5921 | -0.105 | 0.02208 | 0.008522023 | 22.59696943 |
| 2631 | rs34546729 | C | A | 3.61E-06 | 0.07096 | 0.2005 | 0.04327 | 0.008094766 | 21.45481142 |
| 2631 | rs78064350 | G | T | 5.64E-06 | 0.01384 | 0.4524 | 0.09965 | 0.00777286 | 20.5949302 |
| 2631 | rs4722863 | G | C | 2.22E-07 | 0.5229 | 0.1154 | 0.02227 | 0.01010277 | 26.83125097 |
| 2631 | rs2225988 | T | G | 1.53E-06 | 0.6809 | 0.1185 | 0.02465 | 0.008707308 | 23.09258716 |
| 2631 | rs78358954 | G | A | 8.49E-06 | 0.1264 | -0.1595 | 0.03583 | 0.007475635 | 19.80147293 |
| 2631 | rs12448463 | C | T | 8.13E-06 | 0.02477 | 0.3349 | 0.07506 | 0.007509632 | 19.89220439 |
| 2631 | rs67141127 | A | G | 5.18E-06 | 0.156 | -0.1416 | 0.03107 | 0.007832639 | 20.75456992 |
| 2631 | rs111587280 | T | C | 8.03E-08 | 0.1133 | 0.1859 | 0.03464 | 0.010828141 | 28.77880463 |
| 2631 | rs75015256 | T | C | 3.23E-07 | 0.01379 | -0.5619 | 0.11 | 0.009820325 | 26.07368605 |
| Getting up in morning | 2640 | rs76932579 | A | G | 7.96E-07 | 0.03797 | -0.32 | 0.06483 | 0.009144382 | 24.34550445 |
| 2640 | rs116643249 | A | G | 7.31E-06 | 0.2433 | 0.1144 | 0.02551 | 0.007560167 | 20.09564713 |
| 2640 | rs11937816 | C | A | 1.95E-06 | 0.3566 | -0.1096 | 0.02303 | 0.008505884 | 22.63101835 |
| 2640 | rs117279367 | G | C | 1.51E-06 | 0.04192 | 0.2684 | 0.05581 | 0.008684582 | 23.11063307 |
| 2640 | rs74502433 | G | A | 6.13E-06 | 0.04621 | -0.2293 | 0.05071 | 0.007685398 | 20.43110015 |
| 2640 | rs73705177 | C | T | 8.15E-07 | 0.4954 | 0.1102 | 0.02235 | 0.009124796 | 24.29287964 |
| 2640 | rs5808692 | A | T | 4.60E-07 | 0.09276 | -0.2102 | 0.04169 | 0.009537526 | 25.40226823 |
| Chronotype | 2343 | rs2618037 | C | T | 6.24E-06 | 0.6504 | -0.1522 | 0.03368 | 0.008640602 | 20.40395064 |
| 2343 | rs74600259 | A | G | 5.41E-06 | 0.102 | -0.2224 | 0.04889 | 0.008754642 | 20.67562356 |
| 2343 | rs2240681 | T | C | 1.55E-06 | 0.7454 | 0.1621 | 0.03373 | 0.009761151 | 23.07610319 |
| 2343 | rs78142772 | A | G | 6.24E-06 | 0.03523 | -0.4088 | 0.09049 | 0.008635385 | 20.39152579 |
| 2343 | rs1458290 | A | G | 7.67E-06 | 0.07407 | 0.2651 | 0.05924 | 0.008474633 | 20.00868195 |
| 2343 | rs9385754 | G | C | 3.02E-06 | 0.1595 | 0.1912 | 0.04095 | 0.00921878 | 21.78196665 |
| 2343 | rs73397605 | C | T | 2.67E-06 | 0.1297 | -0.2026 | 0.04316 | 0.00931705 | 22.01634059 |
| 2343 | rs5999832 | C | T | 8.97E-06 | 0.4973 | 0.1318 | 0.02967 | 0.008351819 | 19.71627436 |
| samplesize.exposure | SNP | effect_allele.exposure | other_allele.exposure | pval.exposure | eaf.exposure | beta.exposure | se.exposure | R2 | F |
| 2606 | rs111064376 | A | T | 6.42E-06 | 0.2993 | 0.08349 | 0.0185 | 0.00775479 | 20.35129426 |
| 2606 | rs7534377 | G | A | 8.74E-07 | 0.7569 | 0.0961 | 0.01954 | 0.009196252 | 24.1693085 |
| 2606 | rs10931663 | C | T | 6.48E-07 | 0.6276 | 0.08621 | 0.01732 | 0.009417503 | 24.75631975 |
| 2606 | rs60858140 | C | T | 2.36E-06 | 0.0957 | -0.1356 | 0.02874 | 0.008469882 | 22.24397611 |
| 2606 | rs3998154 | A | G | 6.45E-07 | 0.6135 | -0.0867 | 0.01742 | 0.009415836 | 24.75189546 |
| 2606 | rs10976661 | G | C | 7.29E-06 | 0.938 | -0.1664 | 0.03711 | 0.007656186 | 20.09052583 |
| 2606 | rs59463025 | G | A | 3.23E-06 | 0.06799 | -0.158 | 0.03394 | 0.008247445 | 21.65494407 |
| 2606 | rs56157536 | A | G | 6.76E-06 | 0.1026 | 0.1295 | 0.02877 | 0.007714751 | 20.24540092 |
| 2606 | rs117042515 | T | C | 7.67E-06 | 0.3583 | 0.07869 | 0.01759 | 0.007620976 | 19.99742056 |
| 2606 | rs7110341 | A | C | 5.74E-06 | 0.6169 | 0.08001 | 0.01764 | 0.007832528 | 20.55691536 |
| 2606 | rs58786955 | C | G | 2.91E-06 | 0.01076 | -0.3748 | 0.08014 | 0.008323312 | 21.85581756 |
| 2606 | rs10746042 | A | G | 1.65E-06 | 0.7296 | -0.09468 | 0.01976 | 0.008732908 | 22.94083316 |
| 2606 | rs8124675 | A | G | 1.34E-06 | 0.5215 | 0.08741 | 0.01808 | 0.008889413 | 23.35564991 |
| Insomnia | 2654 | rs10911498 | C | T | 3.13E-06 | 0.2645 | 0.09435 | 0.02024 | 0.008121205 | 21.71377803 |
| 2654 | rs12052345 | A | G | 3.09E-06 | 0.6833 | 0.09035 | 0.01937 | 0.008131121 | 21.74050729 |
| 2654 | rs1997507 | C | T | 9.19E-07 | 0.3479 | 0.09568 | 0.01949 | 0.00899895 | 24.08192815 |
| 2654 | rs1368952 | T | C | 5.64E-06 | 0.2208 | 0.1035 | 0.02279 | 0.007711328 | 20.60936688 |
| 2654 | rs78851593 | G | T | 7.52E-07 | 0.1569 | 0.1253 | 0.02533 | 0.009135767 | 24.45143565 |
| 2654 | rs10489091 | A | G | 8.52E-06 | 0.03259 | 0.2285 | 0.05132 | 0.007414233 | 19.80941793 |
| 2654 | rs4270579 | A | G | 5.31E-07 | 0.892 | -0.152 | 0.03032 | 0.009380687 | 25.11316113 |
| 2654 | rs10039402 | G | C | 1.39E-06 | 0.04088 | 0.2206 | 0.04572 | 0.008695702 | 23.26329211 |
| 2654 | rs77137599 | A | T | 9.78E-06 | 0.03498 | 0.2441 | 0.05521 | 0.007311594 | 19.53316712 |
| 2654 | rs12684860 | C | A | 5.90E-06 | 0.6018 | -0.08651 | 0.0191 | 0.007670451 | 20.49927449 |
| 2654 | rs73293345 | G | C | 8.49E-06 | 0.01228 | 0.3946 | 0.08862 | 0.007415107 | 19.81176973 |
| 2654 | rs66956722 | C | T | 9.63E-06 | 0.2363 | 0.09772 | 0.02208 | 0.007326127 | 19.57227818 |
| 2654 | rs634606 | C | T | 8.39E-06 | 0.6835 | 0.08727 | 0.01959 | 0.007422065 | 19.83050076 |
| 2654 | rs2648266 | G | A | 3.21E-06 | 0.1228 | -0.1546 | 0.03319 | 0.008109004 | 21.68088848 |
| 2654 | rs12103133 | G | T | 4.02E-06 | 0.654 | 0.09898 | 0.02147 | 0.007944487 | 21.23750095 |
| 2654 | rs17712249 | C | A | 9.77E-06 | 0.1036 | 0.1321 | 0.02986 | 0.00732039 | 19.55683761 |
| 2654 | rs3848529 | C | T | 6.82E-06 | 0.4009 | -0.08457 | 0.0188 | 0.007566888 | 20.22039168 |
| 2654 | rs3848824 | A | G | 5.20E-06 | 0.6079 | 0.08533 | 0.01873 | 0.007759681 | 20.73960772 |
| 2654 | rs118087832 | C | T | 8.08E-06 | 0.03762 | -0.2353 | 0.05273 | 0.007446996 | 19.89760994 |
| Snoring | 2348 | rs17804835 | C | G | 0 | 0.64 | 0.35 | 0.07 | 0.010535188 | 24.97870528 |
| 2348 | rs28633142 | G | A | 0 | 0.06 | 0.53 | 0.12 | 0.008239446 | 19.49032865 |
| 2348 | rs115203891 | A | G | 0 | 0.06 | -0.75 | 0.17 | 0.008221316 | 19.44708889 |
| 2348 | rs7673152 | T | A | 0 | 0.61 | -0.33 | 0.07 | 0.009376534 | 22.20555923 |
| 2348 | rs2101899 | A | G | 0 | 0.12 | -0.69 | 0.15 | 0.008931436 | 21.14197615 |
| 2348 | rs117111839 | A | G | 0 | 0.01 | 0.9 | 0.2 | 0.008550618 | 20.23275128 |
| 2348 | rs9449212 | A | G | 0 | 0.18 | 0.34 | 0.08 | 0.007633991 | 18.04711457 |
| 2348 | rs142882620 | T | C | 0 | 0.21 | 0.34 | 0.08 | 0.007633991 | 18.04711457 |
| 2348 | rs79112777 | A | G | 0 | 0.05 | -0.84 | 0.19 | 0.008255683 | 19.52905756 |
| 2348 | rs200266353 | A | T | 0 | 0.16 | -0.45 | 0.1 | 0.008550618 | 20.23275128 |
| 2348 | rs11250457 | A | G | 0 | 0.38 | 0.32 | 0.07 | 0.008821806 | 20.88015854 |
| 2348 | rs11196925 | G | A | 0 | 0.18 | 0.36 | 0.08 | 0.008550618 | 20.23275128 |
| 2348 | rs58366373 | G | C | 0 | 0.06 | -0.81 | 0.18 | 0.008550618 | 20.23275128 |
| 2348 | rs79317598 | A | C | 0 | 0.08 | -0.63 | 0.14 | 0.008550618 | 20.23275128 |
| 2348 | rs11176567 | G | T | 0 | 0.14 | -0.47 | 0.1 | 0.009320321 | 22.07118399 |
| 2348 | rs141381241 | G | A | 0 | 0.04 | -1.08 | 0.24 | 0.008550618 | 20.23275128 |
| 2348 | rs117728441 | T | C | 0 | 0.02 | 0.75 | 0.17 | 0.008221316 | 19.44708889 |
| 2348 | rs150717255 | A | G | 0 | 0.02 | -1.77 | 0.4 | 0.00827031 | 19.56394644 |
| Narcolepsy | 2582 | rs9439687 | G | C | 7.81E-06 | 0.09334 | 0.1162 | 0.02599 | 0.007682352 | 19.97391352 |
| 2582 | rs11207271 | G | A | 7.76E-06 | 0.4523 | 0.07117 | 0.01591 | 0.007690323 | 19.99479889 |
| 2582 | rs3749073 | A | C | 5.22E-06 | 0.1406 | 0.1004 | 0.02205 | 0.007965641 | 20.71637224 |
| 2582 | rs1705993 | G | A | 6.25E-06 | 0.4019 | 0.07074 | 0.01566 | 0.007841003 | 20.38966374 |
| 2582 | rs74861687 | C | A | 1.69E-06 | 0.04573 | 0.1787 | 0.03733 | 0.008797098 | 22.8979495 |
| 2582 | rs35003 | G | A | 6.19E-06 | 0.8699 | -0.1105 | 0.02446 | 0.007842169 | 20.39271824 |
| 2582 | rs10940409 | A | G | 4.87E-06 | 0.1263 | 0.1091 | 0.02387 | 0.008025809 | 20.87411786 |
| 2582 | rs2460499 | T | C | 5.01E-06 | 0.4122 | 0.07917 | 0.01734 | 0.008008932 | 20.82987058 |
| 2582 | rs990124 | C | G | 2.06E-06 | 0.443 | -0.07361 | 0.0155 | 0.008659184 | 22.53583775 |
| 2582 | rs304382 | T | C | 1.82E-06 | 0.1163 | 0.1176 | 0.02465 | 0.008738019 | 22.74281739 |
| 2582 | rs11979872 | C | A | 6.09E-06 | 0.09183 | 0.1264 | 0.02795 | 0.007858648 | 20.43591048 |
| 2582 | rs6966084 | G | T | 5.11E-06 | 0.08555 | 0.1348 | 0.02955 | 0.007995072 | 20.79353281 |
| 2582 | rs10504575 | C | T | 8.56E-06 | 0.2768 | 0.07561 | 0.01699 | 0.007611969 | 19.78951663 |
| 2582 | rs4977290 | G | C | 7.70E-06 | 0.798 | -0.08664 | 0.01937 | 0.007688989 | 19.99130356 |
| 2582 | rs2280133 | A | G | 4.92E-07 | 0.02448 | 0.2767 | 0.05501 | 0.009703846 | 25.28124727 |
| 2582 | rs2457684 | C | T | 6.05E-06 | 0.3189 | 0.0751 | 0.0166 | 0.007864632 | 20.45159416 |
| 2582 | rs9509024 | A | G | 1.17E-06 | 0.6592 | -0.08033 | 0.01653 | 0.009063572 | 23.59789665 |
| 2582 | rs55637365 | T | C | 1.70E-06 | 0.5908 | 0.07769 | 0.01623 | 0.008796297 | 22.89584473 |
| 2582 | rs8043380 | T | C | 5.74E-06 | 0.1911 | 0.08838 | 0.01949 | 0.007901019 | 20.54696988 |
| 2582 | rs149937242 | T | C | 2.51E-06 | 0.01125 | 0.4582 | 0.09735 | 0.008506908 | 22.1361315 |
| 2582 | rs2867598 | C | T | 4.36E-06 | 0.5457 | -0.07043 | 0.01533 | 0.008108472 | 21.09087196 |
| 2582 | rs11669775 | C | G | 5.03E-07 | 0.7792 | 0.09229 | 0.01837 | 0.009680771 | 25.22054385 |

**Supplementary Table 13.** Results of sleep traits on stable angina pectoris or unstable angina pectoris in East Asian population

| exposure | outcome | method | nsnp | outlier | pval | or | or_lci95 | or_uci95 | Heterogeneity | | Horizontal Pleiotrophy | | MR-PRESSO |
| --- | --- | --- | --- | --- | --- | --- | --- | --- | --- | --- | --- | --- | --- |
| Q | Q_pval | Egger intercept | Pleiotrophy-pval | pval |
| Sleep duration | Unstable angina pectoris | MR Egger | 8 |  | 0.823780767 | 1.034276907 | 0.778602691 | 1.373908326 | 4.527261747 | 0.605705459 | 0.006442917 | 0.817102028 | 0.738 |
| Weighted median | 8 | 0.658268142 | 1.038589875 | 0.878162693 | 1.228324702 |  |  |  |  |  |
| Inverse variance weighted | 8 | 0.344944969 | 1.066698085 | 0.932925223 | 1.219652741 | 4.585654037 | 0.710380047 |  |  |  |
| Simple mode | 8 | 0.892830267 | 0.981453429 | 0.754748806 | 1.276253538 |  |  |  |  |  |
| Weighted mode | 8 | 0.827822084 | 1.024916249 | 0.827757083 | 1.269035734 |  |  |  |  |  |
| Sleep duration | Stable angina pectoris | MR Egger | 8 |  | 0.957967439 | 0.993456083 | 0.786018862 | 1.255637793 | 11.01049753 | 0.088052535 | 0.006711689 | 0.770676723 | 0.141333333 |
| Weighted median | 8 | 0.776336412 | 0.98408044 | 0.880943923 | 1.099291666 |  |  |  |  |  |
| Inverse variance weighted | 8 | 0.62724929 | 1.025890556 | 0.925325982 | 1.137384503 | 11.18119478 | 0.130908354 |  |  |  |
| Simple mode | 8 | 0.611990058 | 0.955420954 | 0.807346466 | 1.130653614 |  |  |  |  |  |
| Weighted mode | 8 | 0.841405186 | 0.986332814 | 0.866192899 | 1.12313599 |  |  |  |  |  |
| Sleeplessness / insomnia | Unstable angina pectoris | MR Egger | 14 |  | 0.613041193 | 1.061221271 | 0.847995503 | 1.328061979 | 11.43968873 | 0.491659669 | -0.005380955 | 0.716452127 | 0.606333333 |
| Weighted median | 14 | 0.297993824 | 1.081609977 | 0.933053451 | 1.253818998 |  |  |  |  |  |
| Inverse variance weighted | 14 | 0.681134406 | 1.0218659 | 0.921693481 | 1.132925358 | 11.57799764 | 0.562513783 |  |  |  |
| Simple mode | 14 | 0.704562304 | 1.048625885 | 0.824812651 | 1.333170928 |  |  |  |  |  |
| Weighted mode | 14 | 0.488927695 | 1.064135031 | 0.896810174 | 1.262678989 |  |  |  |  |  |
| Sleeplessness / insomnia | Stable angina pectoris | MR Egger | 13 | rs12684860 | 0.678438615 | 1.034250649 | 0.885743069 | 1.207657663 | 13.68139593 | 0.251127083 | -0.017320295 | 0.118934302 | 0.161333333 |
| Weighted median | 13 | 0.079121172 | 0.915063899 | 0.828742926 | 1.010375973 |  |  |  |  |  |
| Inverse variance weighted | 13 | 0.031586648 | 0.91871043 | 0.850364402 | 0.992549609 | 17.23802734 | 0.140860768 |  |  |  |
| Simple mode | 13 | 0.205964234 | 0.885858743 | 0.74167211 | 1.058076342 |  |  |  |  |  |
| Weighted mode | 13 | 0.944319602 | 0.995737317 | 0.885438946 | 1.119775463 |  |  |  |  |  |
| Nap during day | Unstable angina pectoris | MR Egger | 9 |  | 0.330654166 | 1.42667052 | 0.732728585 | 2.777820892 | 2.788848644 | 0.903824326 | -0.03386884 | 0.36626321 | 0.880333333 |
| Weighted median | 9 | 0.950521491 | 1.006388059 | 0.823026689 | 1.230600342 |  |  |  |  |  |
| Inverse variance weighted | 9 | 0.651770266 | 1.036951409 | 0.88576834 | 1.213938426 | 3.721842891 | 0.881307515 |  |  |  |
| Simple mode | 9 | 0.355486013 | 1.169047592 | 0.855575031 | 1.597372788 |  |  |  |  |  |
| Weighted mode | 9 | 0.894091927 | 0.978340886 | 0.715907285 | 1.336976045 |  |  |  |  |  |
| Nap during day | Stable angina pectoris | MR Egger | 9 |  | 0.6804728 | 0.914874298 | 0.609585514 | 1.373055891 | 5.394000961 | 0.611998214 | 0.00768259 | 0.729772317 | 0.702333333 |
| Weighted median | 9 | 0.661939555 | 0.972442284 | 0.857948259 | 1.102215647 |  |  |  |  |  |
| Inverse variance weighted | 9 | 0.734565356 | 0.983543126 | 0.893581587 | 1.082561564 | 5.523290672 | 0.700458239 |  |  |  |
| Simple mode | 9 | 0.358160514 | 0.899586521 | 0.727191014 | 1.112851909 |  |  |  |  |  |
| Weighted mode | 9 | 0.374156619 | 1.098205664 | 0.903567944 | 1.334770327 |  |  |  |  |  |
| Morning/evening person (chronotype) | Unstable angina pectoris | MR Egger | 8 |  | 0.36029424 | 1.146316496 | 0.874826854 | 1.502058954 | 2.996653631 | 0.809266718 | -0.003940361 | 0.891716101 | 0.904 |
| Weighted median | 8 | 0.176377026 | 1.088079194 | 0.962749736 | 1.229723872 |  |  |  |  |  |
| Inverse variance weighted | 8 | 0.010479585 | 1.125355026 | 1.028051078 | 1.23186869 | 3.016822151 | 0.883441694 |  |  |  |
| Simple mode | 8 | 0.446037655 | 1.075441462 | 0.901367239 | 1.28313332 |  |  |  |  |  |
| Weighted mode | 8 | 0.369708064 | 1.084069953 | 0.919125163 | 1.278615482 |  |  |  |  |  |
| Morning/evening person (chronotype) | Stable angina pectoris | MR Egger | 8 |  | 0.663770883 | 1.048234305 | 0.856465207 | 1.282941969 | 9.028090152 | 0.172004453 | 0.000315401 | 0.988357579 | 0.291666667 |
| Weighted median | 8 | 0.168055127 | 1.056122905 | 0.977228027 | 1.14138723 |  |  |  |  |  |
| Inverse variance weighted | 8 | 0.128074516 | 1.049784357 | 0.986105016 | 1.117575895 | 9.028438264 | 0.250620741 |  |  |  |
| Simple mode | 8 | 0.334394823 | 1.06908034 | 0.942232619 | 1.213004889 |  |  |  |  |  |
| Weighted mode | 8 | 0.191886434 | 1.079262701 | 0.973130475 | 1.196969992 |  |  |  |  |  |
| Getting up in morning | Unstable angina pectoris | MR Egger | 4 |  | 0.904933993 | 1.02985035 | 0.672030149 | 1.578190719 | 1.865454621 | 0.393479106 | -0.021940678 | 0.668663248 | 0.588 |
| Weighted median | 4 | 0.531355385 | 0.937423935 | 0.765701304 | 1.147658531 |  |  |  |  |  |
| Inverse variance weighted | 4 | 0.404192839 | 0.932098181 | 0.790144206 | 1.099555008 | 2.112100488 | 0.549468634 |  |  |  |
| Simple mode | 4 | 0.292141401 | 0.823402217 | 0.610759094 | 1.110079599 |  |  |  |  |  |
| Weighted mode | 4 | 0.882409734 | 0.978180392 | 0.747643637 | 1.279803415 |  |  |  |  |  |
| Getting up in morning | Stable angina pectoris | MR Egger | 4 |  | 0.780205739 | 0.953013396 | 0.708808695 | 1.281353545 | 2.594146189 | 0.273330636 | 0.005231268 | 0.880095726 | 0.468666667 |
| Weighted median | 4 | 0.326064818 | 0.938721674 | 0.827420681 | 1.064994388 |  |  |  |  |  |
| Inverse variance weighted | 4 | 0.635848177 | 0.97594852 | 0.882392628 | 1.079423698 | 2.631986348 | 0.451909501 |  |  |  |
| Simple mode | 4 | 0.426350088 | 0.917793489 | 0.764180981 | 1.102284551 |  |  |  |  |  |
| Weighted mode | 4 | 0.429405919 | 0.916544885 | 0.759870572 | 1.105523172 |  |  |  |  |  |
| Daytime dozing / sleeping (narcolepsy) | Unstable angina pectoris | MR Egger | 18 |  | 0.12416238 | 1.310292217 | 0.945397397 | 1.81602541 | 15.5357237 | 0.485805895 | -0.02708732 | 0.118286297 | 0.388666667 |
| Weighted median | 18 | 0.476560361 | 1.068746273 | 0.889961221 | 1.283447603 |  |  |  |  |  |
| Inverse variance weighted | 18 | 0.808160634 | 1.016020128 | 0.893682793 | 1.155104371 | 18.26057367 | 0.372583298 |  |  |  |
| Simple mode | 18 | 0.206295451 | 1.250408345 | 0.895960243 | 1.745078583 |  |  |  |  |  |
| Weighted mode | 18 | 0.189674928 | 1.209292388 | 0.920724357 | 1.588301719 |  |  |  |  |  |
| Daytime dozing / sleeping (narcolepsy) | Stable angina pectoris | MR Egger | 18 |  | 0.19568571 | 1.146844873 | 0.940020278 | 1.399175309 | 14.01721961 | 0.597430953 | -0.013520087 | 0.195047424 | 0.548 |
| Weighted median | 18 | 0.540945699 | 1.032952725 | 0.930980832 | 1.14609377 |  |  |  |  |  |
| Inverse variance weighted | 18 | 0.794229514 | 1.010079665 | 0.936751548 | 1.089147844 | 15.84625851 | 0.534758867 |  |  |  |
| Simple mode | 18 | 0.852533064 | 1.017808449 | 0.847336389 | 1.222577068 |  |  |  |  |  |
| Weighted mode | 18 | 0.59862059 | 1.051027817 | 0.876271306 | 1.260636363 |  |  |  |  |  |
| Snoring | Unstable angina pectoris | MR Egger | 14 |  | 0.763528827 | 1.011974041 | 0.93810077 | 1.091664662 | 6.173141207 | 0.907103566 | -0.00537856 | 0.77208477 | 0.940333333 |
| Weighted median | 14 | 0.462811168 | 1.017361391 | 0.971673202 | 1.065197844 |  |  |  |  |  |
| Inverse variance weighted | 14 | 0.924143344 | 1.001634152 | 0.968527478 | 1.035872495 | 6.260920302 | 0.936138976 |  |  |  |
| Simple mode | 14 | 0.539451485 | 1.022258134 | 0.954615333 | 1.094694014 |  |  |  |  |  |
| Weighted mode | 14 | 0.500924778 | 1.024477353 | 0.956684949 | 1.097073647 |  |  |  |  |  |
| Snoring | Stable angina pectoris | MR Egger | 14 |  | 0.924872637 | 1.0022664 | 0.9571333 | 1.049527726 | 8.324697295 | 0.759269544 | -0.004798766 | 0.671467297 | 0.816333333 |
| Weighted median | 14 | 0.571501136 | 0.991854105 | 0.964147414 | 1.020357003 |  |  |  |  |  |
| Inverse variance weighted | 14 | 0.508395294 | 0.993127873 | 0.973037182 | 1.013633385 | 8.513695007 | 0.808600571 |  |  |  |
| Simple mode | 14 | 0.669503745 | 0.989820615 | 0.945393319 | 1.036335703 |  |  |  |  |  |
| Weighted mode | 14 | 0.738946127 | 0.993197298 | 0.95492554 | 1.033002921 |  |  |  |  |  |

**Supplementary Table 14.** Reverse MR analysis results of sleep traits on stable angina pectoris or unstable angina pectoris in East Asian population

| exposure | outcome | method | nsnp | pval | or | or_lci95 | or_uci95 | Heterogeneity | | IVW_MRE | | Horizontal Pleiotrophy | | MR-PRESSO |
| --- | --- | --- | --- | --- | --- | --- | --- | --- | --- | --- | --- | --- | --- | --- |
| Q | Q_pval | OR | pval | Egger intercept | Pleiotrophy-pval | pval |
| Stable angina pectoris | Sleep duration | MR Egger | 22 | 0.050373056 | 2.07398001 | 1.043752907 | 4.121083688 | 22.15802754 | 0.331997588 |  |  | -0.057528703 | 0.055284076 | 0.169666667 |
| Weighted median | 22 | 0.62472248 | 1.050014438 | 0.86351534 | 1.276792976 |  |  |  |  |  |  |  |
| Inverse variance weighted | 22 | 0.681914915 | 1.032516514 | 0.886009665 | 1.203249122 | 26.74765886 | 0.179362577 |  |  |  |  |  |
| Simple mode | 22 | 0.934173469 | 1.018733321 | 0.659266934 | 1.574199352 |  |  |  |  |  |  |  |
| Weighted mode | 22 | 0.766776493 | 1.066211735 | 0.701802149 | 1.619840387 |  |  |  |  |  |  |  |
| Stable angina pectoris | Getting up in morning | MR Egger | 22 | 0.913540773 | 1.045285584 | 0.474638738 | 2.302007535 | 29.62262048 | 0.076203697 |  |  | -0.012647086 | 0.701360277 | 0.092666667 |
| Weighted median | 22 | 0.958244228 | 1.005552406 | 0.817304163 | 1.237159537 |  |  |  |  |  |  |  |
| Inverse variance weighted | 22 | 0.184828197 | 0.896750383 | 0.763336177 | 1.053482429 | 29.84678864 | 0.095110271 |  |  |  |  |  |
| Simple mode | 22 | 0.392225452 | 1.278023541 | 0.737063542 | 2.216015416 |  |  |  |  |  |  |  |
| Weighted mode | 22 | 0.285397773 | 1.283395421 | 0.821513938 | 2.004961489 |  |  |  |  |  |  |  |
| Stable angina pectoris | Morning/evening person (chronotype) | MR Egger | 22 | 0.162422938 | 1.972668981 | 0.787697362 | 4.940251289 | 22.81527947 | 0.2979555 |  |  | -0.03549336 | 0.359471904 | 0.307333333 |
| Weighted median | 22 | 0.017146479 | 1.373757949 | 1.058050332 | 1.783668363 |  |  |  |  |  |  |  |
| Inverse variance weighted | 22 | 0.010871528 | 1.283875834 | 1.05926467 | 1.556114543 | 23.81881544 | 0.301920044 |  |  |  |  |  |
| Simple mode | 22 | 0.034194832 | 1.768376198 | 1.079847774 | 2.895921495 |  |  |  |  |  |  |  |
| Weighted mode | 22 | 0.058291721 | 1.628962792 | 1.010450071 | 2.626077086 |  |  |  |  |  |  |  |
| Stable angina pectoris | Nap during day | MR Egger | 22 | 0.789346706 | 0.933728111 | 0.56839907 | 1.533866312 | 18.82135356 | 0.533464054 |  |  | 0.001716611 | 0.933899452 | 0.611666667 |
| Weighted median | 22 | 0.968141429 | 1.002885432 | 0.870649762 | 1.155205267 |  |  |  |  |  |  |  |
| Inverse variance weighted | 22 | 0.364880987 | 0.953357016 | 0.859771648 | 1.057129066 | 18.82840786 | 0.596146634 |  |  |  |  |  |
| Simple mode | 22 | 0.805888574 | 1.035594872 | 0.786238824 | 1.364034319 |  |  |  |  |  |  |  |
| Weighted mode | 22 | 0.748293377 | 1.044486539 | 0.803438555 | 1.357853843 |  |  |  |  |  |  |  |
| Stable angina pectoris | Sleeplessness / insomnia | MR Egger | 12 | 0.41374087 | 1.294014693 | 0.715585371 | 2.340005951 | 8.00618944 | 0.62823233 |  |  | -0.018944705 | 0.473531725 | 0.674666667 |
| Weighted median | 12 | 0.525572825 | 1.069067547 | 0.86985372 | 1.313905308 |  |  |  |  |  |  |  |
| Inverse variance weighted | 12 | 0.604924376 | 1.041022991 | 0.893941177 | 1.212304451 | 8.560919776 | 0.662349371 |  |  |  |  |  |
| Simple mode | 12 | 0.675744412 | 1.078203162 | 0.764761098 | 1.520111394 |  |  |  |  |  |  |  |
| Weighted mode | 12 | 0.610172068 | 1.081806903 | 0.806483814 | 1.451121715 |  |  |  |  |  |  |  |
| Stable angina pectoris | Snoring | MR Egger | 22 | 0.266183056 | 3.084374095 | 0.44770369 | 21.24924087 | 9.082908848 | 0.981926937 |  |  | -0.075925441 | 0.350387732 | 0.981666667 |
| Weighted median | 22 | 0.807427664 | 1.070762161 | 0.617912025 | 1.855493272 |  |  |  |  |  |  |  |
| Inverse variance weighted | 22 | 0.31519372 | 1.227905731 | 0.822553843 | 1.833013725 | 9.997226387 | 0.978947843 |  |  |  |  |  |
| Simple mode | 22 | 0.629582337 | 1.271894004 | 0.485506872 | 3.332011243 |  |  |  |  |  |  |  |
| Weighted mode | 22 | 0.861465076 | 1.081955769 | 0.451514525 | 2.592670271 |  |  |  |  |  |  |  |
| Stable angina pectoris | Daytime dozing / sleeping (narcolepsy) | MR Egger | 22 | 0.893804641 | 1.032242352 | 0.651612244 | 1.635212172 | 17.91981011 | 0.592690822 |  |  | -0.011326952 | 0.556357396 | 0.643333333 |
| Weighted median | 22 | 0.090872931 | 0.893152108 | 0.783497894 | 1.018152944 |  |  |  |  |  |  |  |
| Inverse variance weighted | 22 | 0.030037779 | 0.899748329 | 0.817851022 | 0.989846603 | 18.27776948 | 0.631364772 |  |  |  |  |  |
| Simple mode | 22 | 0.305066552 | 0.863203081 | 0.656153166 | 1.135587845 |  |  |  |  |  |  |  |
| Weighted mode | 22 | 0.292796472 | 0.867748673 | 0.670646602 | 1.122778758 |  |  |  |  |  |  |  |
| Unstable angina pectoris | Sleep duration | MR Egger | 9 | 0.383855083 | 1.281820552 | 0.75911739 | 2.164439847 | 9.113711222 | 0.244594857 |  |  | -0.03421666 | 0.385873918 | 0.251666667 |
| Weighted median | 9 | 0.514494072 | 1.059298618 | 0.890826418 | 1.259632111 |  |  |  |  |  |  |  |
| Inverse variance weighted | 9 | 0.884797538 | 1.01049952 | 0.877352147 | 1.163853402 | 10.22705576 | 0.249449918 |  |  |  |  |  |
| Simple mode | 9 | 0.61979884 | 1.075422233 | 0.815889499 | 1.417511785 |  |  |  |  |  |  |  |
| Weighted mode | 9 | 0.613856786 | 1.07317355 | 0.824433906 | 1.396960337 |  |  |  |  |  |  |  |
| Unstable angina pectoris | Getting up in morning | MR Egger | 9 | 0.021965269 | 0.505301099 | 0.320162239 | 0.797499422 | 4.600148348 | 0.708626579 |  |  | 0.088679428 | 0.028507319 | 0.151333333 |
| Weighted median | 9 | 0.328252481 | 0.918005412 | 0.773314818 | 1.089768251 |  |  |  |  |  |  |  |
| Inverse variance weighted | 9 | 0.394680001 | 0.935540774 | 0.802468072 | 1.090680826 | 12.16220078 | 0.144112288 |  |  |  |  |  |
| Simple mode | 9 | 0.537473188 | 0.906742369 | 0.673174215 | 1.221350587 |  |  |  |  |  |  |  |
| Weighted mode | 9 | 0.501842422 | 0.904053326 | 0.682505884 | 1.197517024 |  |  |  |  |  |  |  |
| Unstable angina pectoris | Morning/evening person (chronotype) | MR Egger | 9 | 0.326694437 | 1.435605703 | 0.733073785 | 2.811400133 | 8.67344343 | 0.276959309 |  |  | -0.029920242 | 0.549306542 | 0.336666667 |
| Weighted median | 9 | 0.259063147 | 1.13290914 | 0.912172702 | 1.407061533 |  |  |  |  |  |  |  |
| Inverse variance weighted | 9 | 0.088820517 | 1.166724539 | 0.976860992 | 1.393490129 | 9.163693457 | 0.328675835 |  |  |  |  |  |
| Simple mode | 9 | 0.560583737 | 1.108438704 | 0.795012228 | 1.54543077 |  |  |  |  |  |  |  |
| Weighted mode | 9 | 0.443021782 | 1.13203687 | 0.837604373 | 1.529967508 |  |  |  |  |  |  |  |
| Unstable angina pectoris | Nap during day | MR Egger | 9 | 0.989187878 | 1.003378479 | 0.626638085 | 1.606618552 | 12.74254308 | 0.078635336 |  |  | -0.011929189 | 0.730499287 | 0.142666667 |
| Weighted median | 9 | 0.439185225 | 0.946448708 | 0.823254422 | 1.088078162 |  |  |  |  |  |  |  |
| Inverse variance weighted | 9 | 0.19827383 | 0.923590761 | 0.818251192 | 1.042491478 | 12.97656963 | 0.112658323 |  |  |  |  |  |
| Simple mode | 9 | 0.892878677 | 0.984270756 | 0.787102931 | 1.230828756 |  |  |  |  |  |  |  |
| Weighted mode | 9 | 0.797867995 | 0.971974272 | 0.787541017 | 1.199599721 |  |  |  |  |  |  |  |
| Unstable angina pectoris | Sleeplessness / insomnia | MR Egger | 5 | 0.271938631 | 1.578815275 | 0.810601554 | 3.075071419 | 5.967931361 | 0.113180901 | 1.010695162 | 0.873538237 | -0.0680999 | 0.270318712 | 0.079333333 |
| Weighted median | 5 | 0.790300031 | 1.02570837 | 0.85068944 | 1.236735301 |  |  |  |  |  |  |  |
| Inverse variance weighted | 5 | 0.873538237 | 1.016951619 | 0.826804863 | 1.250827905 | 9.584410995 | 0.048041389 |  |  |  |  |  |
| Simple mode | 5 | 0.870321613 | 1.021363845 | 0.8049412 | 1.295975536 |  |  |  |  |  |  |  |
| Weighted mode | 5 | 0.878115449 | 1.01945006 | 0.809142481 | 1.284419556 |  |  |  |  |  |  |  |
| Unstable angina pectoris | Snoring | MR Egger | 9 | 0.573791716 | 0.666242475 | 0.172839483 | 2.568157625 | 3.650360461 | 0.819052392 |  |  | 0.118485111 | 0.253889123 | 0.747666667 |
| Weighted median | 9 | 0.13403097 | 1.456673576 | 0.890581 | 2.382599571 |  |  |  |  |  |  |  |
| Inverse variance weighted | 9 | 0.025905162 | 1.517855776 | 1.051412844 | 2.19122885 | 5.195381815 | 0.736503949 |  |  |  |  |  |
| Simple mode | 9 | 0.393139567 | 1.431447326 | 0.656872337 | 3.119390685 |  |  |  |  |  |  |  |
| Weighted mode | 9 | 0.334291706 | 1.446154814 | 0.715431603 | 2.923219689 |  |  |  |  |  |  |  |
| Unstable angina pectoris | Daytime dozing / sleeping (narcolepsy) | MR Egger | 9 | 0.935368032 | 1.014752413 | 0.721191315 | 1.427807624 | 7.847873217 | 0.346199373 |  |  | -0.017383248 | 0.494439178 | 0.425 |
| Weighted median | 9 | 0.414392361 | 0.94874571 | 0.836136676 | 1.076520679 |  |  |  |  |  |  |  |
| Inverse variance weighted | 9 | 0.020841647 | 0.899251585 | 0.821796633 | 0.984006724 | 8.430231992 | 0.392610464 |  |  |  |  |  |
| Simple mode | 9 | 0.617702893 | 0.946768802 | 0.770117049 | 1.163941462 |  |  |  |  |  |  |  |
| Weighted mode | 9 | 0.574661915 | 0.943391985 | 0.776072924 | 1.146784549 |  |  |  |  |  |  |  |
